# Supplementary material for: CRISPR/Cas-mediated non-viral genome specific targeted CAR T cells achieve high safety and efficacy in relapsed/refractory B-cell non-Hodgkin lymphoma
Source: Research Square preprint supplement (doi:10.21203/rs.3.rs-373651/v1), 2021-04-03
Supplement: Supplementary file 2 [file 3acc8911372d5b8fdb398ec1.xlsx]

## Sheet: sheet1
Table S8: Differentially expressed genes in CD8+/CAR+ T cells between the infusion products (IP) and day 28/29 samples after infusion
*Calculated by two-sided Wilcoxon rank sum test in Seurat R package
**P-value corrected using Bonferroni method in Seurat R package
Gene	p_val*	avg_logFC	pct.1 (IP)	pct.2 (D28/D29)	p_val_adj**	up_down
GZMH	1.87272e-117	-2.33781	0.078	0.885	3.57258e-113	downregulated
GNLY	1.28316e-112	-3.36559	0.109	0.903	2.44789e-108	downregulated
RPS27	3.89276e-104	-1.35474	1	1	7.42623e-100	downregulated
CST7	3.66098e-102	-1.93928	0.725	0.996	6.98405e-98	downregulated
ENO1	1.11159e-98	1.79239	1	0.806	2.12059e-94	upregulated
RPS29	1.36284e-98	-1.11258	1	1	2.5999e-94	downregulated
GAPDH	6.45742e-98	1.66235	1	0.969	1.23188e-93	upregulated
CCL4	7.16412e-96	-1.23174	0.092	0.828	1.3667e-91	downregulated
NKG7	1.405e-91	-1.63367	0.996	1	2.68031e-87	downregulated
RPL39	1.44633e-91	-0.823125	0.998	1	2.75917e-87	downregulated
CISH	2.80717e-91	1.2814	0.948	0.053	5.35523e-87	upregulated
CCL5	6.46683e-90	-1.70235	0.896	0.996	1.23368e-85	downregulated
VIM	3.41969e-89	1.32453	1	0.93	6.52373e-85	upregulated
TXNIP	2.94838e-87	-1.56113	0.889	0.996	5.62462e-83	downregulated
B2M	3.37056e-87	-0.677274	1	1	6.43002e-83	downregulated
PLEK	1.42857e-86	-1.43736	0.081	0.74	2.72529e-82	downregulated
RPS15A	1.72139e-86	-0.731012	1	1	3.28391e-82	downregulated
SOCS1	9.50534e-84	1.20742	0.904	0.04	1.81333e-79	upregulated
TPI1	1.8063e-83	1.73253	0.991	0.643	3.44588e-79	upregulated
PGK1	5.13063e-82	1.56072	0.993	0.59	9.7877e-78	upregulated
HLA-C	6.73675e-82	-0.866097	1	1	1.28517e-77	downregulated
RPL37	8.73937e-82	-0.698546	1	1	1.66721e-77	downregulated
CCND2	1.48273e-81	1.36611	0.969	0.264	2.8286e-77	upregulated
ACTG1	4.85323e-81	1.06092	1	0.969	9.2585e-77	upregulated
RPL41	5.44812e-80	-0.63128	1	1	1.03934e-75	downregulated
LTB	1.62287e-78	2.0036	0.996	0.709	3.09595e-74	upregulated
LDHA	3.11505e-78	1.60801	0.98	0.621	5.94258e-74	upregulated
RPL37A	4.22183e-78	-0.706037	1	1	8.05399e-74	downregulated
LRRN3	1.43013e-77	1.14517	0.819	0	2.72826e-73	upregulated
ANP32B	7.80672e-77	1.11667	0.985	0.595	1.48929e-72	upregulated
RPL38	1.49915e-76	-0.697328	0.996	1	2.85992e-72	downregulated
PKM	1.79033e-76	1.5214	0.97	0.405	3.41541e-72	upregulated
RPL34	2.72775e-76	-0.776763	1	1	5.20373e-72	downregulated
RARRES3	3.39543e-76	-1.32898	0.806	0.952	6.47745e-72	downregulated
FCGR3A	3.18404e-75	-1.45791	0.011	0.559	6.0742e-71	downregulated
ACTB	4.25828e-75	0.909785	1	1	8.12353e-71	upregulated
RFLNB	1.54537e-74	1.04601	0.954	0.185	2.9481e-70	upregulated
CX3CR1	3.43959e-74	-1.2503	0.013	0.555	6.5617e-70	downregulated
COTL1	9.22227e-74	1.14323	0.993	0.568	1.75933e-69	upregulated
LITAF	1.86231e-73	-1.1525	0.752	0.952	3.55272e-69	downregulated
RPL30	6.36395e-73	-0.587154	1	1	1.21405e-68	downregulated
PYHIN1	8.89807e-73	-1.08526	0.104	0.692	1.69748e-68	downregulated
TPM4	2.12785e-72	1.17397	0.946	0.247	4.05929e-68	upregulated
RPL26	2.90206e-72	-0.583366	1	1	5.53625e-68	downregulated
ALOX5AP	7.44942e-70	1.09329	0.885	0.093	1.42113e-65	upregulated
SATB1	1.6007e-69	1.1237	0.915	0.145	3.05366e-65	upregulated
MAL	2.97471e-69	1.30941	0.891	0.128	5.67485e-65	upregulated
TYMS	4.21007e-69	1.592	0.797	0.026	8.03156e-65	upregulated
STMN1	5.6383e-69	1.61967	0.861	0.11	1.07562e-64	upregulated
MALAT1	9.43453e-69	-1.4697	0.998	1	1.79983e-64	downregulated
FTL	9.04375e-68	0.88231	1	1	1.72528e-63	upregulated
SLC25A5	1.6441e-66	0.991517	0.983	0.634	3.13645e-62	upregulated
TXN	2.10634e-66	1.01411	0.993	0.74	4.01827e-62	upregulated
PCNA	5.33214e-66	1.3108	0.884	0.159	1.01721e-61	upregulated
PCLAF	7.45486e-66	1.42131	0.791	0.035	1.42216e-61	upregulated
RPS28	1.39308e-65	-0.596653	1	1	2.65758e-61	downregulated
RPS21	2.70344e-65	-0.665695	1	1	5.15734e-61	downregulated
DPP4	5.30943e-65	0.841771	0.882	0.101	1.01288e-60	upregulated
HDGFL3	1.29128e-64	0.778641	0.8	0.04	2.46337e-60	upregulated
PIM1	4.54001e-63	0.944696	0.961	0.269	8.66097e-59	upregulated
CHCHD2	5.8613e-63	0.691241	0.996	0.969	1.11816e-58	upregulated
ALDOA	1.30806e-62	1.00164	0.996	0.863	2.49539e-58	upregulated
TUBB	1.68438e-62	1.70142	0.946	0.379	3.21328e-58	upregulated
RAN	9.58693e-62	0.980965	0.978	0.762	1.8289e-57	upregulated
DDIT4	9.34823e-61	1.04091	0.797	0.075	1.78336e-56	upregulated
H2AFZ	2.91123e-60	1.38153	0.985	0.643	5.55376e-56	upregulated
ITGB1	4.50039e-60	-1.51186	0.357	0.789	8.58539e-56	downregulated
RPS25	7.71949e-60	-0.526449	1	1	1.47265e-55	downregulated
PPIA	1.49609e-59	0.661117	1	0.978	2.85409e-55	upregulated
CAPG	1.24513e-58	0.965512	0.835	0.119	2.37533e-54	upregulated
GZMK	1.64485e-58	-2.10456	0.27	0.762	3.13788e-54	downregulated
FURIN	1.79853e-58	0.721743	0.797	0.07	3.43106e-54	upregulated
MKI67	9.46659e-58	1.48685	0.725	0.04	1.80594e-53	upregulated
HMGB1	2.73756e-57	0.835503	1	0.969	5.22244e-53	upregulated
LST1	2.84112e-57	0.887165	0.85	0.132	5.42e-53	upregulated
HCST	3.02394e-57	-0.866097	0.983	0.987	5.76877e-53	downregulated
RPL35A	1.09514e-56	-0.520329	1	1	2.08919e-52	downregulated
OSM	3.6324e-56	1.14339	0.677	0.009	6.92953e-52	upregulated
RPLP0	4.17894e-56	0.666857	1	0.969	7.97217e-52	upregulated
PGAM1	6.88692e-56	1.00736	0.97	0.537	1.31382e-51	upregulated
RPS10	9.33422e-56	-0.510519	1	1	1.78069e-51	downregulated
TUBA1B	2.52657e-55	1.78067	0.95	0.599	4.81995e-51	upregulated
ARPC5	4.47899e-55	0.686915	0.996	0.714	8.54458e-51	upregulated
DDX5	8.56207e-55	-0.752356	0.963	0.987	1.63339e-50	downregulated
LDHB	1.14888e-54	0.667281	0.996	0.837	2.19173e-50	upregulated
ATP5E	1.27618e-54	-0.571812	1	1	2.43457e-50	downregulated
RPL36	1.58429e-53	-0.542602	1	1	3.02234e-49	downregulated
TALDO1	4.6815e-53	0.748727	0.963	0.52	8.9309e-49	upregulated
LAIR2	7.51987e-53	-1.12706	0.004	0.396	1.43456e-48	downregulated
KLRC1	7.82213e-53	-1.21949	0.031	0.463	1.49223e-48	downregulated
NDUFV2	1.2943e-52	0.748552	0.982	0.533	2.46914e-48	upregulated
PPP2R5C	1.78749e-52	-0.965961	0.856	0.903	3.40999e-48	downregulated
IL32	1.88491e-52	0.630572	1	0.996	3.59585e-48	upregulated
GZMM	6.87271e-52	-0.958968	0.799	0.921	1.31111e-47	downregulated
KLRD1	7.7628e-52	-1.34119	0.061	0.515	1.48091e-47	downregulated
DDX39A	8.2824e-52	0.830464	0.839	0.176	1.58003e-47	upregulated
RPS24	1.0475e-51	-0.419122	1	1	1.99832e-47	downregulated
PA2G4	1.42754e-51	0.785037	0.967	0.595	2.72332e-47	upregulated
CARHSP1	1.5009e-51	0.819345	0.943	0.317	2.86326e-47	upregulated
PRDX2	2.68819e-51	0.763373	0.974	0.577	5.12826e-47	upregulated
ATP5G3	2.83544e-51	0.660088	0.994	0.815	5.40916e-47	upregulated
TUBA1C	3.78933e-51	1.02271	0.782	0.123	7.22891e-47	upregulated
NCF4	7.46244e-51	0.655938	0.787	0.097	1.42361e-46	upregulated
DARS	1.38779e-50	0.689733	0.885	0.194	2.64749e-46	upregulated
HLA-E	1.69394e-50	-0.701741	0.993	0.996	3.23153e-46	downregulated
GMNN	3.09947e-50	0.647211	0.713	0.062	5.91286e-46	upregulated
BCL2	3.87307e-50	0.614287	0.75	0.075	7.38866e-46	upregulated
KLRG1	5.74783e-50	-1.13951	0.118	0.573	1.09651e-45	downregulated
MAD2L1	7.45428e-50	0.797146	0.736	0.093	1.42205e-45	upregulated
UBE2T	9.11649e-50	0.812496	0.699	0.057	1.73915e-45	upregulated
COMMD6	1.57138e-49	-0.703577	0.961	0.947	2.99772e-45	downregulated
RAB11FIP1	1.75734e-49	0.698397	0.813	0.141	3.35248e-45	upregulated
RPL21	4.43123e-49	-0.43023	1	1	8.45345e-45	downregulated
ITM2C	3.08027e-48	0.69815	0.623	0.013	5.87623e-44	upregulated
ZWINT	3.21682e-48	0.720834	0.638	0.026	6.13672e-44	upregulated
DUSP2	3.34298e-48	-1.34322	0.183	0.626	6.3774e-44	downregulated
GPI	3.67921e-48	0.973951	0.852	0.229	7.01883e-44	upregulated
TKT	5.70958e-48	0.722256	0.952	0.33	1.08922e-43	upregulated
H2AFY	7.09266e-48	0.747364	0.933	0.357	1.35307e-43	upregulated
HMGA1	1.05087e-47	0.83134	0.867	0.238	2.00475e-43	upregulated
SRSF5	1.23139e-47	-0.729402	0.952	0.943	2.34913e-43	downregulated
DUSP6	1.42373e-47	0.667565	0.641	0.026	2.71604e-43	upregulated
UBE2S	1.77494e-47	1.21187	0.832	0.247	3.38606e-43	upregulated
TIGIT	1.88449e-47	-0.894426	0.076	0.511	3.59504e-43	downregulated
SOS1	2.58934e-47	0.680685	0.776	0.119	4.93969e-43	upregulated
TRABD2A	3.45216e-47	0.488696	0.59	0	6.58568e-43	upregulated
CLTA	3.72341e-47	0.671357	0.974	0.485	7.10316e-43	upregulated
TOP2A	4.75943e-47	1.45366	0.638	0.04	9.07957e-43	upregulated
IL2RA	5.58212e-47	0.801139	0.588	0	1.0649e-42	upregulated
CENPF	5.98669e-47	1.19506	0.619	0.026	1.14208e-42	upregulated
HSP90AA1	9.13496e-47	0.861471	0.998	0.912	1.74268e-42	upregulated
NUDT1	1.49348e-46	0.795786	0.885	0.286	2.84912e-42	upregulated
MYL6B	1.94298e-46	0.506494	0.754	0.097	3.70662e-42	upregulated
ZEB2	2.96982e-46	-0.967243	0.068	0.485	5.66552e-42	downregulated
HMGB3	3.14431e-46	0.590871	0.606	0.013	5.9984e-42	upregulated
RNF157	3.29226e-46	0.559013	0.75	0.093	6.28065e-42	upregulated
NCR3	5.24159e-46	0.758124	0.823	0.181	9.99938e-42	upregulated
CD81	9.97191e-46	-0.763893	0.917	0.938	1.90234e-41	downregulated
SLC25A3	1.03684e-45	0.650027	0.974	0.705	1.97798e-41	upregulated
ASF1B	1.08229e-45	0.626617	0.604	0.018	2.06469e-41	upregulated
HSPD1	1.11898e-45	1.00813	0.867	0.286	2.13467e-41	upregulated
LSM4	1.19502e-45	0.763122	0.904	0.374	2.27974e-41	upregulated
NUCKS1	1.21434e-45	0.760189	0.965	0.639	2.31659e-41	upregulated
RRM2	1.46202e-45	1.05957	0.617	0.026	2.78909e-41	upregulated
MCM7	1.61766e-45	0.783514	0.71	0.093	3.08601e-41	upregulated
ATP5B	1.97891e-45	0.65974	0.983	0.59	3.77516e-41	upregulated
NAP1L1	2.31608e-45	0.698578	0.98	0.678	4.41839e-41	upregulated
HTATSF1	2.50354e-45	0.706838	0.837	0.176	4.77601e-41	upregulated
RPL6	2.64117e-45	-0.462703	1	1	5.03857e-41	downregulated
BIRC5	3.23801e-45	0.919046	0.599	0.022	6.17716e-41	upregulated
NASP	4.63307e-45	0.839488	0.904	0.366	8.83851e-41	upregulated
TK1	5.38652e-45	0.841024	0.625	0.04	1.02759e-40	upregulated
CKS1B	7.52027e-45	0.918228	0.712	0.11	1.43464e-40	upregulated
ASCL2	8.48578e-45	-0.780765	0.007	0.352	1.61883e-40	downregulated
PAICS	8.98991e-45	0.678623	0.652	0.053	1.71501e-40	upregulated
CENPW	1.01476e-44	0.665799	0.641	0.04	1.93586e-40	upregulated
CD247	1.03817e-44	-0.680562	0.983	0.987	1.98052e-40	downregulated
HMGB2	1.13271e-44	1.32048	0.926	0.599	2.16088e-40	upregulated
EBP	1.73182e-44	0.771096	0.906	0.37	3.3038e-40	upregulated
HNRNPAB	1.74403e-44	0.840772	0.871	0.295	3.32709e-40	upregulated
CLSPN	2.20674e-44	0.664249	0.627	0.035	4.2098e-40	upregulated
H2AFX	3.17107e-44	0.996583	0.695	0.11	6.04945e-40	upregulated
PTTG1	3.18686e-44	0.977215	0.728	0.128	6.07958e-40	upregulated
SMC2	3.56716e-44	0.760089	0.763	0.163	6.80506e-40	upregulated
BHLHE40	4.18019e-44	0.685671	0.889	0.238	7.97455e-40	upregulated
HMGN2	4.26013e-44	0.905837	0.969	0.709	8.12706e-40	upregulated
FEN1	4.97607e-44	0.717164	0.654	0.062	9.49285e-40	upregulated
SNRPD1	6.45026e-44	0.72426	0.948	0.458	1.23052e-39	upregulated
CD55	8.10052e-44	0.640964	0.889	0.225	1.54534e-39	upregulated
PTPRC	1.08431e-43	-0.636083	0.991	0.996	2.06854e-39	downregulated
EIF5A	1.21982e-43	0.718355	0.976	0.639	2.32705e-39	upregulated
TMEM123	2.00472e-43	0.630097	0.943	0.3	3.8244e-39	upregulated
TPX2	2.01967e-43	0.874209	0.608	0.04	3.85292e-39	upregulated
FGFBP2	2.34992e-43	-1.50089	0.216	0.643	4.48294e-39	downregulated
TMEM14C	3.70307e-43	0.533935	0.797	0.137	7.06436e-39	upregulated
SLC16A3	5.40759e-43	0.704941	0.734	0.123	1.03161e-38	upregulated
MRPL37	6.88529e-43	0.518938	0.765	0.123	1.31351e-38	upregulated
SNX10	9.0087e-43	0.504956	0.702	0.079	1.71859e-38	upregulated
MRPL17	1.0466e-42	0.553801	0.806	0.15	1.9966e-38	upregulated
CDT1	1.06257e-42	0.542135	0.612	0.035	2.02707e-38	upregulated
LGALS1	1.2796e-42	0.966895	0.989	0.837	2.44109e-38	upregulated
MCM4	1.45856e-42	0.587873	0.606	0.035	2.7825e-38	upregulated
CDK2AP1	2.45726e-42	0.451575	0.665	0.062	4.68772e-38	upregulated
CENPM	2.51893e-42	0.657744	0.686	0.084	4.80537e-38	upregulated
NUSAP1	2.79471e-42	0.992161	0.656	0.084	5.33146e-38	upregulated
FRMD4B	3.52156e-42	0.502963	0.614	0.035	6.71808e-38	upregulated
PRDX1	4.51324e-42	0.793028	0.945	0.564	8.60991e-38	upregulated
CD2	4.67131e-42	-0.798044	0.957	0.96	8.91146e-38	downregulated
CDKN3	4.86479e-42	0.793131	0.595	0.035	9.28055e-38	upregulated
ERO1A	5.21528e-42	0.550119	0.826	0.163	9.94919e-38	upregulated
RRM1	6.3909e-42	0.619025	0.739	0.123	1.21919e-37	upregulated
HINT1	7.07143e-42	0.44692	0.998	0.938	1.34902e-37	upregulated
C19orf48	7.46476e-42	0.550079	0.634	0.053	1.42405e-37	upregulated
TMSB10	9.22014e-42	0.396134	1	1	1.75893e-37	upregulated
GNA15	1.09767e-41	0.463666	0.549	0.004	2.09403e-37	upregulated
RBM17	1.17509e-41	0.636709	0.869	0.229	2.24172e-37	upregulated
RRAS2	1.80384e-41	0.526466	0.762	0.132	3.44119e-37	upregulated
CACYBP	1.81898e-41	0.636392	0.906	0.339	3.47007e-37	upregulated
LMNB1	1.9642e-41	0.617822	0.697	0.097	3.7471e-37	upregulated
IFI27L1	2.6728e-41	0.416959	0.617	0.04	5.0989e-37	upregulated
GLO1	2.82402e-41	0.597603	0.839	0.207	5.38737e-37	upregulated
NFKB1	2.83926e-41	0.485141	0.769	0.119	5.41646e-37	upregulated
DHFR	2.9118e-41	0.644882	0.695	0.097	5.55484e-37	upregulated
COX8A	3.63962e-41	0.554931	0.994	0.841	6.9433e-37	upregulated
HLA-A	4.58484e-41	-0.433506	1	1	8.74651e-37	downregulated
CALM3	5.81474e-41	0.645037	0.972	0.617	1.10928e-36	upregulated
CORO1A	9.46366e-41	0.499139	0.998	0.96	1.80538e-36	upregulated
CHEK1	1.62815e-40	0.505933	0.625	0.053	3.10602e-36	upregulated
NUF2	2.21944e-40	0.673979	0.534	0.004	4.23402e-36	upregulated
ETFB	2.35203e-40	0.649606	0.959	0.432	4.48696e-36	upregulated
PPP1R14B	3.03253e-40	0.729684	0.823	0.238	5.78516e-36	upregulated
TNFSF10	3.60823e-40	0.969463	0.9	0.326	6.88342e-36	upregulated
TXNDC17	4.55557e-40	0.620517	0.917	0.348	8.69067e-36	upregulated
GCHFR	6.49637e-40	0.586856	0.765	0.15	1.23931e-35	upregulated
ALYREF	6.60101e-40	0.655655	0.824	0.211	1.25927e-35	upregulated
CKS2	6.66705e-40	0.825653	0.71	0.132	1.27187e-35	upregulated
PPIF	6.7047e-40	0.508689	0.643	0.066	1.27906e-35	upregulated
CCNB2	9.91545e-40	0.724575	0.545	0.018	1.89157e-35	upregulated
RPS27A	1.01048e-39	-0.369817	1	1	1.9277e-35	downregulated
UBALD2	1.03528e-39	0.75434	0.982	0.52	1.97501e-35	upregulated
DUT	1.15184e-39	1.05896	0.895	0.463	2.19737e-35	upregulated
CBX5	1.46296e-39	0.586153	0.787	0.172	2.79089e-35	upregulated
ADAM19	1.47585e-39	0.461632	0.713	0.101	2.81548e-35	upregulated
RPL32	1.82299e-39	-0.371757	1	1	3.47771e-35	downregulated
PTMA	2.40114e-39	0.528634	1	1	4.58065e-35	upregulated
MMP25	3.07191e-39	0.452693	0.516	0	5.86028e-35	upregulated
TEX30	4.34826e-39	0.459681	0.699	0.097	8.29517e-35	upregulated
RPL36A	4.38401e-39	-0.67262	0.961	0.952	8.36338e-35	downregulated
CLDND1	4.63257e-39	0.617372	0.863	0.256	8.83756e-35	upregulated
SGO1	5.67391e-39	0.479756	0.547	0.018	1.08241e-34	upregulated
CBX3	5.88496e-39	0.603382	0.97	0.551	1.12267e-34	upregulated
NME1	6.44311e-39	0.720196	0.839	0.278	1.22915e-34	upregulated
RPS6KA5	8.75561e-39	0.54993	0.678	0.097	1.67031e-34	upregulated
GLUL	8.96374e-39	0.540594	0.656	0.084	1.71001e-34	upregulated
H2AFJ	1.05922e-38	0.565457	0.826	0.203	2.02067e-34	upregulated
MFHAS1	1.12367e-38	0.410534	0.628	0.057	2.14363e-34	upregulated
CDK1	1.48654e-38	0.873411	0.545	0.026	2.83588e-34	upregulated
SNRPG	1.7261e-38	0.570072	0.97	0.683	3.29287e-34	upregulated
RFC2	2.65486e-38	0.444221	0.63	0.066	5.06467e-34	upregulated
MZT2B	3.031e-38	0.52747	0.994	0.815	5.78224e-34	upregulated
CCT8	5.48141e-38	0.592211	0.957	0.485	1.04569e-33	upregulated
PTDSS1	6.78817e-38	0.406478	0.654	0.075	1.29498e-33	upregulated
IMPDH2	6.84451e-38	0.546002	0.723	0.132	1.30573e-33	upregulated
UBE2C	1.23251e-37	1.20522	0.529	0.018	2.35127e-33	upregulated
RANBP1	1.4825e-37	0.763963	0.915	0.485	2.82816e-33	upregulated
TUBA4A	1.48254e-37	0.802894	0.943	0.507	2.82824e-33	upregulated
CFL1	1.73024e-37	0.406356	1	1	3.30078e-33	upregulated
H2AFV	1.83343e-37	0.684242	0.963	0.577	3.49764e-33	upregulated
HMMR	2.15879e-37	0.754247	0.523	0.018	4.11832e-33	upregulated
ZFP36L2	2.28448e-37	-0.892556	0.824	0.881	4.3581e-33	downregulated
FGR	2.50049e-37	-0.542003	0.006	0.295	4.77018e-33	downregulated
BATF3	2.73112e-37	0.658889	0.51	0.009	5.21016e-33	upregulated
LEF1	3.6888e-37	0.493634	0.627	0.07	7.03713e-33	upregulated
YWHAE	4.20501e-37	0.599569	0.915	0.339	8.02191e-33	upregulated
C12orf57	5.44707e-37	-0.891067	0.787	0.841	1.03914e-32	downregulated
BTG1	5.92342e-37	-0.669409	0.969	0.987	1.13001e-32	downregulated
HNRNPD	5.95829e-37	0.583938	0.985	0.604	1.13666e-32	upregulated
RPL17	1.04093e-36	-0.72938	0.908	0.872	1.98578e-32	downregulated
LSM5	1.06554e-36	0.634519	0.889	0.361	2.03273e-32	upregulated
LRR1	1.0861e-36	0.448398	0.586	0.048	2.07195e-32	upregulated
GINS2	1.13269e-36	0.611885	0.536	0.026	2.16084e-32	upregulated
VDAC1	1.15184e-36	0.651485	0.93	0.396	2.19736e-32	upregulated
MYBL2	1.32388e-36	0.505267	0.516	0.018	2.52557e-32	upregulated
TIMP1	1.38644e-36	0.671974	0.725	0.154	2.6449e-32	upregulated
SGO2	1.60149e-36	0.565101	0.556	0.04	3.05516e-32	upregulated
ASPM	1.89583e-36	0.96662	0.529	0.026	3.61668e-32	upregulated
P4HB	2.04122e-36	0.583977	0.943	0.493	3.89404e-32	upregulated
SNRNP25	2.12406e-36	0.486848	0.721	0.132	4.05207e-32	upregulated
DDB2	2.25289e-36	0.47373	0.693	0.119	4.29784e-32	upregulated
TSC22D3	2.26459e-36	-0.96404	0.49	0.753	4.32016e-32	downregulated
ATP5F1	2.32927e-36	0.562368	0.965	0.493	4.44355e-32	upregulated
CCNA2	2.64039e-36	0.663725	0.525	0.026	5.03708e-32	upregulated
AK4	2.80477e-36	0.60624	0.486	0	5.35065e-32	upregulated
CDK6	3.1246e-36	0.561932	0.843	0.238	5.9608e-32	upregulated
PRDX3	3.59172e-36	0.584837	0.834	0.242	6.85192e-32	upregulated
MZB1	3.98058e-36	0.475038	0.53	0.022	7.59375e-32	upregulated
ACAT2	4.01498e-36	0.53981	0.704	0.137	7.65937e-32	upregulated
CENPH	4.78817e-36	0.469149	0.59	0.062	9.1344e-32	upregulated
RPA3	5.42942e-36	0.618771	0.871	0.313	1.03577e-31	upregulated
GGCT	5.55546e-36	0.471635	0.738	0.15	1.05981e-31	upregulated
PSMB2	5.59608e-36	0.583084	0.95	0.515	1.06756e-31	upregulated
HSPA8	6.51537e-36	0.601344	0.998	0.903	1.24294e-31	upregulated
YBX1	8.22953e-36	0.566268	0.989	0.881	1.56995e-31	upregulated
AURKB	8.26735e-36	0.645135	0.512	0.018	1.57716e-31	upregulated
GTSE1	1.30015e-35	0.690979	0.499	0.013	2.4803e-31	upregulated
AIF1	1.58707e-35	0.559538	0.85	0.251	3.02766e-31	upregulated
ANP32E	1.75418e-35	0.734371	0.9	0.423	3.34645e-31	upregulated
TUBG1	1.99469e-35	0.351324	0.514	0.018	3.80527e-31	upregulated
HLA-F	2.20712e-35	-0.67824	0.921	0.899	4.21053e-31	downregulated
PSMC2	2.56148e-35	0.44406	0.767	0.163	4.88653e-31	upregulated
MRPL12	2.57032e-35	0.554598	0.741	0.154	4.9034e-31	upregulated
LSM2	2.8371e-35	0.570899	0.921	0.388	5.41234e-31	upregulated
UQCRH	4.26607e-35	0.486246	0.991	0.828	8.13838e-31	upregulated
SNRPB	5.81686e-35	0.568784	0.982	0.709	1.10968e-30	upregulated
RCAN3	6.85535e-35	0.393159	0.669	0.101	1.3078e-30	upregulated
IKBIP	8.69536e-35	0.391716	0.684	0.115	1.65881e-30	upregulated
PLAC8	1.07118e-34	0.728391	0.634	0.11	2.04348e-30	upregulated
STX3	1.08048e-34	0.424149	0.518	0.022	2.06123e-30	upregulated
MZT2A	1.53939e-34	0.521714	0.989	0.63	2.9367e-30	upregulated
NABP2	1.69734e-34	0.364488	0.656	0.097	3.23801e-30	upregulated
PHF19	1.84435e-34	0.550208	0.776	0.194	3.51846e-30	upregulated
RRP7A	2.27348e-34	0.498406	0.713	0.141	4.33712e-30	upregulated
RPL23A	2.62057e-34	-0.316366	1	1	4.99926e-30	downregulated
FLT3LG	2.81435e-34	0.48017	0.754	0.167	5.36893e-30	upregulated
S100A9	2.85266e-34	-0.483297	0	0.256	5.44201e-30	downregulated
CDCA5	3.00503e-34	0.421396	0.482	0.013	5.7327e-30	upregulated
MZT1	3.48771e-34	0.514713	0.684	0.123	6.6535e-30	upregulated
CCDC34	3.74526e-34	0.391897	0.538	0.035	7.14483e-30	upregulated
ADGRG1	3.95643e-34	-0.663937	0.024	0.322	7.54769e-30	downregulated
CCNB1	3.99915e-34	0.904834	0.505	0.026	7.62918e-30	upregulated
MRPS15	5.23585e-34	0.515248	0.922	0.335	9.98843e-30	upregulated
MTCH2	5.29255e-34	0.457362	0.771	0.176	1.00966e-29	upregulated
MRPL13	5.66653e-34	0.470909	0.845	0.229	1.081e-29	upregulated
GSTP1	5.92505e-34	0.661442	0.959	0.696	1.13032e-29	upregulated
SAE1	6.07564e-34	0.403906	0.656	0.101	1.15905e-29	upregulated
SUSD3	6.83686e-34	0.387152	0.586	0.062	1.30427e-29	upregulated
BCL2L12	6.94364e-34	0.400146	0.634	0.088	1.32464e-29	upregulated
HNRNPF	1.03384e-33	0.517958	0.98	0.736	1.97226e-29	upregulated
IFITM3	1.07637e-33	0.570206	0.625	0.097	2.05339e-29	upregulated
MAPKAPK3	1.13116e-33	0.422443	0.76	0.163	2.15792e-29	upregulated
EIF4A3	1.1751e-33	0.553552	0.747	0.185	2.24175e-29	upregulated
ACTN1	1.25597e-33	0.421005	0.475	0.009	2.39601e-29	upregulated
CDC20	1.25817e-33	0.721758	0.488	0.018	2.40021e-29	upregulated
PSMD14	1.48924e-33	0.494509	0.799	0.203	2.84102e-29	upregulated
CENPU	1.54946e-33	0.333136	0.514	0.026	2.95591e-29	upregulated
CDCA7	1.66883e-33	0.442119	0.564	0.053	3.18363e-29	upregulated
MCM2	1.80527e-33	0.417871	0.495	0.022	3.44392e-29	upregulated
NCAPH	1.80826e-33	0.418844	0.508	0.026	3.44962e-29	upregulated
CD27	1.83736e-33	-0.799211	0.83	0.85	3.50513e-29	downregulated
SELENOH	1.88497e-33	0.558515	0.974	0.524	3.59595e-29	upregulated
CDK4	1.9559e-33	0.468731	0.689	0.132	3.73126e-29	upregulated
COX5A	1.97359e-33	0.494419	0.982	0.7	3.76502e-29	upregulated
PRF1	2.66845e-33	-0.866977	0.861	0.885	5.0906e-29	downregulated
SLC39A8	2.89465e-33	0.300376	0.534	0.035	5.52211e-29	upregulated
HSPH1	3.02855e-33	0.499425	0.706	0.145	5.77757e-29	upregulated
CISD2	3.04431e-33	0.423375	0.769	0.176	5.80762e-29	upregulated
KIF11	3.21815e-33	0.490795	0.523	0.035	6.13927e-29	upregulated
MCM6	3.30991e-33	0.484615	0.591	0.07	6.31432e-29	upregulated
NANS	4.00775e-33	0.373179	0.647	0.097	7.64558e-29	upregulated
NPC2	4.22685e-33	0.409099	0.656	0.106	8.06357e-29	upregulated
PRC1	4.30245e-33	0.520707	0.553	0.062	8.20779e-29	upregulated
TFDP1	4.46514e-33	0.435601	0.715	0.141	8.51814e-29	upregulated
SSRP1	4.59543e-33	0.484667	0.791	0.203	8.76669e-29	upregulated
BAX	5.0922e-33	0.670838	0.976	0.643	9.7144e-29	upregulated
CCT2	5.45198e-33	0.571335	0.871	0.313	1.04008e-28	upregulated
SHCBP1	5.64496e-33	0.379048	0.488	0.018	1.07689e-28	upregulated
TMEM70	5.73036e-33	0.341414	0.641	0.101	1.09318e-28	upregulated
CD38	6.77768e-33	0.419	0.658	0.115	1.29298e-28	upregulated
CEP55	6.7875e-33	0.452709	0.523	0.04	1.29485e-28	upregulated
SHMT2	8.43744e-33	0.43204	0.715	0.15	1.60961e-28	upregulated
FAU	9.03782e-33	-0.322621	1	1	1.72414e-28	downregulated
DEK	1.07599e-32	0.598696	0.967	0.648	2.05268e-28	upregulated
PLP2	1.11339e-32	0.545248	0.909	0.352	2.12402e-28	upregulated
DLGAP5	1.13656e-32	0.613093	0.477	0.018	2.16822e-28	upregulated
DCTPP1	1.25189e-32	0.524309	0.712	0.163	2.38822e-28	upregulated
E2F1	1.28729e-32	0.384366	0.458	0.009	2.45576e-28	upregulated
CHAF1A	1.2915e-32	0.391129	0.523	0.035	2.4638e-28	upregulated
HIST1H1B	1.65887e-32	0.966552	0.492	0.031	3.16462e-28	upregulated
UQCRC1	1.77973e-32	0.422123	0.787	0.185	3.39518e-28	upregulated
IKZF3	1.81841e-32	-0.958631	0.338	0.639	3.46898e-28	downregulated
GGH	1.99641e-32	0.374758	0.482	0.022	3.80856e-28	upregulated
MLLT3	2.29596e-32	0.379439	0.677	0.119	4.38e-28	upregulated
AP2S1	2.44111e-32	0.515514	0.961	0.515	4.65691e-28	upregulated
IL4R	3.22792e-32	0.307371	0.604	0.079	6.1579e-28	upregulated
CYTIP	3.86651e-32	0.532331	0.952	0.441	7.37614e-28	upregulated
ATAD5	4.3846e-32	0.403614	0.514	0.035	8.36451e-28	upregulated
CARS	5.2429e-32	0.371407	0.675	0.115	1.00019e-27	upregulated
NCAPG	5.25336e-32	0.463779	0.473	0.018	1.00218e-27	upregulated
COPS3	8.233e-32	0.401319	0.763	0.176	1.57061e-27	upregulated
CD52	8.87187e-32	-0.47238	0.993	0.996	1.69249e-27	downregulated
SPC25	9.10793e-32	0.473345	0.47	0.018	1.73752e-27	upregulated
TMEM106C	9.3535e-32	0.487993	0.662	0.123	1.78437e-27	upregulated
HLA-DPB1	1.06879e-31	-0.760982	0.715	0.833	2.03893e-27	downregulated
SERBP1	1.11825e-31	0.540118	0.982	0.683	2.13329e-27	upregulated
LGALS3BP	1.15359e-31	0.384127	0.604	0.084	2.2007e-27	upregulated
NDUFB8	1.29423e-31	0.457396	0.985	0.767	2.469e-27	upregulated
RPL28	1.38546e-31	-0.264566	1	1	2.64304e-27	downregulated
POLR2H	1.43998e-31	0.515631	0.819	0.247	2.74705e-27	upregulated
RPL39L	1.55695e-31	0.334358	0.534	0.048	2.97019e-27	upregulated
CENPN	1.65131e-31	0.335048	0.521	0.044	3.15021e-27	upregulated
ACTR3	1.69456e-31	0.52095	0.982	0.652	3.23271e-27	upregulated
YEATS4	1.69751e-31	0.341536	0.66	0.115	3.23834e-27	upregulated
RPL10	1.85817e-31	-0.324693	1	1	3.54484e-27	downregulated
PSMB8	1.90947e-31	0.410378	0.996	0.903	3.64269e-27	upregulated
TUBB4B	1.91158e-31	1.00781	0.813	0.361	3.64673e-27	upregulated
PIGX	1.95444e-31	0.325083	0.593	0.079	3.72849e-27	upregulated
EGLN3	2.22597e-31	0.493381	0.434	0	4.24648e-27	upregulated
ARHGDIB	2.26622e-31	0.423191	0.993	0.96	4.32327e-27	upregulated
HNRNPA2B1	2.2891e-31	0.503524	0.993	0.943	4.36692e-27	upregulated
TCERG1	2.32464e-31	0.410228	0.673	0.128	4.43472e-27	upregulated
SAP30	2.37649e-31	0.382016	0.627	0.106	4.53364e-27	upregulated
CD3G	2.41998e-31	-0.595184	0.974	0.965	4.6166e-27	downregulated
CXCR3	2.45743e-31	0.494081	0.791	0.225	4.68804e-27	upregulated
LINC00861	2.75773e-31	-0.772425	0.17	0.511	5.26092e-27	downregulated
NUP37	2.95771e-31	0.350613	0.662	0.115	5.64243e-27	upregulated
HINT2	2.96252e-31	0.422104	0.806	0.211	5.6516e-27	upregulated
RNASEH2A	3.20932e-31	0.393581	0.595	0.079	6.12242e-27	upregulated
HAUS1	3.93775e-31	0.38293	0.747	0.172	7.51204e-27	upregulated
KNL1	4.48834e-31	0.501242	0.492	0.031	8.5624e-27	upregulated
GPX4	4.60028e-31	0.495782	0.961	0.493	8.77596e-27	upregulated
ENO2	4.88403e-31	0.352155	0.503	0.035	9.31726e-27	upregulated
ORC6	5.52991e-31	0.390183	0.532	0.053	1.05494e-26	upregulated
MND1	5.89394e-31	0.350084	0.458	0.018	1.12439e-26	upregulated
CYSTM1	6.282e-31	0.310529	0.521	0.044	1.19842e-26	upregulated
CDCA8	7.12157e-31	0.419285	0.464	0.022	1.35858e-26	upregulated
SRSF2	7.58273e-31	0.573776	0.945	0.59	1.44656e-26	upregulated
HOPX	7.71329e-31	0.671242	0.902	0.423	1.47146e-26	upregulated
HELLS	1.12417e-30	0.4913	0.662	0.137	2.14459e-26	upregulated
BUB1	1.13681e-30	0.365141	0.457	0.018	2.16869e-26	upregulated
MCM3	1.16257e-30	0.527231	0.697	0.172	2.21784e-26	upregulated
CIP2A	1.21514e-30	0.344284	0.471	0.022	2.31813e-26	upregulated
ATF4	1.28573e-30	0.464622	0.847	0.247	2.45279e-26	upregulated
CORO1B	1.32875e-30	0.590786	0.741	0.198	2.53485e-26	upregulated
ERH	1.36212e-30	0.512425	0.959	0.577	2.59852e-26	upregulated
SNRPA1	1.53767e-30	0.507645	0.811	0.242	2.93342e-26	upregulated
KIFC1	1.56247e-30	0.423022	0.455	0.018	2.98072e-26	upregulated
KIF2C	1.58539e-30	0.417333	0.444	0.013	3.02444e-26	upregulated
RAD51AP1	1.60803e-30	0.372536	0.484	0.031	3.06764e-26	upregulated
CTSH	1.72023e-30	0.488591	0.453	0.013	3.28169e-26	upregulated
C9orf40	1.76522e-30	0.296902	0.451	0.013	3.36751e-26	upregulated
STIP1	1.94677e-30	0.486888	0.767	0.207	3.71386e-26	upregulated
ASL	2.05135e-30	0.286592	0.501	0.035	3.91337e-26	upregulated
MMD	2.09061e-30	0.304426	0.462	0.018	3.98825e-26	upregulated
MRPL51	2.27352e-30	0.508562	0.963	0.604	4.33719e-26	upregulated
ALAS1	2.45893e-30	0.283394	0.512	0.04	4.69091e-26	upregulated
PSMB5	2.50335e-30	0.379422	0.739	0.172	4.77565e-26	upregulated
RPS26	2.71012e-30	-0.790041	0.998	1	5.17009e-26	downregulated
TIPIN	2.83505e-30	0.316596	0.462	0.018	5.40842e-26	upregulated
RAB33A	2.99777e-30	0.318446	0.582	0.079	5.71884e-26	upregulated
RFC4	3.78692e-30	0.393103	0.632	0.115	7.22431e-26	upregulated
KIF15	3.96551e-30	0.401296	0.442	0.013	7.56501e-26	upregulated
FAM162A	4.67203e-30	0.835648	0.835	0.322	8.91282e-26	upregulated
LMO4	4.7469e-30	0.384021	0.726	0.159	9.05566e-26	upregulated
PRIM1	4.98304e-30	0.307006	0.54	0.062	9.50614e-26	upregulated
CD59	5.18867e-30	0.376906	0.638	0.11	9.89843e-26	upregulated
C20orf204	5.73076e-30	0.378809	0.429	0.004	1.09326e-25	upregulated
CDC45	7.54746e-30	0.358192	0.433	0.009	1.43983e-25	upregulated
RPN2	7.61042e-30	0.505923	0.889	0.361	1.45184e-25	upregulated
HLA-B	8.2622e-30	-0.324908	1	1	1.57618e-25	downregulated
FANCI	8.42245e-30	0.386334	0.534	0.057	1.60675e-25	upregulated
PHLDA1	9.15599e-30	0.44218	0.523	0.053	1.74669e-25	upregulated
MTHFD2	1.07719e-29	0.387374	0.68	0.141	2.05495e-25	upregulated
FDPS	1.12611e-29	0.53294	0.896	0.414	2.14828e-25	upregulated
CENPA	1.16171e-29	0.47409	0.438	0.013	2.2162e-25	upregulated
CARD19	1.28361e-29	0.321695	0.617	0.101	2.44874e-25	upregulated
BLM	1.4914e-29	0.316989	0.506	0.044	2.84514e-25	upregulated
PDXK	1.52362e-29	0.308826	0.675	0.128	2.90662e-25	upregulated
MRPL28	1.54636e-29	0.417288	0.845	0.26	2.95e-25	upregulated
P2RX4	1.56593e-29	0.292848	0.488	0.035	2.98732e-25	upregulated
RPA1	1.81156e-29	0.356525	0.71	0.154	3.45591e-25	upregulated
ATP5C1	1.8756e-29	0.480122	0.969	0.568	3.57808e-25	upregulated
BRCA1	1.91612e-29	0.339257	0.499	0.044	3.65539e-25	upregulated
MRPS25	1.94183e-29	0.323145	0.566	0.079	3.70443e-25	upregulated
CLIC3	1.95101e-29	-0.902229	0.189	0.533	3.72195e-25	downregulated
EXOSC3	2.12866e-29	0.355187	0.691	0.141	4.06084e-25	upregulated
ATAD2	2.33656e-29	0.485336	0.632	0.123	4.45746e-25	upregulated
UBA3	2.39951e-29	0.305216	0.604	0.097	4.57755e-25	upregulated
CDCA3	3.51465e-29	0.434757	0.44	0.018	6.70489e-25	upregulated
SFXN1	3.74817e-29	0.447564	0.784	0.22	7.15038e-25	upregulated
MTDH	4.03448e-29	0.501372	0.972	0.599	7.69658e-25	upregulated
POP7	5.02398e-29	0.352201	0.704	0.159	9.58424e-25	upregulated
BAD	5.06153e-29	0.309041	0.701	0.154	9.65588e-25	upregulated
PSMD3	5.61544e-29	0.401084	0.68	0.15	1.07126e-24	upregulated
AHCY	5.68774e-29	0.326334	0.497	0.044	1.08505e-24	upregulated
PNP	6.06983e-29	0.392498	0.8	0.225	1.15794e-24	upregulated
AURKAIP1	6.57951e-29	0.508731	0.956	0.524	1.25517e-24	upregulated
NPM1	6.66025e-29	0.536879	0.996	0.974	1.27058e-24	upregulated
PFDN5	6.68742e-29	-0.43009	0.998	0.987	1.27576e-24	downregulated
ESCO2	6.88109e-29	0.400977	0.447	0.022	1.31271e-24	upregulated
RPL26L1	7.04765e-29	0.361953	0.719	0.159	1.34448e-24	upregulated
TAB2	8.90228e-29	0.347436	0.688	0.145	1.69829e-24	upregulated
SLC2A3	9.36365e-29	0.43555	0.834	0.256	1.7863e-24	upregulated
FOXM1	9.48889e-29	0.350042	0.445	0.022	1.8102e-24	upregulated
ACTL6A	9.50099e-29	0.308518	0.617	0.11	1.8125e-24	upregulated
BRI3BP	1.01892e-28	0.309116	0.506	0.048	1.94379e-24	upregulated
DTYMK	1.2305e-28	0.46593	0.667	0.154	2.34743e-24	upregulated
ARHGDIA	1.27049e-28	0.495848	0.959	0.476	2.42372e-24	upregulated
CCT7	1.34336e-28	0.513283	0.871	0.366	2.56273e-24	upregulated
TMPO	1.38432e-28	0.54178	0.806	0.3	2.64088e-24	upregulated
RAB1A	1.49956e-28	0.318939	0.652	0.128	2.8607e-24	upregulated
RAC2	1.69821e-28	0.399814	0.996	0.938	3.23968e-24	upregulated
GRPEL1	1.99856e-28	0.333631	0.68	0.141	3.81264e-24	upregulated
PSMA3	2.0863e-28	0.520577	0.915	0.489	3.98004e-24	upregulated
JOSD2	3.32422e-28	0.319559	0.697	0.154	6.34161e-24	upregulated
LGALS3	3.6852e-28	0.835564	0.658	0.198	7.03025e-24	upregulated
RBX1	3.79082e-28	0.411025	0.978	0.709	7.23175e-24	upregulated
LINC02446	4.21464e-28	0.367824	0.51	0.057	8.04028e-24	upregulated
PHGDH	4.77627e-28	0.3635	0.488	0.048	9.11169e-24	upregulated
MCM5	5.17649e-28	0.493725	0.652	0.15	9.87519e-24	upregulated
CCL4L2	5.36058e-28	-0.655874	0.013	0.251	1.02264e-23	downregulated
SRSF3	5.65898e-28	0.485141	0.972	0.762	1.07956e-23	upregulated
PPA1	5.91933e-28	0.488918	0.908	0.396	1.12923e-23	upregulated
KIF3A	5.92808e-28	0.315402	0.518	0.057	1.1309e-23	upregulated
BRIX1	7.05136e-28	0.366858	0.641	0.141	1.34519e-23	upregulated
TOMM7	7.11214e-28	-0.541042	0.989	0.912	1.35678e-23	downregulated
SEC14L1	7.84933e-28	0.287465	0.634	0.115	1.49742e-23	upregulated
TRAT1	7.86445e-28	0.411159	0.675	0.159	1.5003e-23	upregulated
INTS13	8.07118e-28	0.283063	0.471	0.04	1.53974e-23	upregulated
ZBTB32	8.13203e-28	0.354174	0.438	0.022	1.55135e-23	upregulated
MAST4	8.44202e-28	0.284555	0.414	0.009	1.61048e-23	upregulated
RPL11	9.36698e-28	-0.283951	1	1	1.78694e-23	downregulated
ZNF593	9.4819e-28	0.315895	0.571	0.088	1.80886e-23	upregulated
MPI	1.00736e-27	0.289651	0.58	0.093	1.92174e-23	upregulated
PSMD7	1.13703e-27	0.479819	0.928	0.467	2.16912e-23	upregulated
LAGE3	1.17407e-27	0.362804	0.804	0.225	2.23977e-23	upregulated
ADSL	1.26527e-27	0.28242	0.621	0.11	2.41375e-23	upregulated
RBBP8	1.32204e-27	0.323208	0.47	0.04	2.52206e-23	upregulated
TRBC2	1.36249e-27	-0.748851	0.939	0.952	2.59922e-23	downregulated
TROAP	1.4073e-27	0.349508	0.423	0.018	2.6847e-23	upregulated
PSMG1	1.48391e-27	0.28546	0.623	0.11	2.83086e-23	upregulated
MDH1	1.58594e-27	0.46889	0.937	0.41	3.02551e-23	upregulated
EIF3B	1.59717e-27	0.371479	0.715	0.176	3.04692e-23	upregulated
ELOC	1.60056e-27	0.469915	0.939	0.441	3.0534e-23	upregulated
CBFB	1.65605e-27	0.395112	0.723	0.185	3.15924e-23	upregulated
PPCDC	1.78393e-27	0.282842	0.503	0.053	3.40321e-23	upregulated
PRPF19	1.87099e-27	0.322443	0.595	0.106	3.56929e-23	upregulated
FAM207A	2.01772e-27	0.332781	0.778	0.203	3.8492e-23	upregulated
OXNAD1	2.07747e-27	0.324811	0.702	0.159	3.9632e-23	upregulated
YWHAH	2.11927e-27	0.496873	0.817	0.3	4.04293e-23	upregulated
AURKA	2.1568e-27	0.432429	0.445	0.031	4.11454e-23	upregulated
NSD2	2.17509e-27	0.34199	0.569	0.097	4.14942e-23	upregulated
HSP90AB1	2.22966e-27	0.796354	0.98	0.762	4.25353e-23	upregulated
HAUS8	2.34677e-27	0.262295	0.482	0.048	4.47694e-23	upregulated
SLBP	2.40306e-27	0.498292	0.723	0.211	4.58431e-23	upregulated
DNAJC9	2.41332e-27	0.423703	0.671	0.154	4.60389e-23	upregulated
YWHAG	2.62996e-27	0.308414	0.527	0.066	5.01717e-23	upregulated
ILK	2.88495e-27	0.401324	0.841	0.256	5.50362e-23	upregulated
MSI2	2.94596e-27	0.361119	0.767	0.207	5.62001e-23	upregulated
DUSP4	3.06819e-27	0.367559	0.481	0.044	5.8532e-23	upregulated
DNPH1	3.29908e-27	0.351998	0.808	0.225	6.29365e-23	upregulated
GMPS	3.97331e-27	0.358982	0.715	0.181	7.57988e-23	upregulated
KIF22	4.33208e-27	0.393139	0.577	0.101	8.26432e-23	upregulated
ARL2	4.64718e-27	0.330701	0.739	0.185	8.86542e-23	upregulated
HIRIP3	4.66816e-27	0.311768	0.599	0.106	8.90544e-23	upregulated
PSMD1	5.07544e-27	0.418195	0.78	0.233	9.68242e-23	upregulated
RBM3	5.22378e-27	0.477207	0.965	0.63	9.96541e-23	upregulated
PXMP2	6.09248e-27	0.281111	0.495	0.057	1.16226e-22	upregulated
IMMT	6.60579e-27	0.376997	0.793	0.229	1.26019e-22	upregulated
RASGRP1	6.66355e-27	0.51087	0.946	0.432	1.27121e-22	upregulated
DHX15	6.82153e-27	0.300074	0.619	0.119	1.30134e-22	upregulated
ARHGAP11A	6.8628e-27	0.332928	0.462	0.04	1.30922e-22	upregulated
UGP2	7.09153e-27	0.43785	0.884	0.317	1.35285e-22	upregulated
RGCC	7.32924e-27	0.299542	0.569	0.093	1.3982e-22	upregulated
PSMA4	7.4394e-27	0.477346	0.954	0.564	1.41921e-22	upregulated
NIT2	7.48099e-27	0.285166	0.582	0.097	1.42715e-22	upregulated
LRRC59	7.66609e-27	0.298097	0.625	0.119	1.46246e-22	upregulated
APOBEC3H	7.98218e-27	0.398624	0.63	0.132	1.52276e-22	upregulated
KPNA2	8.70103e-27	0.722651	0.649	0.172	1.6599e-22	upregulated
HDGF	8.82642e-27	0.427988	0.776	0.233	1.68382e-22	upregulated
POLR3K	9.0757e-27	0.328728	0.715	0.172	1.73137e-22	upregulated
USP1	9.9178e-27	0.406179	0.743	0.207	1.89202e-22	upregulated
NCAPG2	1.0371e-26	0.279507	0.436	0.026	1.97847e-22	upregulated
ACADVL	1.15797e-26	0.377728	0.795	0.229	2.20906e-22	upregulated
FH	1.23732e-26	0.307534	0.571	0.097	2.36043e-22	upregulated
DPM2	1.23794e-26	0.293252	0.641	0.132	2.36162e-22	upregulated
PSMD11	1.24737e-26	0.418334	0.799	0.238	2.37961e-22	upregulated
DNMT1	1.33905e-26	0.473153	0.826	0.3	2.55451e-22	upregulated
SCD	1.42251e-26	0.286155	0.414	0.018	2.71372e-22	upregulated
PLK1	1.45956e-26	0.552329	0.407	0.018	2.7844e-22	upregulated
WDR76	1.56213e-26	0.316105	0.51	0.066	2.98008e-22	upregulated
EXOSC8	1.62738e-26	0.421181	0.747	0.216	3.10455e-22	upregulated
SAC3D1	2.37203e-26	0.326606	0.551	0.093	4.52513e-22	upregulated
RACGAP1	2.4479e-26	0.327466	0.447	0.035	4.66986e-22	upregulated
ANAPC15	2.53498e-26	0.329471	0.734	0.189	4.83599e-22	upregulated
FARSA	2.64245e-26	0.269541	0.616	0.115	5.041e-22	upregulated
RPP30	2.84628e-26	0.264256	0.569	0.093	5.42985e-22	upregulated
NOP56	2.8512e-26	0.492641	0.823	0.295	5.43922e-22	upregulated
DEPDC1B	2.99008e-26	0.280649	0.39	0.009	5.70417e-22	upregulated
HAX1	3.13666e-26	0.389616	0.852	0.295	5.9838e-22	upregulated
NCAPD2	3.22965e-26	0.305816	0.603	0.115	6.16119e-22	upregulated
SPC24	3.25074e-26	0.266607	0.392	0.009	6.20143e-22	upregulated
RPS14	3.74475e-26	-0.291834	1	1	7.14386e-22	downregulated
ATP5A1	4.28844e-26	0.400987	0.957	0.52	8.18106e-22	upregulated
PPT1	4.5436e-26	0.285834	0.678	0.154	8.66782e-22	upregulated
CENPE	4.76127e-26	0.51211	0.494	0.066	9.08307e-22	upregulated
SINHCAF	5.47672e-26	0.316072	0.706	0.181	1.04479e-21	upregulated
HSPA9	5.56707e-26	0.429206	0.797	0.264	1.06203e-21	upregulated
GPX1	6.0806e-26	0.435243	0.861	0.313	1.16e-21	upregulated
MCM10	6.10575e-26	0.294803	0.401	0.018	1.16479e-21	upregulated
VRK1	6.31626e-26	0.401131	0.713	0.189	1.20495e-21	upregulated
UBE2N	6.34033e-26	0.463431	0.911	0.445	1.20954e-21	upregulated
CREM	6.49217e-26	0.251991	0.625	0.128	1.23851e-21	upregulated
CDCA4	6.52781e-26	0.320356	0.542	0.088	1.24531e-21	upregulated
MRPL27	6.6061e-26	0.392231	0.819	0.26	1.26025e-21	upregulated
TOMM40	6.94031e-26	0.37125	0.671	0.159	1.324e-21	upregulated
TANK	7.14774e-26	0.361884	0.776	0.229	1.36357e-21	upregulated
BARD1	7.32599e-26	0.310641	0.545	0.093	1.39758e-21	upregulated
WDR34	7.98572e-26	0.272209	0.46	0.044	1.52344e-21	upregulated
MOSPD3	8.08461e-26	0.349414	0.645	0.145	1.5423e-21	upregulated
RAD51	8.72822e-26	0.268747	0.429	0.031	1.66508e-21	upregulated
POLR2E	8.74434e-26	0.41886	0.841	0.282	1.66816e-21	upregulated
PTGER2	8.90176e-26	0.431444	0.832	0.269	1.69819e-21	upregulated
XRCC6	8.95375e-26	0.455201	0.915	0.449	1.70811e-21	upregulated
FUT8	9.25672e-26	0.292529	0.649	0.141	1.7659e-21	upregulated
LIG1	9.57458e-26	0.289111	0.497	0.066	1.82654e-21	upregulated
COPRS	1.05049e-25	0.260221	0.505	0.066	2.00401e-21	upregulated
CDC6	1.08642e-25	0.337629	0.394	0.013	2.07256e-21	upregulated
TRGC2	1.17101e-25	-0.967968	0.285	0.577	2.23394e-21	downregulated
KIF23	1.20735e-25	0.372734	0.384	0.009	2.30327e-21	upregulated
KDELR1	1.22169e-25	0.361517	0.817	0.247	2.33062e-21	upregulated
CKAP2L	1.46114e-25	0.345587	0.405	0.018	2.78741e-21	upregulated
TACC3	1.52285e-25	0.420964	0.591	0.123	2.90514e-21	upregulated
PTP4A1	1.58959e-25	0.287289	0.643	0.137	3.03246e-21	upregulated
NUDT21	1.64293e-25	0.400683	0.81	0.251	3.13421e-21	upregulated
CCT5	1.74492e-25	0.520875	0.895	0.471	3.32878e-21	upregulated
SF3A3	1.79207e-25	0.321194	0.723	0.185	3.41873e-21	upregulated
TESC	1.89905e-25	0.437025	0.793	0.251	3.62281e-21	upregulated
GNB2	2.08181e-25	0.445474	0.93	0.445	3.97147e-21	upregulated
RPL31	2.19042e-25	-0.433725	0.985	0.987	4.17866e-21	downregulated
PSMA7	2.56154e-25	0.376273	0.994	0.93	4.88664e-21	upregulated
MIS18A	2.62137e-25	0.257864	0.444	0.035	5.00078e-21	upregulated
RNASEH1	3.00372e-25	0.264497	0.593	0.115	5.73019e-21	upregulated
MPST	3.05096e-25	0.298043	0.697	0.167	5.82032e-21	upregulated
CDCA7L	3.49354e-25	0.258972	0.423	0.026	6.66463e-21	upregulated
FAM105A	3.65402e-25	0.269816	0.586	0.115	6.97077e-21	upregulated
SRP72	3.78535e-25	0.429115	0.871	0.33	7.22131e-21	upregulated
UHRF1	3.98671e-25	0.290272	0.405	0.022	7.60545e-21	upregulated
FBL	4.02566e-25	0.441263	0.856	0.335	7.67975e-21	upregulated
PSMB6	4.07123e-25	0.433124	0.954	0.586	7.76669e-21	upregulated
EIF4EBP1	4.19602e-25	0.257415	0.494	0.062	8.00476e-21	upregulated
RAD51C	4.21921e-25	0.264102	0.584	0.11	8.049e-21	upregulated
PRKX	4.69334e-25	0.288182	0.603	0.119	8.95349e-21	upregulated
ITGB3BP	5.03691e-25	0.311392	0.601	0.119	9.60892e-21	upregulated
PHB2	5.11207e-25	0.446935	0.891	0.37	9.75229e-21	upregulated
P4HA1	5.35727e-25	0.309748	0.453	0.044	1.02201e-20	upregulated
FBXO5	5.65456e-25	0.393031	0.505	0.079	1.07872e-20	upregulated
MRPL35	5.80191e-25	0.262981	0.647	0.137	1.10683e-20	upregulated
PBK	6.94037e-25	0.290755	0.377	0.009	1.32402e-20	upregulated
EMC9	7.42676e-25	0.251762	0.473	0.057	1.4168e-20	upregulated
PRELID1	7.60713e-25	0.464574	0.97	0.705	1.45121e-20	upregulated
FYN	7.93372e-25	-0.762813	0.497	0.656	1.51352e-20	downregulated
STT3B	8.51918e-25	0.293335	0.636	0.141	1.6252e-20	upregulated
NOB1	8.84755e-25	0.255769	0.608	0.123	1.68785e-20	upregulated
EIF4E	8.96833e-25	0.281476	0.741	0.198	1.71089e-20	upregulated
HACD3	9.35524e-25	0.285921	0.614	0.132	1.7847e-20	upregulated
RIOK1	9.6602e-25	0.250257	0.486	0.062	1.84288e-20	upregulated
CRIP1	1.1187e-24	-0.725854	0.776	0.771	2.13415e-20	downregulated
FDFT1	1.14336e-24	0.403919	0.795	0.26	2.18118e-20	upregulated
HSPA14	1.18624e-24	0.260291	0.523	0.079	2.26299e-20	upregulated
GARS	1.19783e-24	0.330113	0.621	0.141	2.2851e-20	upregulated
STK17B	1.28334e-24	0.529212	0.965	0.515	2.44822e-20	upregulated
RNASEH2C	1.40991e-24	0.4452	0.902	0.414	2.68969e-20	upregulated
NOSIP	1.42391e-24	0.501998	0.969	0.551	2.7164e-20	upregulated
WDR1	1.4355e-24	0.428603	0.909	0.441	2.7385e-20	upregulated
PRSS23	1.46103e-24	-0.528374	0.028	0.26	2.7872e-20	downregulated
BOLA3	1.47692e-24	0.351424	0.774	0.233	2.81753e-20	upregulated
DBNL	1.4879e-24	0.390246	0.863	0.291	2.83847e-20	upregulated
MTX1	1.48864e-24	0.272528	0.66	0.15	2.83989e-20	upregulated
CCDC85B	1.54837e-24	0.467698	0.965	0.621	2.95382e-20	upregulated
ARPC2	1.56939e-24	0.322478	0.998	0.982	2.99392e-20	upregulated
RPS12	1.80137e-24	-0.260551	1	1	3.43647e-20	downregulated
PLEKHO1	1.81549e-24	0.321501	0.704	0.185	3.46341e-20	upregulated
AQP3	1.8237e-24	0.618458	0.497	0.079	3.47906e-20	upregulated
KMT5A	1.93835e-24	0.261457	0.475	0.057	3.69779e-20	upregulated
ACOT7	1.95689e-24	0.268725	0.547	0.093	3.73315e-20	upregulated
GIMAP7	2.01392e-24	-0.562237	0.965	0.965	3.84196e-20	downregulated
DEGS1	2.16207e-24	0.342423	0.81	0.256	4.12457e-20	upregulated
MCTS1	2.477e-24	0.336695	0.821	0.26	4.72537e-20	upregulated
LYAR	2.60945e-24	-0.805471	0.623	0.718	4.97804e-20	downregulated
CCT6A	2.87371e-24	0.460708	0.843	0.33	5.48218e-20	upregulated
PRMT1	2.90091e-24	0.466131	0.858	0.339	5.53407e-20	upregulated
BACH2	2.90201e-24	0.279704	0.362	0.004	5.53617e-20	upregulated
KNSTRN	2.95209e-24	0.308526	0.412	0.031	5.63171e-20	upregulated
PRELID3B	3.09008e-24	0.285656	0.691	0.181	5.89495e-20	upregulated
RTCA	3.14709e-24	0.309613	0.665	0.163	6.00371e-20	upregulated
GMPPB	3.35241e-24	0.258821	0.51	0.075	6.39539e-20	upregulated
CDCA2	3.6876e-24	0.341456	0.386	0.018	7.03484e-20	upregulated
AKR1A1	3.77219e-24	0.312815	0.774	0.229	7.1962e-20	upregulated
CD3D	4.61958e-24	-0.394987	0.998	0.996	8.81278e-20	downregulated
HMGXB4	5.03626e-24	0.253357	0.612	0.128	9.60768e-20	upregulated
PABPC1	5.8374e-24	0.429616	0.989	0.709	1.1136e-19	upregulated
PTBP1	6.26609e-24	0.363502	0.745	0.225	1.19538e-19	upregulated
SYNCRIP	6.53789e-24	0.374383	0.837	0.308	1.24723e-19	upregulated
ATP5D	6.83418e-24	0.365049	0.989	0.819	1.30376e-19	upregulated
HJURP	6.96016e-24	0.337674	0.379	0.018	1.32779e-19	upregulated
HDAC2	7.50063e-24	0.282824	0.678	0.172	1.43089e-19	upregulated
HMGN5	9.47399e-24	0.296195	0.346	0	1.80735e-19	upregulated
ILF2	9.4875e-24	0.429889	0.843	0.339	1.80993e-19	upregulated
HRAS	9.53135e-24	0.251596	0.569	0.11	1.8183e-19	upregulated
RPS17	9.66114e-24	0.451278	0.994	0.938	1.84306e-19	upregulated
DPM1	1.04849e-23	0.25995	0.614	0.132	2.0002e-19	upregulated
VCP	1.08404e-23	0.430861	0.852	0.326	2.06803e-19	upregulated
TMUB1	1.10914e-23	0.275323	0.743	0.203	2.1159e-19	upregulated
ETHE1	1.12595e-23	0.333148	0.797	0.256	2.14798e-19	upregulated
MRPL18	1.14467e-23	0.398039	0.81	0.273	2.1837e-19	upregulated
AHCYL1	1.14495e-23	0.251355	0.614	0.132	2.18422e-19	upregulated
TIMM17A	1.16041e-23	0.311048	0.728	0.207	2.21372e-19	upregulated
DTL	1.27047e-23	0.291169	0.383	0.022	2.42367e-19	upregulated
HPGD	1.38763e-23	0.474521	0.597	0.145	2.64718e-19	upregulated
GNAI2	1.42543e-23	0.395804	0.989	0.806	2.7193e-19	upregulated
PDE7A	1.49873e-23	0.280007	0.651	0.163	2.85912e-19	upregulated
FAM111B	1.53717e-23	0.399463	0.37	0.018	2.93245e-19	upregulated
HM13	1.66517e-23	0.339755	0.719	0.203	3.17665e-19	upregulated
CD3E	1.77747e-23	-0.418912	0.993	0.974	3.39088e-19	downregulated
C1QBP	1.78395e-23	0.557324	0.869	0.441	3.40324e-19	upregulated
MANF	1.79264e-23	0.489958	0.865	0.401	3.41983e-19	upregulated
GOT2	1.8116e-23	0.25918	0.508	0.084	3.45599e-19	upregulated
MTHFD1	1.95277e-23	0.252298	0.549	0.101	3.7253e-19	upregulated
XCL1	2.13749e-23	0.855867	0.364	0.013	4.07769e-19	upregulated
DKC1	2.59665e-23	0.309199	0.617	0.141	4.95362e-19	upregulated
EZH2	2.76676e-23	0.360449	0.643	0.167	5.27814e-19	upregulated
NXT1	2.97667e-23	0.273617	0.612	0.137	5.6786e-19	upregulated
PRR5L	3.06713e-23	-0.434236	0.02	0.233	5.85117e-19	downregulated
PYCR2	3.19384e-23	0.255576	0.647	0.154	6.09289e-19	upregulated
PFKP	3.21858e-23	0.339909	0.743	0.229	6.14008e-19	upregulated
UBE2M	3.42148e-23	0.410884	0.896	0.383	6.52715e-19	upregulated
SPINT2	3.72689e-23	0.29583	0.338	0	7.10978e-19	upregulated
WARS	3.81522e-23	0.280296	0.503	0.079	7.2783e-19	upregulated
SLC1A5	4.00099e-23	0.288273	0.534	0.101	7.63268e-19	upregulated
KIF14	4.39142e-23	0.366631	0.351	0.009	8.37751e-19	upregulated
VDAC2	4.43089e-23	0.422121	0.909	0.419	8.4528e-19	upregulated
ANXA1	5.00234e-23	-0.685109	0.86	0.837	9.54296e-19	downregulated
KRT7	5.23735e-23	0.339915	0.336	0	9.9913e-19	upregulated
NUDT5	5.43283e-23	0.389422	0.872	0.335	1.03642e-18	upregulated
MAGOHB	5.57603e-23	0.313637	0.64	0.154	1.06374e-18	upregulated
HIST1H2AG	6.04116e-23	0.338346	0.44	0.053	1.15247e-18	upregulated
SNRPF	6.46198e-23	0.368471	0.961	0.656	1.23275e-18	upregulated
PSMA2	6.50935e-23	0.396438	0.943	0.573	1.24179e-18	upregulated
PABPC4	6.58836e-23	0.256809	0.505	0.084	1.25686e-18	upregulated
PDE4D	7.01729e-23	0.265427	0.534	0.101	1.33869e-18	upregulated
SMC3	7.41569e-23	0.419509	0.834	0.326	1.41469e-18	upregulated
C1orf35	7.76487e-23	0.255503	0.638	0.145	1.4813e-18	upregulated
CHD4	8.0305e-23	0.352742	0.823	0.291	1.53198e-18	upregulated
HIST1H4C	8.26871e-23	1.58865	0.874	0.537	1.57742e-18	upregulated
SLC25A11	8.2787e-23	0.304361	0.736	0.22	1.57933e-18	upregulated
MRTO4	8.69144e-23	0.349708	0.543	0.115	1.65807e-18	upregulated
URM1	9.5083e-23	0.258458	0.708	0.189	1.8139e-18	upregulated
HERC5	1.0348e-22	0.308331	0.466	0.066	1.97408e-18	upregulated
AK2	1.04275e-22	0.279153	0.658	0.167	1.98926e-18	upregulated
PSMB1	1.11801e-22	0.365188	0.989	0.736	2.13283e-18	upregulated
THEMIS	1.21479e-22	0.275587	0.813	0.26	2.31745e-18	upregulated
PRR11	1.22555e-22	0.297315	0.375	0.022	2.33799e-18	upregulated
NUDC	1.2782e-22	0.43505	0.88	0.414	2.43843e-18	upregulated
SMAP1	1.28238e-22	0.315345	0.786	0.251	2.44639e-18	upregulated
ABHD17A	1.29996e-22	-0.613145	0.885	0.784	2.47993e-18	downregulated
DIAPH3	1.42788e-22	0.26213	0.346	0.009	2.72397e-18	upregulated
TIPRL	1.51793e-22	0.285053	0.789	0.251	2.89576e-18	upregulated
ETS1	1.52303e-22	-0.513517	0.913	0.855	2.90548e-18	downregulated
YBX3	1.67218e-22	0.368543	0.815	0.295	3.19001e-18	upregulated
S1PR5	1.74386e-22	-0.317767	0.004	0.181	3.32676e-18	downregulated
UBE2L3	1.83403e-22	0.399336	0.959	0.617	3.49878e-18	upregulated
FCRL6	1.84395e-22	-0.306115	0	0.167	3.51771e-18	downregulated
BAZ1B	1.9599e-22	0.317609	0.736	0.22	3.73889e-18	upregulated
EBNA1BP2	1.96608e-22	0.31245	0.656	0.176	3.7507e-18	upregulated
MXD3	2.08714e-22	0.366733	0.392	0.031	3.98163e-18	upregulated
CCNF	2.14567e-22	0.291487	0.377	0.022	4.09329e-18	upregulated
CENPX	2.17738e-22	0.387456	0.774	0.26	4.15379e-18	upregulated
HILPDA	2.2977e-22	0.344218	0.338	0.004	4.38333e-18	upregulated
NUCB1	2.55384e-22	0.334112	0.884	0.33	4.87197e-18	upregulated
PDCD5	2.74809e-22	0.399039	0.917	0.419	5.24254e-18	upregulated
CCDC28B	2.77935e-22	0.250748	0.743	0.211	5.30217e-18	upregulated
HIC1	2.80227e-22	0.287374	0.353	0.013	5.3459e-18	upregulated
E2F2	3.0414e-22	0.262906	0.405	0.04	5.80209e-18	upregulated
TCP1	3.19539e-22	0.399541	0.804	0.286	6.09585e-18	upregulated
RPS13	3.28098e-22	-0.277354	1	1	6.25912e-18	downregulated
MRPS11	3.28892e-22	0.306037	0.78	0.242	6.27428e-18	upregulated
CCT3	3.38589e-22	0.461516	0.913	0.498	6.45925e-18	upregulated
HSPE1	3.58194e-22	0.575477	0.932	0.621	6.83327e-18	upregulated
IL18R1	3.61641e-22	0.297898	0.346	0.009	6.89902e-18	upregulated
CA6	3.96193e-22	0.31408	0.325	0	7.55816e-18	upregulated
C1orf43	4.12843e-22	0.315014	0.786	0.251	7.87581e-18	upregulated
KPNB1	4.77502e-22	0.445216	0.854	0.383	9.1093e-18	upregulated
STOML2	4.81758e-22	0.37824	0.848	0.322	9.19049e-18	upregulated
FKBP4	4.88705e-22	0.274553	0.521	0.101	9.32302e-18	upregulated
HNRNPA1	5.82076e-22	0.328425	0.996	0.916	1.11043e-17	upregulated
ELAVL1	5.82553e-22	0.26531	0.734	0.211	1.11134e-17	upregulated
POLD2	5.82847e-22	0.274781	0.562	0.123	1.1119e-17	upregulated
FKBP1A	6.11499e-22	0.40746	0.948	0.595	1.16656e-17	upregulated
TPRKB	6.35449e-22	0.264323	0.784	0.247	1.21225e-17	upregulated
CBX1	6.48949e-22	0.259322	0.619	0.15	1.238e-17	upregulated
S100A4	7.08679e-22	-0.383545	0.993	1	1.35195e-17	downregulated
TXNRD1	7.21401e-22	0.31142	0.636	0.163	1.37622e-17	upregulated
HIST1H1C	7.36598e-22	0.712273	0.75	0.326	1.40521e-17	upregulated
NUDT22	7.59984e-22	0.267353	0.726	0.207	1.44982e-17	upregulated
LYZ	8.06499e-22	-0.327301	0.004	0.176	1.53856e-17	downregulated
EIF2S2	8.16221e-22	0.370358	0.935	0.537	1.55711e-17	upregulated
MRPL23	8.27e-22	0.294724	0.745	0.22	1.57767e-17	upregulated
CKAP5	8.40463e-22	0.280561	0.497	0.088	1.60335e-17	upregulated
RPL12	8.42515e-22	-0.28189	1	1	1.60727e-17	downregulated
VAMP2	8.75773e-22	-0.597784	0.778	0.78	1.67071e-17	downregulated
PTMS	9.19915e-22	-0.776188	0.506	0.678	1.75492e-17	downregulated
HIST1H3G	9.61198e-22	0.283011	0.344	0.013	1.83368e-17	upregulated
UBE2A	9.93957e-22	0.324846	0.83	0.291	1.89617e-17	upregulated
EIF1AX	1.05696e-21	0.370821	0.797	0.295	2.01636e-17	upregulated
AP1S1	1.36688e-21	0.253423	0.712	0.198	2.6076e-17	upregulated
PNRC1	1.4404e-21	-0.82324	0.699	0.714	2.74785e-17	downregulated
RPAIN	1.47592e-21	0.277796	0.739	0.225	2.81562e-17	upregulated
VDAC3	1.47919e-21	0.395856	0.908	0.423	2.82185e-17	upregulated
ESD	1.63067e-21	0.331669	0.771	0.26	3.11082e-17	upregulated
SNRNP40	1.72218e-21	0.305868	0.726	0.207	3.28539e-17	upregulated
JPT1	1.90387e-21	0.511738	0.943	0.661	3.63201e-17	upregulated
MAT2A	1.92453e-21	0.25942	0.66	0.172	3.67143e-17	upregulated
CEP57	1.99065e-21	0.26754	0.719	0.216	3.79757e-17	upregulated
RPS11	2.01886e-21	0.279673	1	0.996	3.85137e-17	upregulated
ZDHHC12	2.27557e-21	0.345041	0.767	0.256	4.34111e-17	upregulated
CLTC	2.33203e-21	0.277666	0.71	0.203	4.4488e-17	upregulated
NAE1	2.39299e-21	0.279132	0.675	0.185	4.56511e-17	upregulated
DHRS3	2.52621e-21	0.292886	0.325	0.004	4.81925e-17	upregulated
CD96	2.6403e-21	0.383279	0.906	0.388	5.0369e-17	upregulated
HIST1H2AH	2.71316e-21	0.30983	0.34	0.013	5.1759e-17	upregulated
MIR210HG	2.90731e-21	0.32066	0.314	0	5.54628e-17	upregulated
SRSF10	2.96462e-21	0.410744	0.882	0.419	5.65561e-17	upregulated
CD70	3.08197e-21	0.564586	0.521	0.123	5.87948e-17	upregulated
RPS7	3.09449e-21	-0.265504	1	1	5.90335e-17	downregulated
DCXR	3.17819e-21	0.349224	0.771	0.264	6.06302e-17	upregulated
PFKL	3.21165e-21	0.261792	0.636	0.163	6.12686e-17	upregulated
TNIP1	3.22125e-21	0.250179	0.651	0.181	6.14517e-17	upregulated
TNFSF8	3.36061e-21	0.413072	0.368	0.026	6.41104e-17	upregulated
AHSA1	3.37603e-21	0.364623	0.8	0.282	6.44046e-17	upregulated
LBR	3.3781e-21	0.427297	0.83	0.335	6.4444e-17	upregulated
LPGAT1	3.43716e-21	0.302196	0.747	0.233	6.55707e-17	upregulated
CHCHD1	3.69024e-21	0.389104	0.885	0.366	7.03988e-17	upregulated
TMEM126A	3.70897e-21	0.256296	0.689	0.194	7.07559e-17	upregulated
DBF4	3.77733e-21	0.30547	0.634	0.167	7.20602e-17	upregulated
SIVA1	3.82901e-21	0.472322	0.834	0.454	7.30459e-17	upregulated
USP14	4.24631e-21	0.300395	0.695	0.203	8.10068e-17	upregulated
CCND3	4.37119e-21	0.392952	0.957	0.652	8.33893e-17	upregulated
MRPS33	4.60599e-21	0.29694	0.778	0.251	8.78684e-17	upregulated
MRPL16	4.79406e-21	0.325701	0.81	0.278	9.14563e-17	upregulated
CUEDC2	5.17677e-21	0.294728	0.752	0.233	9.87573e-17	upregulated
GRAP2	5.33074e-21	0.288777	0.78	0.26	1.01694e-16	upregulated
COA6	7.27174e-21	0.266306	0.767	0.256	1.38723e-16	upregulated
FAM120A	7.50864e-21	0.277197	0.741	0.229	1.43242e-16	upregulated
RCBTB2	8.90395e-21	0.274001	0.364	0.026	1.69861e-16	upregulated
SUMO3	9.29766e-21	0.352281	0.882	0.357	1.77372e-16	upregulated
XRCC5	9.45913e-21	0.42334	0.967	0.63	1.80452e-16	upregulated
PRRC2A	9.96216e-21	0.250909	0.573	0.137	1.90048e-16	upregulated
CYC1	1.02229e-20	0.385412	0.865	0.344	1.95023e-16	upregulated
MRPL21	1.0305e-20	0.315897	0.793	0.26	1.96589e-16	upregulated
ATP5O	1.06595e-20	0.369775	0.978	0.709	2.03352e-16	upregulated
PSMD8	1.10601e-20	0.349115	0.969	0.7	2.10994e-16	upregulated
HIST1H2AL	1.15486e-20	0.364354	0.357	0.026	2.20313e-16	upregulated
LCP2	1.21415e-20	0.367972	0.915	0.401	2.31623e-16	upregulated
EEF1D	1.34489e-20	-0.314189	0.998	0.991	2.56565e-16	downregulated
CKAP2	1.35528e-20	0.29418	0.481	0.088	2.58547e-16	upregulated
DAXX	1.38044e-20	0.271522	0.773	0.242	2.63347e-16	upregulated
TRAP1	1.41164e-20	0.2502	0.429	0.057	2.69299e-16	upregulated
PDE6G	1.42906e-20	0.273977	0.379	0.035	2.72622e-16	upregulated
PUF60	1.46724e-20	0.36366	0.861	0.344	2.79905e-16	upregulated
BNIP3L	1.47484e-20	0.485705	0.61	0.203	2.81356e-16	upregulated
RALA	1.51208e-20	0.250454	0.745	0.225	2.88459e-16	upregulated
PTGES3	1.57291e-20	0.421602	0.948	0.643	3.00064e-16	upregulated
HSBP1	1.66112e-20	0.316497	0.85	0.295	3.16891e-16	upregulated
CD84	1.67629e-20	-0.736827	0.25	0.489	3.19786e-16	downregulated
CAP1	1.74338e-20	0.363077	0.987	0.762	3.32584e-16	upregulated
MRPL3	1.8833e-20	0.29149	0.673	0.194	3.59277e-16	upregulated
ABRACL	1.88951e-20	0.373543	0.957	0.604	3.60463e-16	upregulated
RAD21	1.94987e-20	0.547215	0.865	0.52	3.71977e-16	upregulated
PRDX4	1.98702e-20	0.260336	0.536	0.119	3.79063e-16	upregulated
RALB	2.04954e-20	0.257499	0.447	0.07	3.9099e-16	upregulated
NDUFA3	2.11567e-20	-0.549651	0.837	0.775	4.03607e-16	downregulated
COPE	2.12964e-20	0.335618	0.989	0.7	4.06271e-16	upregulated
SMARCA2	2.18082e-20	0.250187	0.662	0.185	4.16035e-16	upregulated
RPS27L	2.28823e-20	0.511641	0.98	0.718	4.36525e-16	upregulated
KLF2	2.35771e-20	-0.460896	0.891	0.965	4.4978e-16	downregulated
TFRC	2.7648e-20	0.318757	0.553	0.132	5.27441e-16	upregulated
PRDX6	3.27011e-20	0.387291	0.946	0.502	6.23839e-16	upregulated
GTF2A2	3.48357e-20	0.375226	0.904	0.423	6.64561e-16	upregulated
SMC4	3.92015e-20	0.557443	0.73	0.335	7.47848e-16	upregulated
EIF1AY	4.36957e-20	0.360087	0.856	0.366	8.33583e-16	upregulated
KIF20B	5.2028e-20	0.433336	0.621	0.203	9.92539e-16	upregulated
PPIH	5.33565e-20	0.269636	0.699	0.211	1.01788e-15	upregulated
LIF	5.46491e-20	0.34172	0.298	0	1.04254e-15	upregulated
GPATCH4	5.48777e-20	0.316608	0.545	0.137	1.0469e-15	upregulated
CHCHD10	5.82103e-20	0.363388	0.869	0.361	1.11048e-15	upregulated
NHP2	7.08335e-20	0.373285	0.884	0.388	1.35129e-15	upregulated
CYCS	8.5123e-20	0.444018	0.941	0.573	1.62389e-15	upregulated
GNPTAB	9.71279e-20	0.270073	0.765	0.256	1.85291e-15	upregulated
FDXR	1.02421e-19	0.277283	0.442	0.075	1.95388e-15	upregulated
PDIA6	1.05855e-19	0.38615	0.911	0.485	2.01939e-15	upregulated
PSMD2	1.12372e-19	0.327113	0.736	0.26	2.14372e-15	upregulated
MRPL4	1.1873e-19	0.299755	0.726	0.242	2.26501e-15	upregulated
TUFM	1.28137e-19	0.364754	0.878	0.374	2.44447e-15	upregulated
ALDOC	1.34733e-19	0.322532	0.433	0.07	2.5703e-15	upregulated
NSMCE1	1.40086e-19	0.310511	0.832	0.304	2.67243e-15	upregulated
SRGN	1.46968e-19	-0.466603	0.957	0.925	2.8037e-15	downregulated
TIMM13	1.47024e-19	0.364457	0.828	0.344	2.80478e-15	upregulated
NDUFAB1	1.51266e-19	0.388245	0.93	0.551	2.88571e-15	upregulated
HNRNPC	1.5567e-19	0.350407	0.978	0.811	2.96972e-15	upregulated
PTPN7	1.70984e-19	0.383916	0.865	0.361	3.26187e-15	upregulated
SEC61G	1.91745e-19	0.382515	0.987	0.744	3.65792e-15	upregulated
COPB2	2.05481e-19	0.258484	0.732	0.229	3.91996e-15	upregulated
IQGAP2	2.34942e-19	0.376932	0.878	0.401	4.48198e-15	upregulated
PSMC3	2.36504e-19	0.379169	0.823	0.339	4.51179e-15	upregulated
EIF5	2.50034e-19	0.338828	0.893	0.392	4.7699e-15	upregulated
HIST1H3B	3.02467e-19	0.275554	0.314	0.013	5.77016e-15	upregulated
ZNF706	3.37327e-19	0.356004	0.933	0.524	6.43518e-15	upregulated
RABL6	3.37358e-19	0.298078	0.758	0.264	6.43578e-15	upregulated
NDC80	3.93781e-19	0.259886	0.53	0.128	7.51216e-15	upregulated
MRPL36	4.04058e-19	0.272646	0.776	0.26	7.70822e-15	upregulated
EIF4G1	4.0892e-19	0.303523	0.612	0.181	7.80097e-15	upregulated
TAGLN2	4.38472e-19	0.361396	0.978	0.7	8.36472e-15	upregulated
S100A11	4.59491e-19	0.439113	0.996	0.938	8.76571e-15	upregulated
PDAP1	5.34927e-19	0.345818	0.9	0.405	1.02048e-14	upregulated
SMCO4	5.36938e-19	0.25164	0.392	0.053	1.02432e-14	upregulated
LAP3	5.45601e-19	0.256596	0.741	0.251	1.04084e-14	upregulated
EIF2S1	5.65517e-19	0.267257	0.726	0.233	1.07884e-14	upregulated
PRDX5	5.73523e-19	0.348179	0.963	0.573	1.09411e-14	upregulated
PPP1CA	6.1247e-19	0.305528	0.987	0.841	1.16841e-14	upregulated
SNRPE	6.22526e-19	0.371783	0.95	0.564	1.18759e-14	upregulated
HIST1H2BH	6.38589e-19	0.281364	0.336	0.026	1.21824e-14	upregulated
TXNL4A	6.81745e-19	0.335607	0.911	0.441	1.30057e-14	upregulated
GADD45GIP1	6.96e-19	0.388994	0.922	0.467	1.32776e-14	upregulated
PIH1D1	7.01096e-19	0.296377	0.808	0.3	1.33748e-14	upregulated
SYNE1	7.33924e-19	-0.715256	0.388	0.559	1.40011e-14	downregulated
NDUFS8	8.79573e-19	0.33861	0.924	0.436	1.67796e-14	upregulated
HSPA4	8.95488e-19	0.251271	0.63	0.185	1.70832e-14	upregulated
SEC61B	9.10445e-19	0.365876	0.985	0.797	1.73686e-14	upregulated
BTF3	9.23062e-19	0.280655	0.998	0.996	1.76093e-14	upregulated
RTRAF	1.06383e-18	0.343431	0.965	0.674	2.02946e-14	upregulated
LMNA	1.07499e-18	0.339079	0.29	0.004	2.05076e-14	upregulated
PPP2CA	1.26552e-18	0.284148	0.765	0.26	2.41423e-14	upregulated
DAZAP1	1.34318e-18	0.256355	0.713	0.229	2.56238e-14	upregulated
MATK	1.42218e-18	-0.600587	0.207	0.449	2.71309e-14	downregulated
RAD23A	1.42778e-18	0.36215	0.896	0.467	2.72377e-14	upregulated
SKA2	1.4701e-18	0.329865	0.741	0.269	2.80451e-14	upregulated
RHOA	1.61559e-18	0.295821	0.983	0.797	3.08207e-14	upregulated
CAB39	1.63671e-18	0.263398	0.736	0.242	3.12234e-14	upregulated
POMP	1.76899e-18	0.353747	0.972	0.718	3.3747e-14	upregulated
MRPL22	2.10567e-18	0.279391	0.8	0.286	4.01699e-14	upregulated
EEF1E1	2.16324e-18	0.261578	0.671	0.216	4.1268e-14	upregulated
MBD2	2.28852e-18	0.327865	0.81	0.326	4.36581e-14	upregulated
NEK2	2.34165e-18	0.272979	0.301	0.013	4.46717e-14	upregulated
CD37	2.48873e-18	-0.505055	0.928	0.819	4.74774e-14	downregulated
LMAN1	2.79788e-18	0.327368	0.874	0.383	5.33752e-14	upregulated
LTA	3.6531e-18	0.299266	0.357	0.04	6.96903e-14	upregulated
CDKN1A	3.74739e-18	0.292161	0.292	0.009	7.14891e-14	upregulated
NUTF2	3.8681e-18	0.283687	0.765	0.264	7.37918e-14	upregulated
OSBPL8	4.08937e-18	0.257183	0.813	0.304	7.80128e-14	upregulated
ANP32A	4.95036e-18	0.351235	0.932	0.599	9.4438e-14	upregulated
NDUFS7	4.99295e-18	0.321925	0.924	0.405	9.52506e-14	upregulated
TIMM10	5.04235e-18	0.263213	0.734	0.247	9.61928e-14	upregulated
MRPL14	5.54449e-18	0.304407	0.852	0.33	1.05772e-13	upregulated
MIF	5.66623e-18	0.453389	0.957	0.705	1.08095e-13	upregulated
KHDRBS1	5.74997e-18	0.346558	0.902	0.467	1.09692e-13	upregulated
EVL	5.92661e-18	0.362457	0.994	0.811	1.13062e-13	upregulated
PSMB4	6.20993e-18	0.319792	0.939	0.52	1.18467e-13	upregulated
TECR	6.44647e-18	0.282717	0.891	0.37	1.22979e-13	upregulated
SFPQ	6.66577e-18	0.416656	0.876	0.476	1.27163e-13	upregulated
ANXA2	6.7295e-18	0.412069	0.961	0.7	1.28379e-13	upregulated
N4BP2L2	7.10514e-18	-0.568114	0.832	0.753	1.35545e-13	downregulated
GNG5	7.84388e-18	0.330023	0.961	0.709	1.49638e-13	upregulated
MDM2	7.93967e-18	0.295834	0.59	0.172	1.51465e-13	upregulated
NDUFB3	8.09798e-18	0.349113	0.957	0.581	1.54485e-13	upregulated
HNRNPR	8.83902e-18	0.366989	0.921	0.52	1.68622e-13	upregulated
ARL6IP4	9.68183e-18	0.338956	0.978	0.687	1.847e-13	upregulated
PSMG2	1.12903e-17	0.305894	0.865	0.357	2.15385e-13	upregulated
SEPT6	1.27888e-17	0.353401	0.945	0.537	2.43972e-13	upregulated
TPM3	1.30087e-17	0.336265	0.987	0.793	2.48168e-13	upregulated
EIF3A	1.47287e-17	0.377247	0.911	0.511	2.8098e-13	upregulated
NONO	1.50248e-17	0.324587	0.872	0.396	2.86628e-13	upregulated
FAM129A	1.92208e-17	0.289944	0.793	0.308	3.66675e-13	upregulated
GNAS	2.01752e-17	0.282288	0.987	0.859	3.84881e-13	upregulated
FABP5	2.03403e-17	0.530349	0.758	0.361	3.88032e-13	upregulated
LSM3	2.21171e-17	0.341036	0.882	0.502	4.21929e-13	upregulated
CLPP	2.35221e-17	0.304262	0.895	0.383	4.4873e-13	upregulated
BNIP3	2.43058e-17	0.538269	0.521	0.176	4.63682e-13	upregulated
FCRL3	2.5197e-17	-0.251591	0	0.128	4.80684e-13	downregulated
GSTO1	2.87818e-17	0.372036	0.917	0.507	5.4907e-13	upregulated
TOP1	3.08585e-17	0.301399	0.891	0.405	5.88688e-13	upregulated
RHOH	3.41894e-17	0.261087	0.826	0.317	6.5223e-13	upregulated
SAMD3	3.55377e-17	-0.513428	0.701	0.74	6.77952e-13	downregulated
TMEM167A	3.57653e-17	0.316517	0.819	0.326	6.82295e-13	upregulated
PPDPF	3.70212e-17	-0.443748	0.909	0.877	7.06254e-13	downregulated
SUZ12	3.71554e-17	0.284596	0.773	0.3	7.08813e-13	upregulated
IFITM1	4.07584e-17	-0.526662	0.891	0.855	7.77547e-13	downregulated
GATA3	4.46702e-17	0.289565	0.765	0.295	8.52174e-13	upregulated
REEP5	5.21843e-17	0.340775	0.95	0.577	9.95519e-13	upregulated
NDUFS2	5.57971e-17	0.268762	0.837	0.313	1.06444e-12	upregulated
KRR1	5.79287e-17	0.268318	0.793	0.291	1.10511e-12	upregulated
COX17	5.85479e-17	0.326316	0.86	0.392	1.11692e-12	upregulated
CMTM6	5.9944e-17	0.271495	0.789	0.295	1.14355e-12	upregulated
KIAA1551	6.33997e-17	-0.70495	0.736	0.709	1.20948e-12	downregulated
MYC	6.53737e-17	0.30181	0.51	0.141	1.24713e-12	upregulated
PCBP1	6.99814e-17	0.316535	0.991	0.727	1.33503e-12	upregulated
OLA1	7.2815e-17	0.251524	0.723	0.247	1.38909e-12	upregulated
TIMM8B	7.3071e-17	0.274406	0.874	0.374	1.39398e-12	upregulated
FAM96B	8.06705e-17	0.322191	0.956	0.577	1.53895e-12	upregulated
VPS29	8.16146e-17	0.330265	0.871	0.405	1.55696e-12	upregulated
SIT1	9.039e-17	0.35061	0.946	0.546	1.72437e-12	upregulated
MRPL34	9.64553e-17	0.268845	0.885	0.357	1.84008e-12	upregulated
SMC1A	9.69352e-17	0.271665	0.652	0.22	1.84923e-12	upregulated
PSMC5	1.24495e-16	0.337779	0.932	0.533	2.37499e-12	upregulated
CHMP5	1.25865e-16	0.294136	0.806	0.326	2.40113e-12	upregulated
CLIC1	1.70111e-16	0.283695	0.998	0.952	3.24521e-12	upregulated
LYST	1.73796e-16	-0.761962	0.368	0.529	3.3155e-12	downregulated
FXYD5	1.79642e-16	0.370223	0.989	0.784	3.42704e-12	upregulated
FIBP	1.85398e-16	0.264634	0.815	0.3	3.53684e-12	upregulated
RHEB	1.86897e-16	0.289098	0.725	0.273	3.56543e-12	upregulated
TXN2	1.95183e-16	0.305638	0.852	0.348	3.72351e-12	upregulated
NEDD8	2.1092e-16	0.290424	0.976	0.789	4.02371e-12	upregulated
NDUFAF3	2.23161e-16	0.282015	0.841	0.344	4.25725e-12	upregulated
ATP6V0B	2.28435e-16	0.31943	0.921	0.52	4.35785e-12	upregulated
ZNF292	2.32331e-16	0.2534	0.725	0.269	4.43217e-12	upregulated
SNRPC	2.39377e-16	0.296208	0.885	0.388	4.5666e-12	upregulated
MRPL57	2.40371e-16	0.271788	0.922	0.48	4.58556e-12	upregulated
CCDC167	2.66553e-16	0.29531	0.863	0.392	5.08503e-12	upregulated
PRKDC	4.2217e-16	0.331968	0.811	0.401	8.05374e-12	upregulated
SSR3	4.34816e-16	0.324155	0.926	0.48	8.29499e-12	upregulated
METTL26	4.41548e-16	0.276741	0.854	0.348	8.42342e-12	upregulated
UQCC2	4.43455e-16	0.297195	0.765	0.295	8.45979e-12	upregulated
TMEM14B	4.58352e-16	0.34466	0.885	0.449	8.74397e-12	upregulated
PSMD4	4.71902e-16	0.327016	0.904	0.441	9.00248e-12	upregulated
UBE2I	4.77573e-16	0.284562	0.945	0.599	9.11065e-12	upregulated
SRSF9	4.88707e-16	0.293684	0.963	0.678	9.32306e-12	upregulated
PSMA5	5.16969e-16	0.320909	0.967	0.674	9.86222e-12	upregulated
ATP5J	5.26391e-16	0.285791	0.974	0.806	1.0042e-11	upregulated
REG4	6.06713e-16	0.285741	0.242	0	1.15743e-11	upregulated
GTF3C6	6.28775e-16	0.337936	0.909	0.507	1.19951e-11	upregulated
MRPS7	6.35992e-16	0.256413	0.776	0.313	1.21328e-11	upregulated
CIRBP	6.3641e-16	-0.521397	0.902	0.784	1.21408e-11	downregulated
GPR171	7.03194e-16	0.319011	0.83	0.357	1.34148e-11	upregulated
PPP1CC	7.05035e-16	0.284068	0.8	0.33	1.345e-11	upregulated
TOMM22	7.5041e-16	0.258903	0.828	0.33	1.43156e-11	upregulated
PSIP1	7.74183e-16	0.318852	0.85	0.436	1.47691e-11	upregulated
SNF8	8.48144e-16	0.319734	0.867	0.396	1.61801e-11	upregulated
NDUFA4	8.61565e-16	0.278481	0.994	0.877	1.64361e-11	upregulated
EIF3I	1.01971e-15	0.326111	0.933	0.529	1.9453e-11	upregulated
SON	1.02003e-15	-0.417963	0.924	0.859	1.94591e-11	downregulated
NDUFS3	1.07053e-15	0.262923	0.811	0.313	2.04225e-11	upregulated
MPG	1.07178e-15	0.256246	0.83	0.33	2.04464e-11	upregulated
SAT1	1.08046e-15	-0.484624	0.843	0.767	2.06119e-11	downregulated
PSMD13	1.09933e-15	0.296272	0.867	0.388	2.0972e-11	upregulated
RIPOR2	1.18139e-15	-0.528866	0.834	0.824	2.25375e-11	downregulated
MRPL41	1.35847e-15	0.304222	0.937	0.564	2.59156e-11	upregulated
PFDN2	1.3967e-15	0.311257	0.909	0.471	2.66449e-11	upregulated
NIFK	1.42556e-15	0.264697	0.743	0.286	2.71954e-11	upregulated
ITGB7	1.49666e-15	0.302781	0.911	0.427	2.85517e-11	upregulated
MRPS34	1.5003e-15	0.344505	0.919	0.489	2.86213e-11	upregulated
APOBEC3G	1.67923e-15	-0.501277	0.915	0.793	3.20346e-11	downregulated
OSTF1	2.14978e-15	0.318628	0.924	0.546	4.10114e-11	upregulated
HLA-DRB5	2.21463e-15	-0.446468	0.076	0.295	4.22484e-11	downregulated
PSMB3	2.30327e-15	0.288374	0.98	0.767	4.39394e-11	upregulated
S100A10	2.55652e-15	0.314831	0.996	0.96	4.87707e-11	upregulated
ADA	2.57746e-15	0.254053	0.789	0.295	4.91701e-11	upregulated
UQCRC2	2.87433e-15	0.279963	0.824	0.344	5.48335e-11	upregulated
TRIM28	3.08628e-15	0.25507	0.721	0.269	5.88769e-11	upregulated
RBBP7	3.15503e-15	0.25633	0.773	0.295	6.01886e-11	upregulated
SRSF11	3.4687e-15	0.310793	0.904	0.476	6.61723e-11	upregulated
ADRM1	3.62219e-15	0.285533	0.845	0.396	6.91006e-11	upregulated
ENSA	3.62555e-15	0.312608	0.904	0.454	6.91646e-11	upregulated
PTP4A2	4.16152e-15	0.274545	0.982	0.78	7.93893e-11	upregulated
IDH2	4.72129e-15	0.328406	0.911	0.493	9.00681e-11	upregulated
TNF	5.38944e-15	0.268505	0.264	0.018	1.02814e-10	upregulated
CALR	6.82731e-15	0.397003	0.945	0.722	1.30245e-10	upregulated
MRPS12	6.83155e-15	0.264484	0.835	0.361	1.30325e-10	upregulated
VMP1	7.10343e-15	0.260272	0.841	0.37	1.35512e-10	upregulated
ATP5G1	7.30424e-15	0.329602	0.863	0.436	1.39343e-10	upregulated
DBI	7.60418e-15	0.279071	0.98	0.837	1.45065e-10	upregulated
NOP53	7.9719e-15	-0.42863	0.959	0.868	1.5208e-10	downregulated
ADH5	8.49027e-15	0.277315	0.871	0.388	1.61969e-10	upregulated
CSNK2B	9.43409e-15	0.277584	0.952	0.595	1.79974e-10	upregulated
EWSR1	9.49811e-15	0.265161	0.839	0.357	1.81195e-10	upregulated
ARF1	9.95455e-15	0.298362	0.957	0.612	1.89903e-10	upregulated
RGS19	1.06709e-14	0.255091	0.891	0.396	2.03568e-10	upregulated
SSBP1	1.16889e-14	0.294803	0.941	0.639	2.22989e-10	upregulated
PSMA1	1.24012e-14	0.297657	0.954	0.586	2.36578e-10	upregulated
NDUFB11	1.34575e-14	0.306422	0.994	0.714	2.56729e-10	upregulated
MAZ	1.38119e-14	0.311081	0.896	0.445	2.63489e-10	upregulated
MAP2K2	1.55408e-14	0.316281	0.972	0.599	2.96472e-10	upregulated
HMGN1	1.78505e-14	0.274263	0.98	0.762	3.40535e-10	upregulated
PSMC1	1.82184e-14	0.252179	0.821	0.344	3.47553e-10	upregulated
RAC1	2.19859e-14	0.278006	0.946	0.639	4.19424e-10	upregulated
CANX	2.28394e-14	0.291473	0.834	0.401	4.35708e-10	upregulated
MESD	2.55132e-14	0.250333	0.83	0.352	4.86715e-10	upregulated
CEBPD	2.83025e-14	-0.372571	0.02	0.163	5.39928e-10	downregulated
CDC25B	2.94095e-14	0.334135	0.834	0.445	5.61044e-10	upregulated
LAG3	3.01376e-14	-0.587679	0.416	0.564	5.74935e-10	downregulated
NDUFS6	3.19292e-14	0.283565	0.961	0.674	6.09114e-10	upregulated
RPS4Y1	3.31287e-14	-0.333647	0.976	0.96	6.31996e-10	downregulated
SUPT16H	3.74292e-14	0.252223	0.789	0.348	7.14038e-10	upregulated
CDC37	4.398e-14	0.298184	0.913	0.502	8.39006e-10	upregulated
RBM39	4.46606e-14	-0.392257	0.943	0.859	8.5199e-10	downregulated
DNAJA1	4.46875e-14	0.318606	0.904	0.537	8.52504e-10	upregulated
RNF213	5.11149e-14	-0.436675	0.913	0.881	9.75119e-10	downregulated
PRPF40A	5.37107e-14	0.283282	0.911	0.458	1.02464e-09	upregulated
ANAPC11	6.96561e-14	0.29461	0.861	0.458	1.32883e-09	upregulated
CDKN2A	6.97126e-14	0.327274	0.627	0.256	1.32991e-09	upregulated
MT1E	7.80503e-14	0.255253	0.697	0.269	1.48897e-09	upregulated
TMA7	7.92915e-14	-0.278774	0.996	0.987	1.51264e-09	downregulated
FKBP8	8.46014e-14	0.312297	0.941	0.502	1.61394e-09	upregulated
RPL7	9.96471e-14	0.282144	0.996	0.987	1.90097e-09	upregulated
GHITM	1.16221e-13	0.275216	0.917	0.511	2.21715e-09	upregulated
LCP1	1.2926e-13	0.288537	0.991	0.815	2.46589e-09	upregulated
GLRX5	1.35011e-13	0.278582	0.826	0.392	2.57561e-09	upregulated
CCR7	1.37662e-13	0.34717	0.235	0.013	2.62619e-09	upregulated
GDI2	2.32678e-13	0.267801	0.852	0.414	4.4388e-09	upregulated
MRPS6	2.37263e-13	0.257625	0.889	0.449	4.52627e-09	upregulated
CXCR4	2.55146e-13	0.300588	0.909	0.48	4.86742e-09	upregulated
TGFBR3	2.83584e-13	-0.437816	0.067	0.238	5.40993e-09	downregulated
HSPB11	2.98353e-13	0.252859	0.856	0.419	5.69168e-09	upregulated
IFI44L	3.12387e-13	0.35701	0.401	0.11	5.95942e-09	upregulated
CFLAR	3.19893e-13	-0.529573	0.754	0.687	6.10261e-09	downregulated
SDF2L1	3.27022e-13	0.277427	0.863	0.419	6.23861e-09	upregulated
CD99	3.34489e-13	-0.369234	0.957	0.943	6.38105e-09	downregulated
BUB3	3.50192e-13	0.304363	0.906	0.537	6.68061e-09	upregulated
MRPL11	3.59958e-13	0.265437	0.832	0.374	6.86692e-09	upregulated
PPM1G	3.70981e-13	0.298173	0.93	0.551	7.0772e-09	upregulated
PHB	3.87012e-13	0.257706	0.884	0.441	7.38303e-09	upregulated
HNRNPA3	4.60941e-13	0.287498	0.97	0.797	8.79338e-09	upregulated
RAP1B	4.69747e-13	-0.351472	0.959	0.881	8.96137e-09	downregulated
RNPS1	5.67433e-13	0.268036	0.845	0.401	1.08249e-08	upregulated
ARPC4	6.39263e-13	0.264156	0.948	0.634	1.21952e-08	upregulated
PRDM1	7.51036e-13	-0.724021	0.434	0.533	1.43275e-08	downregulated
SET	7.55404e-13	0.291566	0.974	0.85	1.44108e-08	upregulated
FCMR	7.63628e-13	-0.473338	0.133	0.322	1.45677e-08	downregulated
KLRB1	8.55286e-13	-0.755718	0.028	0.167	1.63163e-08	downregulated
YPEL3	9.32577e-13	-0.55552	0.628	0.652	1.77908e-08	downregulated
MPC2	9.38369e-13	0.259264	0.83	0.37	1.79013e-08	upregulated
GZMB	1.03078e-12	-0.41666	0.769	0.855	1.96641e-08	downregulated
NOP10	1.03859e-12	0.258359	0.967	0.749	1.98131e-08	upregulated
BIN2	1.046e-12	-0.44663	0.85	0.749	1.99546e-08	downregulated
MDH2	1.15992e-12	0.273545	0.9	0.52	2.21277e-08	upregulated
EIF3L	1.24504e-12	0.262006	0.937	0.511	2.37516e-08	upregulated
NDUFA2	1.60626e-12	0.25114	0.969	0.59	3.06427e-08	upregulated
SNRPD3	1.67672e-12	0.272709	0.943	0.634	3.19868e-08	upregulated
LRRFIP1	2.06343e-12	0.312705	0.967	0.696	3.9364e-08	upregulated
LAMTOR2	2.1062e-12	0.253541	0.896	0.441	4.018e-08	upregulated
CCT4	2.2805e-12	0.283282	0.85	0.445	4.35051e-08	upregulated
IGFBP2	4.57145e-12	0.443239	0.185	0	8.72096e-08	upregulated
DYNLL1	5.64128e-12	0.274039	0.97	0.762	1.07619e-07	upregulated
SF1	5.72438e-12	-0.443468	0.893	0.762	1.09204e-07	downregulated
SRI	6.22262e-12	0.269243	0.919	0.542	1.18709e-07	upregulated
LAMTOR5	6.49306e-12	0.252705	0.952	0.626	1.23868e-07	upregulated
SRSF7	6.93559e-12	0.282138	0.959	0.758	1.3231e-07	upregulated
ITGB2	7.5396e-12	-0.395771	0.97	0.863	1.43833e-07	downregulated
LBH	8.53966e-12	-0.627336	0.558	0.59	1.62911e-07	downregulated
PARP1	1.04115e-11	0.258065	0.878	0.467	1.9862e-07	upregulated
AKAP13	1.06931e-11	-0.495908	0.749	0.674	2.03993e-07	downregulated
RBM8A	1.23921e-11	0.265326	0.941	0.608	2.36404e-07	upregulated
MYDGF	1.56146e-11	0.257009	0.876	0.458	2.9788e-07	upregulated
ITM2B	1.67062e-11	-0.324862	0.974	0.921	3.18704e-07	downregulated
ISG20	1.84983e-11	-0.341395	0.926	0.921	3.52892e-07	downregulated
PATL2	2.33426e-11	-0.415491	0.092	0.256	4.45307e-07	downregulated
ZBP1	2.98041e-11	-0.367841	0.055	0.203	5.68573e-07	downregulated
SRM	3.20212e-11	0.320555	0.758	0.396	6.10867e-07	upregulated
CREBRF	5.12564e-11	-0.572931	0.244	0.401	9.77819e-07	downregulated
UQCRFS1	5.26457e-11	0.250616	0.921	0.524	1.00432e-06	upregulated
RPS19BP1	5.90218e-11	0.281822	0.917	0.524	1.12596e-06	upregulated
PSME2	1.03317e-10	0.252833	0.993	0.881	1.97097e-06	upregulated
XBP1	1.03805e-10	0.280097	0.915	0.564	1.98028e-06	upregulated
HLA-DQB1	1.04533e-10	0.476765	0.558	0.251	1.99417e-06	upregulated
STK4	1.12021e-10	-0.331201	0.954	0.828	2.13703e-06	downregulated
CYTOR	1.49304e-10	-0.596333	0.784	0.656	2.84827e-06	downregulated
MXD4	2.27404e-10	-0.558756	0.274	0.414	4.33818e-06	downregulated
BTN3A2	3.15202e-10	-0.552565	0.717	0.639	6.01312e-06	downregulated
HSPA5	3.8515e-10	0.295248	0.856	0.524	7.34751e-06	upregulated
TCF25	4.41713e-10	-0.424638	0.802	0.696	8.42655e-06	downregulated
PSME1	5.85494e-10	-0.259022	0.994	0.965	1.11695e-05	downregulated
HLA-DRB1	6.79174e-10	-0.268577	0.706	0.789	1.29566e-05	downregulated
IL13	7.90242e-10	0.489158	0.15	0	1.50754e-05	upregulated
AAK1	9.48927e-10	-0.485844	0.734	0.652	1.81027e-05	downregulated
UQCR11	1.11827e-09	-0.259602	0.993	0.907	2.13333e-05	downregulated
CARD16	1.22708e-09	-0.478787	0.797	0.67	2.34091e-05	downregulated
PNISR	1.49584e-09	-0.375098	0.911	0.819	2.85361e-05	downregulated
SLC35D2	5.97933e-09	-0.343884	0.116	0.26	0.000114068	downregulated
AHNAK	9.69951e-09	-0.390651	0.81	0.736	0.000185038	downregulated
GIMAP4	1.04897e-08	-0.351808	0.932	0.899	0.000200112	downregulated
SEPT7	1.16316e-08	-0.275094	0.98	0.912	0.000221895	downregulated
RSRP1	1.75949e-08	-0.425899	0.774	0.661	0.000335658	downregulated
EVI2B	1.92669e-08	-0.53638	0.555	0.559	0.000367555	downregulated
SLAMF7	2.46612e-08	-0.484606	0.299	0.41	0.000470462	downregulated
PET100	2.4754e-08	-0.453736	0.813	0.648	0.000472233	downregulated
ATP5I	2.72312e-08	-0.305003	0.943	0.802	0.000519489	downregulated
KLF6	3.68418e-08	-0.499041	0.83	0.718	0.000702831	downregulated
ATM	4.129e-08	-0.552253	0.627	0.573	0.000787689	downregulated
ZBTB38	5.81674e-08	-0.559742	0.307	0.405	0.00110966	downregulated
C5orf56	1.31296e-07	-0.563165	0.534	0.52	0.00250474	downregulated
TMBIM4	1.43926e-07	-0.31872	0.874	0.731	0.00274567	downregulated
SLAMF6	1.63768e-07	-0.52611	0.214	0.33	0.0031242	downregulated
JUNB	1.96969e-07	-0.390604	0.848	0.749	0.00375758	downregulated
STAT1	3.04725e-07	-0.296909	0.784	0.731	0.00581324	downregulated
PRR5	7.57143e-07	-0.515128	0.421	0.458	0.014444	downregulated
SPON2	7.68531e-07	-0.56399	0.111	0.225	0.0146613	downregulated
HLA-DPA1	9.09916e-07	-0.306908	0.745	0.709	0.0173585	downregulated
APMAP	9.74024e-07	-0.495699	0.471	0.476	0.0185815	downregulated
SUN2	1.06537e-06	-0.375816	0.765	0.648	0.0203241	downregulated
TSPAN2	1.08515e-06	-0.3182	0.085	0.194	0.0207015	downregulated
HIST1H1D	1.20259e-06	0.287677	0.739	0.471	0.0229418	upregulated
GBP5	1.25723e-06	-0.381769	0.895	0.749	0.0239842	downregulated
TBX21	1.29179e-06	-0.428357	0.209	0.317	0.0246434	downregulated
KRTCAP2	1.62665e-06	-0.378182	0.821	0.665	0.0310316	downregulated
C4orf3	1.83996e-06	0.307737	0.956	0.705	0.0351009	upregulated
COPS9	2.0209e-06	-0.257021	0.906	0.753	0.0385527	downregulated
MT2A	2.17235e-06	-0.522598	0.895	0.775	0.041442	downregulated
GCC2	3.97399e-06	-0.426348	0.675	0.586	0.0758117	downregulated
IL10RA	5.48795e-06	-0.415538	0.745	0.634	0.104694	downregulated
METRNL	7.4843e-06	-0.253179	0.055	0.145	0.142778	downregulated
GBP4	1.05789e-05	-0.509814	0.682	0.568	0.201813	downregulated
ZNF831	1.33534e-05	-0.28467	0.078	0.172	0.254744	downregulated
CLEC2B	1.40688e-05	-0.321065	0.904	0.753	0.26839	downregulated
TIMD4	1.67182e-05	-0.427264	0.259	0.348	0.318932	downregulated
MYO1F	1.73058e-05	-0.374374	0.75	0.59	0.330142	downregulated
P2RY8	2.06226e-05	-0.479906	0.503	0.476	0.393417	downregulated
TNFAIP3	2.31058e-05	-0.51245	0.314	0.379	0.44079	downregulated
ARL6IP1	2.52508e-05	0.317317	0.878	0.577	0.481709	upregulated
SIGIRR	3.46316e-05	-0.412525	0.645	0.533	0.660668	downregulated
IRF1	4.11415e-05	-0.34838	0.926	0.731	0.784855	downregulated
MAT2B	4.15455e-05	-0.405229	0.608	0.52	0.792564	downregulated
TCF7	4.51567e-05	-0.363689	0.139	0.233	0.861455	downregulated
CNOT6L	6.39422e-05	-0.432475	0.499	0.476	1	downregulated
PLEKHA1	6.53783e-05	-0.304956	0.135	0.225	1	downregulated
TAPBP	7.0952e-05	-0.256727	0.898	0.714	1	downregulated
CHST12	7.89825e-05	-0.391946	0.632	0.546	1	downregulated
CD44	9.27813e-05	-0.359873	0.641	0.564	1	downregulated
PAXX	0.000190661	-0.378727	0.837	0.639	1	downregulated
STK38	0.00026377	-0.443877	0.484	0.454	1	downregulated
JAK1	0.00028483	-0.25477	0.924	0.753	1	downregulated
TMX4	0.000298278	-0.389412	0.462	0.436	1	downregulated
IFNG	0.00031792	0.320258	0.279	0.132	1	upregulated
CHI3L2	0.000325591	-0.31234	0.098	0.176	1	downregulated
DDX6	0.000329937	-0.370338	0.686	0.551	1	downregulated
FAM173A	0.000422751	-0.34928	0.187	0.256	1	downregulated
HLA-DRA	0.000461862	0.2641	0.762	0.542	1	upregulated
TRIM22	0.000464581	-0.327674	0.521	0.524	1	downregulated
FAM107B	0.000466176	-0.273164	0.887	0.727	1	downregulated
ARAP2	0.000570301	-0.416028	0.323	0.357	1	downregulated
PIK3IP1	0.000659223	-0.335055	0.168	0.238	1	downregulated
APBB1IP	0.000659404	-0.321583	0.799	0.599	1	downregulated
CTSS	0.000941005	-0.327121	0.695	0.564	1	downregulated
SKAP1	0.00104623	-0.281689	0.834	0.639	1	downregulated
DDX3X	0.00151977	-0.272687	0.701	0.559	1	downregulated
KLF3	0.00181658	-0.280358	0.165	0.229	1	downregulated
BTN3A1	0.00189097	-0.353289	0.257	0.3	1	downregulated
PRMT2	0.00229321	-0.334811	0.854	0.639	1	downregulated
CASP8	0.00229342	-0.377839	0.612	0.498	1	downregulated
LINC01871	0.00302317	-0.342658	0.826	0.687	1	downregulated
TTC38	0.00310194	-0.348035	0.129	0.189	1	downregulated
DDX24	0.00315085	-0.264154	0.876	0.683	1	downregulated
DGKZ	0.00318755	-0.368819	0.621	0.502	1	downregulated
RAP1GAP2	0.00339377	-0.261826	0.12	0.181	1	downregulated
IDS	0.00351162	-0.411062	0.588	0.471	1	downregulated
MBP	0.0038866	-0.42239	0.767	0.568	1	downregulated
CDC42SE2	0.00445642	-0.297321	0.867	0.665	1	downregulated
LINC02084	0.00481952	-0.330226	0.148	0.203	1	downregulated
STK17A	0.00528695	-0.294039	0.815	0.612	1	downregulated
CXCR6	0.00529633	-0.33219	0.198	0.256	1	downregulated
GPR183	0.00556494	-0.274942	0.107	0.163	1	downregulated
EOMES	0.00630425	-0.319686	0.185	0.238	1	downregulated
CYTH1	0.00709719	-0.364218	0.619	0.489	1	downregulated
ARGLU1	0.00720857	-0.25182	0.824	0.634	1	downregulated
TNFRSF14	0.00794651	-0.375182	0.689	0.52	1	downregulated
PARP8	0.00807297	-0.430079	0.364	0.352	1	downregulated
SH3BGRL	0.00846833	-0.257446	0.856	0.612	1	downregulated
USP28	0.0100196	-0.370403	0.301	0.313	1	downregulated
OPTN	0.0103128	-0.270853	0.85	0.634	1	downregulated
EFHD2	0.0105245	-0.381153	0.83	0.59	1	downregulated
TRGC1	0.0113944	-0.337267	0.083	0.137	1	downregulated
SMCHD1	0.0120621	-0.274289	0.786	0.599	1	downregulated
MDM4	0.0127045	-0.3625	0.471	0.414	1	downregulated
PCSK7	0.0157673	-0.342634	0.664	0.52	1	downregulated
SYNE2	0.0161149	-0.283727	0.738	0.608	1	downregulated
SNHG9	0.0207998	-0.304102	0.196	0.229	1	downregulated
CHD3	0.021803	-0.373851	0.494	0.419	1	downregulated
SEC62	0.0261162	-0.335213	0.773	0.555	1	downregulated
TRANK1	0.0269425	-0.268836	0.207	0.238	1	downregulated
APOL6	0.0292013	-0.329478	0.651	0.493	1	downregulated
ATG2A	0.0293132	-0.271236	0.163	0.198	1	downregulated
DIP2A	0.0328991	-0.340728	0.357	0.339	1	downregulated
GAB3	0.0368701	-0.433059	0.268	0.273	1	downregulated
BCL9L	0.0391995	-0.34438	0.381	0.348	1	downregulated
EPB41	0.0442371	-0.321689	0.505	0.419	1	downregulated
C1orf56	0.0498218	-0.405075	0.545	0.458	1	downregulated
The data of patient-3 sample after 28 days treatment is excluded due to an unreliable low CAR+ cell number.
