# Supplementary material for: CRISPR/Cas-mediated non-viral genome specific targeted CAR T cells achieve high safety and efficacy in relapsed/refractory B-cell non-Hodgkin lymphoma
Source: Research Square preprint supplement (doi:10.21203/rs.3.rs-373651/v1), 2021-04-03
Supplement: Supplementary file 3 [file 5df101c54ac9d200deb1c42a.xlsx]

## Sheet: sheet1
Table S6: Differentially expressed genes between two CD8+ T cell clusters in three infusion products
*Calculated by two-sided Wilcoxon rank sum test in Seurat R package
**P-value corrected using Bonferroni method in Seurat R package
Gene	p_val*	avg_logFC	pct.1 (C1)	pct.2 (C2)	p_val_adj**	up_down
IFITM2	0	1.16748	0.979	0.743	0	upregulated
LRRN3	0	0.941431	0.808	0.214	0	upregulated
TIMP1	0	0.854244	0.733	0.257	0	upregulated
NOSIP	0	0.827715	0.952	0.755	0	upregulated
CAPG	0	0.82051	0.794	0.366	0	upregulated
SPOCK2	0	0.790293	0.857	0.313	0	upregulated
SATB1	0	0.771006	0.898	0.609	0	upregulated
IFITM1	0	0.712397	0.842	0.509	0	upregulated
CD7	0	0.656202	0.948	0.708	0	upregulated
CD27	0	0.636244	0.831	0.31	0	upregulated
RFLNB	0	0.605363	0.927	0.746	0	upregulated
TPT1	0	0.390172	1	0.999	0	upregulated
PRSS23	0	-0.264278	0.022	0.292	0	downregulated
AC017002.3	0	-0.286334	0.055	0.36	0	downregulated
TNFRSF9	0	-0.348587	0.012	0.326	0	downregulated
PYHIN1	0	-0.38317	0.11	0.505	0	downregulated
RCAN2	0	-0.407969	0.01	0.428	0	downregulated
HLA-DMB	0	-0.43842	0.23	0.644	0	downregulated
MSC	0	-0.459608	0.054	0.525	0	downregulated
F2R	0	-0.489292	0.141	0.633	0	downregulated
XCL2	0	-0.531348	0.066	0.491	0	downregulated
ZEB2	0	-0.551003	0.044	0.553	0	downregulated
SRGN	0	-0.586781	0.94	0.99	0	downregulated
TIGIT	0	-0.627316	0.05	0.582	0	downregulated
RNF213	0	-0.638926	0.88	0.975	0	downregulated
FCGR3A	0	-0.642049	0.012	0.282	0	downregulated
RGS1	0	-0.710516	0.137	0.612	0	downregulated
ITGB1	0	-0.712336	0.307	0.779	0	downregulated
PTMS	0	-0.744541	0.422	0.841	0	downregulated
LINC01943	0	-0.774838	0.222	0.7	0	downregulated
LMNA	0	-0.781824	0.31	0.749	0	downregulated
LAG3	0	-0.802062	0.377	0.859	0	downregulated
HLA-DMA	0	-0.83518	0.504	0.911	0	downregulated
KLRD1	0	-1.01294	0.042	0.668	0	downregulated
HLA-DPB1	0	-1.01461	0.667	0.975	0	downregulated
CD74	0	-1.09091	0.964	0.999	0	downregulated
PLEK	0	-1.11477	0.044	0.749	0	downregulated
CCL5	0	-1.14586	0.828	0.997	0	downregulated
CST7	0	-1.14773	0.66	0.965	0	downregulated
HLA-DPA1	0	-1.18438	0.673	0.975	0	downregulated
NKG7	0	-1.29108	0.986	0.999	0	downregulated
IFNG	0	-1.29671	0.186	0.798	0	downregulated
HLA-DQB1	0	-1.32384	0.506	0.979	0	downregulated
HLA-DRA	0	-1.38782	0.691	0.988	0	downregulated
HLA-DRB5	0	-1.45853	0.141	0.892	0	downregulated
HLA-DRB1	0	-1.48627	0.647	0.996	0	downregulated
GZMH	0	-1.56117	0.065	0.782	0	downregulated
HLA-DQA1	0	-1.79226	0.171	0.951	0	downregulated
CCL3	0	-2.1453	0.055	0.631	0	downregulated
CCL4	0	-2.42563	0.066	0.735	0	downregulated
PLAC8	2.78838e-306	0.813346	0.646	0.181	5.31939e-302	upregulated
CX3CR1	3.95964e-303	-0.273159	0.009	0.213	7.5538e-299	downregulated
CD81	1.42044e-301	-0.484235	0.882	0.978	2.70977e-297	downregulated
CTSC	3.84277e-293	-0.585913	0.949	0.99	7.33085e-289	downregulated
SUB1	6.54018e-285	-0.370922	0.982	0.991	1.24767e-280	downregulated
LEF1	1.17838e-284	0.557956	0.606	0.154	2.24799e-280	upregulated
RPS27	5.18985e-275	0.375879	0.999	0.999	9.90067e-271	upregulated
EOMES	1.67352e-274	-0.389059	0.144	0.507	3.19257e-270	downregulated
MAF	3.2683e-272	-0.49893	0.211	0.598	6.23494e-268	downregulated
FYN	1.33058e-270	-0.504052	0.41	0.771	2.53835e-266	downregulated
C1orf21	8.80003e-267	-0.316948	0.107	0.435	1.67878e-262	downregulated
CD99	9.73729e-267	-0.490562	0.946	0.989	1.85758e-262	downregulated
FGFBP2	1.11702e-266	-1.09269	0.216	0.563	2.13094e-262	downregulated
RPL27A	3.08011e-264	0.396036	0.997	0.992	5.87593e-260	upregulated
CD8B	3.13317e-263	0.529265	0.976	0.925	5.97714e-259	upregulated
IFITM3	1.519e-260	0.651545	0.516	0.084	2.89779e-256	upregulated
LTB	1.70996e-260	0.650748	1	0.98	3.26209e-256	upregulated
LYAR	1.67257e-259	-0.551349	0.506	0.808	3.19076e-255	downregulated
FLT3LG	9.20138e-258	0.538774	0.755	0.381	1.75535e-253	upregulated
KLRG1	2.31514e-257	-0.379277	0.082	0.376	4.4166e-253	downregulated
SUSD3	3.88533e-256	0.477112	0.556	0.137	7.41204e-252	upregulated
CTSW	3.69388e-252	0.580088	0.89	0.613	7.04681e-248	upregulated
BPGM	7.12242e-251	-0.408457	0.231	0.595	1.35874e-246	downregulated
LY6E	7.68171e-251	0.535907	0.982	0.947	1.46544e-246	upregulated
ANXA1	2.41438e-248	-0.652632	0.824	0.925	4.6059e-244	downregulated
GZMB	2.48286e-248	-1.10061	0.697	0.91	4.73655e-244	downregulated
IL7R	1.74166e-246	0.611133	0.647	0.213	3.32256e-242	upregulated
GNLY	2.33922e-240	-1.95397	0.096	0.387	4.46254e-236	downregulated
FAU	8.45362e-239	0.252954	0.999	1	1.6127e-234	upregulated
FABP5	9.10965e-239	-0.870278	0.634	0.839	1.73785e-234	downregulated
LGALS3BP	6.70603e-233	0.467297	0.523	0.117	1.27931e-228	upregulated
GSTP1	7.316e-231	-0.453518	0.932	0.981	1.39567e-226	downregulated
TXNIP	1.21534e-226	0.65768	0.901	0.642	2.31851e-222	upregulated
ITM2C	8.74447e-226	0.533652	0.598	0.183	1.66818e-221	upregulated
ISG20	1.28968e-224	0.601601	0.91	0.715	2.46032e-220	upregulated
TRGC2	3.78814e-224	-0.737293	0.245	0.591	7.22664e-220	downregulated
EBP	1.60113e-219	-0.461578	0.861	0.96	3.05448e-215	downregulated
ALOX5AP	4.52258e-219	-0.555016	0.87	0.963	8.62772e-215	downregulated
EFHD2	4.16524e-218	-0.498036	0.724	0.881	7.94603e-214	downregulated
RCAN3	1.13739e-216	0.443001	0.633	0.265	2.16979e-212	upregulated
MAL	2.20419e-214	0.453503	0.929	0.579	4.20494e-210	upregulated
RPS29	2.29728e-213	0.293619	0.998	0.998	4.38251e-209	upregulated
IKZF3	9.25298e-211	-0.438356	0.283	0.637	1.76519e-206	downregulated
CLU	3.66771e-206	-0.268948	0.127	0.424	6.99689e-202	downregulated
KLF6	7.06414e-205	-0.580802	0.817	0.964	1.34763e-200	downregulated
SMCO4	3.46411e-204	-0.380868	0.344	0.69	6.60848e-200	downregulated
PHLDA1	1.63426e-203	-0.567011	0.464	0.777	3.11767e-199	downregulated
CD52	4.13664e-203	0.498863	0.999	0.98	7.89146e-199	upregulated
LAIR2	2.64425e-199	-0.252587	0.003	0.126	5.04443e-195	downregulated
CD55	1.52674e-196	0.472426	0.84	0.634	2.91257e-192	upregulated
OSTF1	8.2432e-196	-0.385414	0.891	0.962	1.57256e-191	downregulated
ASB2	1.49104e-194	-0.296759	0.178	0.494	2.84445e-190	downregulated
AQP3	2.00586e-193	0.668004	0.538	0.183	3.82659e-189	upregulated
MIR155HG	9.56361e-193	-0.32456	0.08	0.324	1.82445e-188	downregulated
RPL30	2.47486e-191	0.260617	0.999	1	4.72129e-187	upregulated
RPL10	1.09144e-190	0.271952	1	1	2.08214e-186	upregulated
RPS11	2.39942e-188	0.281526	1	0.997	4.57737e-184	upregulated
PLA2G16	1.23512e-184	-0.367153	0.297	0.617	2.35623e-180	downregulated
EGLN3	2.86875e-184	0.482518	0.456	0.099	5.4727e-180	upregulated
ZBTB38	3.00496e-183	-0.352318	0.234	0.55	5.73255e-179	downregulated
CORO1B	5.4354e-183	0.654462	0.696	0.428	1.03691e-178	upregulated
SELL	4.52041e-179	0.459637	0.657	0.314	8.62359e-175	upregulated
ANKRD28	1.5906e-178	-0.394835	0.309	0.629	3.03439e-174	downregulated
CISH	1.60463e-178	0.404623	0.931	0.823	3.06115e-174	upregulated
LITAF	6.294e-176	-0.444944	0.709	0.907	1.20071e-171	downregulated
RPL14	6.93854e-176	0.257928	1	1	1.32367e-171	upregulated
PRDX1	2.61685e-175	-0.399162	0.931	0.965	4.99217e-171	downregulated
IL32	1.11072e-174	0.330617	1	0.998	2.11892e-170	upregulated
SOCS1	5.87418e-173	0.516376	0.821	0.628	1.12062e-168	upregulated
GALM	5.54804e-172	-0.361568	0.325	0.613	1.0584e-167	downregulated
CCL4L2	8.83428e-171	-0.934186	0.005	0.121	1.68531e-166	downregulated
RPL37	1.21741e-170	0.259511	1	0.999	2.32245e-166	upregulated
BATF	1.63858e-169	-0.429063	0.601	0.818	3.12592e-165	downregulated
GIMAP7	1.66195e-169	0.465928	0.966	0.869	3.1705e-165	upregulated
HAPLN3	4.18332e-169	0.385156	0.548	0.217	7.98052e-165	upregulated
PDE6G	9.08282e-169	0.331884	0.349	0.031	1.73273e-164	upregulated
DRAP1	1.89562e-167	0.330178	0.973	0.951	3.61627e-163	upregulated
PRF1	4.51397e-165	-0.63638	0.819	0.932	8.61131e-161	downregulated
RUNX1	1.01671e-162	-0.27847	0.213	0.514	1.93958e-158	downregulated
DBI	1.38303e-162	-0.28545	0.964	0.985	2.63841e-158	downregulated
TMEM2	4.0272e-161	-0.255364	0.157	0.436	7.68268e-157	downregulated
INSIG1	2.27557e-158	-0.39086	0.366	0.644	4.3411e-154	downregulated
RPS19	2.73258e-157	0.340028	1	1	5.21295e-153	upregulated
GCHFR	2.19074e-155	0.432194	0.713	0.469	4.17927e-151	upregulated
TMEM123	1.74725e-153	0.374794	0.884	0.752	3.33322e-149	upregulated
RPL34	4.2218e-152	0.299345	0.999	0.998	8.05393e-148	upregulated
ETFB	2.77119e-151	0.363806	0.929	0.848	5.2866e-147	upregulated
AHNAK	1.01576e-148	-0.393889	0.77	0.919	1.93776e-144	downregulated
OSM	5.13981e-148	0.681953	0.584	0.306	9.80521e-144	upregulated
LST1	8.96387e-146	0.436081	0.814	0.623	1.71004e-141	upregulated
OASL	2.41922e-145	-0.28963	0.253	0.547	4.61514e-141	downregulated
TNFRSF1B	1.64837e-144	-0.429252	0.732	0.889	3.1446e-140	downregulated
IDS	2.99345e-141	-0.352326	0.546	0.789	5.71061e-137	downregulated
DDIT4	3.9333e-141	0.540671	0.743	0.508	7.50355e-137	upregulated
TXN	6.61589e-141	-0.297485	0.975	0.991	1.26211e-136	downregulated
AIF1	1.88698e-140	0.417414	0.763	0.506	3.5998e-136	upregulated
MATK	4.28696e-140	-0.262699	0.158	0.419	8.17823e-136	downregulated
ARHGAP18	2.19259e-139	-0.264346	0.252	0.536	4.1828e-135	downregulated
ATP6V1G1	4.83195e-139	0.311666	0.951	0.908	9.2179e-135	upregulated
ARHGDIA	7.60708e-139	-0.291838	0.91	0.952	1.4512e-134	downregulated
PMAIP1	6.03455e-138	-0.36798	0.309	0.57	1.15121e-133	downregulated
NDUFA12	2.01382e-137	-0.35426	0.93	0.966	3.84176e-133	downregulated
ICAM3	1.92763e-133	0.32363	0.889	0.797	3.67735e-129	upregulated
AC020916.1	2.22681e-133	-0.371305	0.212	0.479	4.24809e-129	downregulated
NAMPT	1.40566e-132	-0.329125	0.42	0.669	2.68157e-128	downregulated
EVL	1.67735e-132	0.310444	0.988	0.967	3.19988e-128	upregulated
MFSD10	8.34006e-132	-0.336046	0.569	0.772	1.59103e-127	downregulated
CD84	6.74329e-131	-0.270032	0.215	0.484	1.28642e-126	downregulated
NQO2	1.6325e-130	-0.305216	0.39	0.665	3.11431e-126	downregulated
PIM1	1.85961e-129	0.339337	0.93	0.85	3.54758e-125	upregulated
CALR	1.82984e-128	-0.340811	0.938	0.964	3.49078e-124	downregulated
FLNA	1.83019e-128	-0.344597	0.922	0.976	3.49146e-124	downregulated
IFI44L	3.53516e-127	0.479253	0.336	0.065	6.74402e-123	upregulated
BACH2	4.55582e-127	0.263771	0.294	0.035	8.69113e-123	upregulated
DUSP1	1.92379e-124	-0.440491	0.441	0.723	3.67001e-120	downregulated
STK17B	5.11712e-123	0.368943	0.943	0.887	9.76192e-119	upregulated
SURF4	1.89391e-122	-0.310655	0.604	0.774	3.61301e-118	downregulated
RPL31	1.97523e-122	0.280909	0.984	0.959	3.76814e-118	upregulated
SQLE	5.81555e-121	-0.304425	0.323	0.567	1.10943e-116	downregulated
RAB27A	1.25083e-120	-0.304526	0.703	0.861	2.3862e-116	downregulated
NOP53	8.23477e-120	0.343956	0.925	0.817	1.57095e-115	upregulated
GIMAP1	9.38317e-120	0.347345	0.825	0.62	1.79003e-115	upregulated
UBE2S	9.52666e-120	-0.470632	0.743	0.89	1.8174e-115	downregulated
CD6	1.99243e-118	-0.319807	0.478	0.721	3.80097e-114	downregulated
NCF4	6.72481e-118	0.377056	0.702	0.515	1.28289e-113	upregulated
CD38	1.86183e-117	0.335327	0.578	0.296	3.55181e-113	upregulated
PTTG1	5.44486e-117	-0.355098	0.632	0.858	1.03872e-112	downregulated
CA6	1.44352e-116	0.284415	0.251	0.017	2.75381e-112	upregulated
ODC1	8.97259e-116	-0.394034	0.359	0.578	1.7117e-111	downregulated
PDLIM1	1.71514e-114	-0.275879	0.28	0.532	3.27198e-110	downregulated
HOPX	3.87174e-114	-0.376632	0.879	0.95	7.38611e-110	downregulated
SPINT2	1.28887e-112	0.278159	0.302	0.056	2.45879e-108	upregulated
RIPOR2	1.58443e-112	0.350903	0.839	0.644	3.02262e-108	upregulated
RASAL3	2.54731e-112	-0.287713	0.482	0.738	4.8595e-108	downregulated
SEC11C	5.65618e-112	-0.33986	0.723	0.845	1.07903e-107	downregulated
FXYD5	8.86924e-112	0.300814	0.983	0.967	1.69198e-107	upregulated
CD70	9.58594e-111	-0.332953	0.471	0.743	1.82871e-106	downregulated
FOS	1.2265e-110	-0.550471	0.331	0.582	2.3398e-106	downregulated
MBD2	2.22051e-110	-0.300035	0.718	0.836	4.23606e-106	downregulated
IL13	6.93824e-109	-0.333488	0.073	0.248	1.32361e-104	downregulated
ATF3	1.91193e-108	-0.295701	0.201	0.444	3.64739e-104	downregulated
GLIPR2	3.35255e-108	0.31646	0.572	0.336	6.39566e-104	upregulated
ICAM2	3.43571e-108	0.333959	0.657	0.448	6.5543e-104	upregulated
ISG15	3.74739e-107	0.511529	0.894	0.818	7.1489e-103	upregulated
FAM3C	4.90079e-107	-0.277752	0.313	0.556	9.34923e-103	downregulated
DHRS3	2.76122e-105	0.267444	0.24	0.022	5.26758e-101	upregulated
PRDX4	2.36098e-103	-0.283648	0.406	0.616	4.50404e-99	downregulated
PDIA6	4.0254e-103	-0.292181	0.845	0.909	7.67926e-99	downregulated
SIT1	3.6058e-102	0.274817	0.927	0.858	6.87878e-98	upregulated
SH2D2A	1.22649e-99	-0.30937	0.609	0.792	2.33978e-95	downregulated
SLFN5	2.70344e-99	0.404422	0.753	0.564	5.15735e-95	upregulated
CD2	3.3855e-99	-0.310918	0.944	0.983	6.45851e-95	downregulated
SH2D1A	3.95831e-98	-0.301707	0.699	0.839	7.55127e-94	downregulated
SRI	4.2024e-97	-0.264448	0.871	0.918	8.01692e-93	downregulated
LIMA1	1.27535e-96	-0.279254	0.372	0.586	2.43299e-92	downregulated
IKZF1	1.42863e-94	0.283234	0.894	0.809	2.72541e-90	upregulated
OXNAD1	2.33427e-94	0.311756	0.622	0.424	4.45309e-90	upregulated
SYNE1	1.06394e-93	-0.263921	0.347	0.588	2.02969e-89	downregulated
NSMCE1	3.68133e-92	0.2908	0.771	0.64	7.02287e-88	upregulated
SLC4A7	5.12773e-92	-0.250483	0.376	0.608	9.78218e-88	downregulated
RCBTB2	5.25901e-92	-0.382696	0.399	0.622	1.00326e-87	downregulated
SMDT1	2.57144e-91	0.27726	0.883	0.791	4.90554e-87	upregulated
HSPA1A	2.78895e-91	-0.324347	0.489	0.692	5.32048e-87	downregulated
TRABD2A	1.21211e-90	0.271755	0.522	0.313	2.31235e-86	upregulated
IQGAP2	7.61428e-90	-0.297655	0.827	0.918	1.45258e-85	downregulated
SERINC5	1.59029e-89	0.271201	0.446	0.215	3.0338e-85	upregulated
GZMK	4.95509e-87	-0.463995	0.254	0.488	9.45282e-83	downregulated
PKM	4.0688e-86	-0.289561	0.956	0.983	7.76204e-82	downregulated
HLA-E	1.13938e-85	0.302883	0.989	0.986	2.17359e-81	upregulated
LPGAT1	1.86141e-85	0.275256	0.665	0.464	3.55102e-81	upregulated
FDPS	9.35906e-84	-0.265104	0.845	0.902	1.78543e-79	downregulated
MIR4435-2HG	1.21629e-83	-0.262421	0.497	0.711	2.32032e-79	downregulated
JUN	2.00435e-82	-0.447448	0.809	0.894	3.8237e-78	downregulated
IER2	2.25081e-82	0.26289	0.947	0.904	4.29387e-78	upregulated
SRSF7	1.36262e-81	-0.266103	0.943	0.97	2.59946e-77	downregulated
HLA-F	4.36516e-81	0.284665	0.877	0.81	8.32742e-77	upregulated
SSBP3	4.78366e-81	0.251378	0.545	0.342	9.12579e-77	upregulated
VSIR	2.68474e-80	0.252828	0.579	0.351	5.12168e-76	upregulated
IDI1	1.91001e-79	-0.261867	0.624	0.768	3.64373e-75	downregulated
SLC9A3R1	3.18899e-79	-0.252621	0.881	0.939	6.08363e-75	downregulated
SH3KBP1	4.50555e-79	-0.253171	0.633	0.801	8.59523e-75	downregulated
PDE4D	6.8963e-78	0.283523	0.522	0.315	1.31561e-73	upregulated
KLF13	1.21244e-76	0.259103	0.839	0.735	2.31297e-72	upregulated
MSI2	4.2506e-76	0.27745	0.676	0.52	8.10888e-72	upregulated
RPL22L1	2.07774e-75	-0.464224	0.648	0.743	3.9637e-71	downregulated
SLC16A3	8.33429e-75	0.348679	0.665	0.486	1.58993e-70	upregulated
NFKB1	1.57873e-74	0.270629	0.7	0.553	3.01174e-70	upregulated
CYTOR	6.10994e-74	-0.259659	0.713	0.863	1.16559e-69	downregulated
CYCS	1.31202e-73	-0.271702	0.865	0.91	2.50294e-69	downregulated
REG4	1.9054e-73	0.255762	0.196	0.028	3.63494e-69	upregulated
MOSPD3	3.58823e-73	0.265917	0.611	0.425	6.84527e-69	upregulated
MX1	4.73462e-73	0.42513	0.542	0.372	9.03223e-69	upregulated
H2AFZ	4.82361e-73	-0.274429	0.966	0.978	9.20201e-69	downregulated
PPIF	1.26058e-72	-0.25225	0.496	0.659	2.40482e-68	downregulated
LEPROTL1	1.52273e-72	0.250767	0.879	0.805	2.90491e-68	upregulated
BATF3	5.46311e-71	-0.518278	0.367	0.514	1.0422e-66	downregulated
PLSCR1	5.89629e-71	0.296814	0.586	0.422	1.12484e-66	upregulated
SMAP1	8.00408e-70	0.25845	0.752	0.65	1.52694e-65	upregulated
PPP1R15A	4.0916e-69	-0.268435	0.541	0.732	7.80555e-65	downregulated
IVNS1ABP	1.08771e-67	-0.26087	0.466	0.661	2.07503e-63	downregulated
HSP90AB1	1.86718e-67	-0.505537	0.953	0.965	3.56201e-63	downregulated
GLIPR1	4.57776e-66	-0.265466	0.547	0.727	8.73299e-62	downregulated
TRIM22	1.05597e-65	0.350317	0.516	0.33	2.01448e-61	upregulated
NBDY	8.18743e-65	0.271198	0.723	0.589	1.56192e-60	upregulated
TUBA1B	5.44623e-64	-0.329202	0.913	0.938	1.03898e-59	downregulated
XAF1	1.35717e-63	0.333787	0.593	0.436	2.58908e-59	upregulated
SH3BP5	1.9049e-63	0.263652	0.675	0.547	3.63397e-59	upregulated
ACAT2	3.42225e-63	-0.253229	0.608	0.732	6.52862e-59	downregulated
IGFBP2	5.80352e-62	0.350046	0.154	0.015	1.10714e-57	upregulated
ETS1	1.67114e-61	0.254054	0.88	0.812	3.18802e-57	upregulated
PDE3B	4.04757e-61	0.252489	0.657	0.506	7.72155e-57	upregulated
CDKN2D	3.91475e-60	0.329322	0.672	0.525	7.46816e-56	upregulated
PRDX3	2.16709e-59	-0.26132	0.751	0.818	4.13415e-55	downregulated
ZFP36	5.03305e-58	-0.361025	0.534	0.68	9.60154e-54	downregulated
C4orf3	7.13983e-58	0.29329	0.936	0.912	1.36207e-53	upregulated
PARP9	1.45079e-55	0.252651	0.578	0.424	2.76767e-51	upregulated
RRM2	7.99894e-54	-0.284217	0.494	0.676	1.52596e-49	downregulated
TUBB4B	8.33285e-51	-0.251229	0.761	0.868	1.58966e-46	downregulated
HSPA5	1.02993e-49	-0.275567	0.808	0.858	1.9648e-45	downregulated
BIRC5	1.18576e-47	-0.253925	0.497	0.674	2.26208e-43	downregulated
TCP1	1.51082e-46	-0.25018	0.719	0.779	2.88219e-42	downregulated
HPGD	1.77062e-45	-0.28345	0.575	0.714	3.37782e-41	downregulated
TNFSF10	4.4123e-45	0.417088	0.827	0.802	8.41735e-41	upregulated
NPM1	6.70007e-42	-0.291892	0.988	0.994	1.27817e-37	downregulated
HSPD1	1.00772e-41	-0.462731	0.804	0.838	1.92244e-37	downregulated
HSPE1	4.91463e-41	-0.351861	0.887	0.913	9.37563e-37	downregulated
NCL	2.39769e-39	-0.297018	0.92	0.935	4.57407e-35	downregulated
XCL1	3.06137e-39	0.589149	0.257	0.135	5.84017e-35	upregulated
ITM2A	3.47535e-39	-0.298446	0.723	0.801	6.62992e-35	downregulated
IFI6	4.32551e-39	0.286502	0.694	0.625	8.25177e-35	upregulated
FAM162A	2.41444e-27	0.405968	0.769	0.724	4.60604e-23	upregulated
PGK1	1.43326e-21	0.300972	0.974	0.971	2.73422e-17	upregulated
STAT1	3.0312e-21	0.332508	0.719	0.681	5.78262e-17	upregulated
IL2RA	2.20184e-12	-0.369702	0.464	0.472	4.20045e-08	downregulated
LGALS3	9.48671e-12	0.334545	0.676	0.711	1.80978e-07	upregulated
