# Supplementary material for: CRISPR/Cas-mediated non-viral genome specific targeted CAR T cells achieve high safety and efficacy in relapsed/refractory B-cell non-Hodgkin lymphoma
Source: Research Square preprint supplement (doi:10.21203/rs.3.rs-373651/v1), 2021-04-03
Supplement: Supplementary file 5 [file 247b5a4bfee216cadd63657b.xlsx]

## Sheet: sheet1
Table S9: Differentially expressed genes in CD8+/CAR+ T cells between day 7/12 and day 28/29 samples after infusion
*Calculated by two-sided Wilcoxon rank sum test in Seurat R package
**P-value corrected using Bonferroni method in Seurat R package
Gene	p_val*	avg_logFC	pct.1 (D7/D12)	pct.2 (D28/D29)	p_val_adj**	up_down
HBB	1.03326e-76	1.43369	0.859	0.11	1.97115e-72	upregulated
RPS27	9.05309e-75	-0.525054	1	1	1.72706e-70	downregulated
GAPDH	1.39446e-74	0.777096	0.998	0.969	2.66021e-70	upregulated
ACTG1	8.15837e-70	0.840594	0.999	0.969	1.55637e-65	upregulated
NFKBIA	1.17442e-63	1.18549	0.893	0.361	2.24045e-59	upregulated
GIMAP7	2.03808e-63	-0.927095	0.879	0.965	3.88805e-59	downregulated
ACTB	3.43166e-60	0.732347	1	1	6.54657e-56	upregulated
RPS29	3.84084e-60	-0.472164	1	1	7.32717e-56	downregulated
HBA2	1.72248e-58	1.07025	0.771	0.101	3.28597e-54	upregulated
B2M	1.69043e-55	-0.293684	1	1	3.22484e-51	downregulated
ARHGDIB	5.21935e-55	0.531854	0.999	0.96	9.95695e-51	upregulated
TXNIP	3.32722e-53	-0.67598	0.985	0.996	6.34734e-49	downregulated
RPL34	4.49942e-46	-0.378301	1	1	8.58354e-42	downregulated
RPL37A	1.04343e-44	-0.382692	1	1	1.99054e-40	downregulated
COTL1	2.52926e-44	0.813239	0.928	0.568	4.82507e-40	upregulated
SLC25A5	3.04308e-44	0.665895	0.949	0.634	5.80529e-40	upregulated
RPL21	1.5516e-43	-0.340507	1	1	2.95999e-39	downregulated
CORO1A	1.67751e-43	0.468076	0.999	0.96	3.20019e-39	upregulated
RPS25	1.06507e-42	-0.367165	1	1	2.03183e-38	downregulated
HMGB2	1.58306e-42	0.999485	0.941	0.599	3.02e-38	upregulated
RPL41	7.89283e-41	-0.292976	1	1	1.50571e-36	downregulated
PIK3R1	4.5677e-40	0.756678	0.861	0.357	8.71381e-36	upregulated
PMAIP1	3.71885e-39	0.78236	0.731	0.207	7.09446e-35	upregulated
RPL39	9.94902e-39	-0.28846	1	1	1.89797e-34	downregulated
RPS27A	1.3357e-38	-0.316246	1	1	2.54812e-34	downregulated
RPS14	4.50398e-38	-0.329772	1	1	8.59224e-34	downregulated
MALAT1	4.60223e-38	-0.714245	0.999	1	8.77967e-34	downregulated
TNFAIP3	5.35366e-38	0.772101	0.857	0.379	1.02132e-33	upregulated
RPL30	6.19018e-38	-0.301815	1	1	1.1809e-33	downregulated
RPS12	8.62533e-38	-0.308773	1	1	1.64545e-33	downregulated
RPL26	6.49102e-37	-0.280413	1	1	1.23829e-32	downregulated
CFL1	8.50017e-37	0.391466	1	1	1.62158e-32	upregulated
RPL13	2.56626e-36	-0.312561	1	1	4.89565e-32	downregulated
RPL23A	4.01916e-36	-0.302606	0.999	1	7.66736e-32	downregulated
RPL27A	9.95914e-36	-0.361145	0.998	1	1.8999e-31	downregulated
ARPC2	1.31074e-35	0.379698	0.999	0.982	2.50051e-31	upregulated
HBA1	1.31379e-34	0.770878	0.523	0.044	2.50631e-30	upregulated
RPS19	7.57852e-34	-0.333956	1	1	1.44575e-29	downregulated
S100A11	1.60194e-33	-0.57636	0.873	0.938	3.05602e-29	downregulated
RBM38	6.24191e-33	0.520577	0.661	0.15	1.19077e-28	upregulated
RPL32	1.53932e-32	-0.285049	1	1	2.93656e-28	downregulated
PFN1	4.0196e-32	0.33575	0.999	1	7.66819e-28	upregulated
LGALS1	5.87512e-32	0.712217	0.971	0.837	1.1208e-27	upregulated
CLDND1	1.27328e-31	0.696129	0.708	0.256	2.42903e-27	upregulated
CXCR4	2.7142e-31	0.616958	0.902	0.48	5.17787e-27	upregulated
RPS28	3.03415e-31	-0.275051	1	1	5.78825e-27	downregulated
LCP1	4.30995e-31	0.484999	0.983	0.815	8.22209e-27	upregulated
RGS1	6.58335e-31	0.802311	0.669	0.22	1.25591e-26	upregulated
SLC25A3	1.53399e-30	0.46987	0.95	0.705	2.92639e-26	upregulated
EIF1	3.55699e-30	0.345847	1	0.991	6.78567e-26	upregulated
MRPL10	1.5275e-29	0.518369	0.76	0.282	2.91402e-25	upregulated
RBM3	2.41008e-29	0.487156	0.95	0.63	4.5977e-25	upregulated
RPS8	3.52393e-29	-0.253792	1	1	6.72261e-25	downregulated
HIST1H1C	3.60874e-29	0.675466	0.759	0.326	6.8844e-25	upregulated
ARPC4	3.95149e-29	0.481658	0.927	0.634	7.53826e-25	upregulated
RPS18	5.26685e-29	-0.293537	1	1	1.00476e-24	downregulated
ATG2A	9.96965e-29	0.572486	0.662	0.198	1.90191e-24	upregulated
PDE4D	1.96332e-28	0.487174	0.538	0.101	3.74542e-24	upregulated
RPL9	2.23285e-28	-0.345012	1	0.996	4.25961e-24	downregulated
ANP32B	6.72173e-28	0.623434	0.879	0.595	1.2823e-23	upregulated
RPL36	8.29127e-28	-0.303194	0.999	1	1.58173e-23	downregulated
CD2	8.69358e-28	-0.534367	0.94	0.96	1.65847e-23	downregulated
RPL38	1.31885e-27	-0.294827	0.999	1	2.51596e-23	downregulated
RPL10	1.4112e-27	-0.263196	1	1	2.69215e-23	downregulated
CALM3	8.59966e-27	0.507493	0.908	0.617	1.64056e-22	upregulated
RPS21	2.17153e-26	-0.302324	0.999	1	4.14262e-22	downregulated
ATP5A1	4.34687e-26	0.43484	0.89	0.52	8.29253e-22	upregulated
APOBEC3H	1.26794e-25	0.455017	0.558	0.132	2.41885e-21	upregulated
HMGN2	4.07736e-25	0.816255	0.927	0.709	7.77838e-21	upregulated
HMGA1	4.11378e-25	0.472562	0.682	0.238	7.84786e-21	upregulated
ATP5B	8.49622e-25	0.43046	0.906	0.59	1.62082e-20	upregulated
ATP5C1	1.01811e-24	0.443458	0.91	0.568	1.94225e-20	upregulated
UBC	2.26031e-24	0.333752	1	0.991	4.31199e-20	upregulated
CD69	2.33491e-24	0.723996	0.833	0.441	4.45431e-20	upregulated
CACYBP	2.50521e-24	0.445713	0.742	0.339	4.77919e-20	upregulated
TMEM2	3.47054e-24	0.535306	0.613	0.198	6.62076e-20	upregulated
ATF4	3.81868e-24	0.402672	0.711	0.247	7.2849e-20	upregulated
STMN1	6.39899e-24	1.06986	0.474	0.11	1.22073e-19	upregulated
COX8A	1.28823e-23	0.398916	0.97	0.841	2.45756e-19	upregulated
MKI67	1.64966e-23	0.781332	0.388	0.04	3.14706e-19	upregulated
ATP5G2	3.44506e-23	0.321609	0.996	0.943	6.57215e-19	upregulated
RHOA	5.72177e-23	0.352764	0.974	0.797	1.09154e-18	upregulated
RPS10	6.37835e-23	-0.255813	1	1	1.2168e-18	downregulated
H3F3B	1.87572e-22	0.308732	1	1	3.5783e-18	upregulated
BTF3	1.87956e-22	0.282125	0.999	0.996	3.58563e-18	upregulated
HNRNPA1	1.89476e-22	0.329639	0.996	0.916	3.61463e-18	upregulated
S100A8	2.5177e-22	1.63517	0.466	0.119	4.80302e-18	upregulated
CALM1	2.54702e-22	0.2795	1	0.996	4.85896e-18	upregulated
VIM	5.105e-22	0.486511	0.98	0.93	9.73881e-18	upregulated
BCL2L11	7.59922e-22	0.404404	0.544	0.145	1.4497e-17	upregulated
PCLAF	1.61917e-21	0.679226	0.366	0.035	3.0889e-17	upregulated
MYL6	1.80381e-21	0.255429	1	0.996	3.44113e-17	upregulated
ATP5L	1.89624e-21	0.258959	0.998	0.982	3.61745e-17	upregulated
NPM1	2.73877e-21	0.317318	0.997	0.974	5.22476e-17	upregulated
HSP90AA1	3.65662e-21	0.439579	0.988	0.912	6.97573e-17	upregulated
HMGB1	7.38458e-21	0.393268	0.999	0.969	1.40876e-16	upregulated
PPP1CA	8.79093e-21	0.314891	0.982	0.841	1.67705e-16	upregulated
WTAP	9.39327e-21	0.369267	0.722	0.3	1.79195e-16	upregulated
HNRNPC	1.06197e-20	0.372675	0.948	0.811	2.02592e-16	upregulated
RPL36A	1.23611e-20	-0.390493	0.951	0.952	2.35812e-16	downregulated
IFITM2	1.28006e-20	-0.515996	0.79	0.903	2.44196e-16	downregulated
CLEC2B	1.45682e-20	0.39659	0.965	0.753	2.77917e-16	upregulated
PTTG1	1.54374e-20	0.565124	0.481	0.128	2.945e-16	upregulated
MRPL47	1.61154e-20	0.377237	0.691	0.269	3.07434e-16	upregulated
MGAT4A	2.57609e-20	0.41462	0.684	0.282	4.91441e-16	upregulated
NFKBIZ	3.24112e-20	0.412608	0.518	0.145	6.18308e-16	upregulated
ARF1	3.70588e-20	0.378901	0.923	0.612	7.06971e-16	upregulated
ATXN1	3.88394e-20	0.391054	0.67	0.273	7.40939e-16	upregulated
SNRPD1	4.1174e-20	0.436249	0.819	0.458	7.85477e-16	upregulated
APOBEC3C	4.92578e-20	0.421354	0.808	0.423	9.39691e-16	upregulated
IDH2	8.12362e-20	0.39604	0.858	0.493	1.54974e-15	upregulated
GIMAP4	9.04801e-20	-0.505744	0.859	0.899	1.72609e-15	downregulated
ATP5G3	9.26301e-20	0.325483	0.954	0.815	1.7671e-15	upregulated
BTG3	1.36985e-19	0.35156	0.589	0.194	2.61325e-15	upregulated
RHOH	1.66163e-19	0.399491	0.722	0.317	3.16988e-15	upregulated
MT1E	2.43868e-19	0.470295	0.643	0.269	4.65227e-15	upregulated
ARHGDIA	2.82077e-19	0.379908	0.85	0.476	5.38117e-15	upregulated
AP2S1	3.35621e-19	0.384292	0.866	0.515	6.40264e-15	upregulated
TOMM22	6.05206e-19	0.35496	0.733	0.33	1.15455e-14	upregulated
MIR4435-2HG	7.52528e-19	0.348913	0.716	0.3	1.4356e-14	upregulated
PSMA4	7.61726e-19	0.433136	0.858	0.564	1.45314e-14	upregulated
NDUFB9	8.5371e-19	0.337756	0.903	0.581	1.62862e-14	upregulated
STAT1	8.99618e-19	-0.52798	0.606	0.731	1.7162e-14	downregulated
UQCRC1	9.17506e-19	0.292063	0.581	0.185	1.75033e-14	upregulated
HLA-DRA	9.65654e-19	0.498034	0.846	0.542	1.84218e-14	upregulated
RGS10	1.04465e-18	0.380696	0.924	0.63	1.99288e-14	upregulated
POMP	1.15385e-18	0.381712	0.932	0.718	2.20119e-14	upregulated
ANAPC15	1.17973e-18	0.348747	0.56	0.189	2.25057e-14	upregulated
TKT	1.20492e-18	0.373216	0.737	0.33	2.29862e-14	upregulated
PIM3	1.21883e-18	0.424037	0.575	0.207	2.32516e-14	upregulated
OSER1	1.58452e-18	0.302845	0.457	0.11	3.02279e-14	upregulated
PTBP1	2.06839e-18	0.380033	0.587	0.225	3.94587e-14	upregulated
LINC01871	2.15055e-18	-0.661209	0.535	0.687	4.10261e-14	downregulated
IL7R	2.49134e-18	-0.757477	0.108	0.3	4.75273e-14	downregulated
SUB1	2.51872e-18	0.270601	0.998	0.965	4.80496e-14	upregulated
FAM46C	2.62303e-18	0.329193	0.456	0.11	5.00396e-14	upregulated
SRSF10	3.58431e-18	0.452898	0.744	0.419	6.83778e-14	upregulated
WDR1	3.92546e-18	0.359599	0.803	0.441	7.48861e-14	upregulated
CHCHD2	4.09839e-18	0.298894	0.997	0.969	7.81851e-14	upregulated
YWHAE	4.3799e-18	0.435429	0.693	0.339	8.35553e-14	upregulated
ZBTB1	5.08043e-18	0.333567	0.571	0.198	9.69194e-14	upregulated
SFPQ	7.07132e-18	0.392763	0.819	0.476	1.349e-13	upregulated
CD38	7.50853e-18	0.319685	0.445	0.115	1.4324e-13	upregulated
H2AFY	7.65392e-18	0.403548	0.715	0.357	1.46014e-13	upregulated
HNRNPR	7.77642e-18	0.379376	0.857	0.52	1.48351e-13	upregulated
FABP5	7.87365e-18	0.457561	0.703	0.361	1.50206e-13	upregulated
FAM133B	8.37808e-18	0.364167	0.758	0.366	1.59829e-13	upregulated
GGCT	9.78668e-18	0.338575	0.485	0.15	1.867e-13	upregulated
HNRNPA3	1.2154e-17	0.350541	0.956	0.797	2.31862e-13	upregulated
UBE2L3	1.25019e-17	0.338144	0.901	0.617	2.38498e-13	upregulated
RAD23B	1.45451e-17	0.321069	0.557	0.185	2.77476e-13	upregulated
HNRNPDL	1.46903e-17	0.367847	0.952	0.744	2.80248e-13	upregulated
SMC3	1.47946e-17	0.420904	0.686	0.326	2.82236e-13	upregulated
UCP2	3.02201e-17	0.395844	0.948	0.731	5.76508e-13	upregulated
PSMA2	3.1607e-17	0.3617	0.862	0.573	6.02967e-13	upregulated
TUFM	3.2792e-17	0.336904	0.779	0.374	6.25572e-13	upregulated
CBX3	3.44552e-17	0.419281	0.825	0.551	6.57302e-13	upregulated
ALYREF	3.71601e-17	0.373389	0.574	0.211	7.08903e-13	upregulated
HINT2	4.15369e-17	0.329252	0.572	0.211	7.924e-13	upregulated
MXD4	4.67698e-17	0.388589	0.766	0.414	8.92228e-13	upregulated
CCNL1	5.05072e-17	0.395405	0.871	0.573	9.63526e-13	upregulated
MRPL54	5.44131e-17	0.336393	0.892	0.59	1.03804e-12	upregulated
DBI	5.6943e-17	0.310547	0.975	0.837	1.0863e-12	upregulated
EIF5A	5.95161e-17	0.394417	0.886	0.639	1.13539e-12	upregulated
RIOK3	7.36139e-17	0.325641	0.64	0.256	1.40433e-12	upregulated
NAMPT	7.47077e-17	0.268477	0.456	0.123	1.4252e-12	upregulated
HMGB3	7.60976e-17	0.30971	0.27	0.013	1.45171e-12	upregulated
GTF2B	7.97211e-17	0.270506	0.577	0.198	1.52084e-12	upregulated
NFIL3	1.00838e-16	0.28764	0.362	0.066	1.92368e-12	upregulated
C16orf87	1.07592e-16	0.286834	0.546	0.176	2.05253e-12	upregulated
NDUFA2	1.29428e-16	0.325332	0.889	0.59	2.4691e-12	upregulated
SH2D1A	1.32398e-16	0.358138	0.823	0.476	2.52576e-12	upregulated
WHAMM	1.41586e-16	0.332974	0.55	0.194	2.70104e-12	upregulated
COG3	1.50548e-16	0.282976	0.399	0.088	2.87201e-12	upregulated
KRR1	1.97604e-16	0.330573	0.671	0.291	3.76969e-12	upregulated
TFDP1	2.13302e-16	0.325197	0.468	0.141	4.06917e-12	upregulated
NDUFA4	2.63009e-16	0.282298	0.989	0.877	5.01741e-12	upregulated
PSMB1	2.6506e-16	0.290578	0.964	0.736	5.05654e-12	upregulated
ENSA	2.68496e-16	0.342714	0.821	0.454	5.12209e-12	upregulated
SDE2	2.8159e-16	0.273674	0.331	0.048	5.37189e-12	upregulated
BHLHE40	2.95059e-16	0.35512	0.604	0.238	5.62883e-12	upregulated
ANXA2	3.08169e-16	0.424132	0.91	0.7	5.87894e-12	upregulated
PPP1CC	3.31639e-16	0.34212	0.713	0.33	6.32668e-12	upregulated
VPS37B	3.62648e-16	0.304727	0.524	0.172	6.91824e-12	upregulated
CDCA7	3.8212e-16	0.360932	0.327	0.053	7.28971e-12	upregulated
PARK7	3.95089e-16	0.287544	0.978	0.859	7.53711e-12	upregulated
MRPL37	4.05603e-16	0.263819	0.447	0.123	7.7377e-12	upregulated
HIST1H1D	4.09148e-16	0.477632	0.798	0.471	7.80533e-12	upregulated
MZT1	4.52108e-16	0.272697	0.451	0.123	8.62487e-12	upregulated
DDX39A	4.65096e-16	0.370961	0.503	0.176	8.87264e-12	upregulated
COX6C	4.70832e-16	0.277872	0.99	0.956	8.98207e-12	upregulated
ODC1	6.54932e-16	0.310105	0.533	0.189	1.24941e-11	upregulated
SNRPC	6.86398e-16	0.309587	0.791	0.388	1.30944e-11	upregulated
CNN2	7.02247e-16	0.331792	0.939	0.718	1.33968e-11	upregulated
TYMS	7.12004e-16	0.75009	0.278	0.026	1.35829e-11	upregulated
MGEA5	7.45123e-16	0.3274	0.691	0.308	1.42147e-11	upregulated
GMNN	7.71914e-16	0.343216	0.332	0.062	1.47258e-11	upregulated
BUD31	8.17097e-16	0.332453	0.808	0.436	1.55878e-11	upregulated
NASP	9.13724e-16	0.591111	0.668	0.366	1.74311e-11	upregulated
STT3B	9.43221e-16	0.255294	0.474	0.141	1.79938e-11	upregulated
IFNG	1.1025e-15	0.346259	0.448	0.132	2.10323e-11	upregulated
TXNDC17	1.1109e-15	0.333371	0.703	0.348	2.11927e-11	upregulated
PELI1	1.36836e-15	0.266172	0.309	0.044	2.61041e-11	upregulated
SNRPB	1.5671e-15	0.343272	0.935	0.709	2.98956e-11	upregulated
UBALD2	1.58439e-15	0.37883	0.85	0.52	3.02254e-11	upregulated
MRPL28	1.67799e-15	0.273611	0.628	0.26	3.2011e-11	upregulated
MYL6B	1.76575e-15	0.269859	0.39	0.097	3.36852e-11	upregulated
MRPL23	2.00889e-15	0.283199	0.582	0.22	3.83237e-11	upregulated
RPLP0	2.46979e-15	0.267823	0.999	0.969	4.71162e-11	upregulated
KIAA1551	2.61027e-15	-0.554586	0.657	0.709	4.97961e-11	downregulated
CX3CR1	2.62562e-15	-0.706947	0.425	0.555	5.0089e-11	downregulated
EWSR1	2.92659e-15	0.319106	0.727	0.357	5.58305e-11	upregulated
SRSF9	2.94003e-15	0.283754	0.935	0.678	5.60869e-11	upregulated
ZNF394	3.22785e-15	0.304797	0.498	0.163	6.15776e-11	upregulated
PSMD3	3.35461e-15	0.261917	0.475	0.15	6.39958e-11	upregulated
RBM17	3.41768e-15	0.287877	0.592	0.229	6.51991e-11	upregulated
TGFBR3	4.13928e-15	0.316091	0.595	0.238	7.89651e-11	upregulated
URM1	4.26491e-15	0.271318	0.531	0.189	8.13617e-11	upregulated
DBNL	4.34463e-15	0.294519	0.68	0.291	8.28825e-11	upregulated
SRSF3	4.99193e-15	0.38306	0.93	0.762	9.52311e-11	upregulated
ENO1	5.45112e-15	0.384763	0.95	0.806	1.03991e-10	upregulated
TPM3	5.72387e-15	0.316995	0.966	0.793	1.09194e-10	upregulated
ARPC5L	6.01248e-15	0.314154	0.878	0.546	1.147e-10	upregulated
TRA2B	6.66209e-15	0.390326	0.829	0.533	1.27093e-10	upregulated
UQCRC2	6.69046e-15	0.302519	0.715	0.344	1.27634e-10	upregulated
CST7	9.24338e-15	-0.275722	0.998	0.996	1.76336e-10	downregulated
MCM4	1.02579e-14	0.390553	0.273	0.035	1.95691e-10	upregulated
GZMM	1.0443e-14	-0.345452	0.881	0.921	1.99221e-10	downregulated
CARHSP1	1.12067e-14	0.341398	0.664	0.317	2.13791e-10	upregulated
GDE1	1.14179e-14	0.269635	0.374	0.093	2.17818e-10	upregulated
TWISTNB	1.29059e-14	0.254488	0.445	0.132	2.46207e-10	upregulated
UQCRFS1	1.68914e-14	0.314552	0.869	0.524	3.22238e-10	upregulated
SRP72	1.94994e-14	0.299261	0.699	0.33	3.7199e-10	upregulated
CNOT1	2.29105e-14	0.290171	0.648	0.278	4.37063e-10	upregulated
MCM5	2.31065e-14	0.427875	0.435	0.15	4.40803e-10	upregulated
KRT10	3.0017e-14	0.293715	0.887	0.586	5.72635e-10	upregulated
YPEL5	4.18094e-14	0.299989	0.632	0.278	7.97598e-10	upregulated
FKBP1A	4.19346e-14	0.312927	0.864	0.595	7.99987e-10	upregulated
MAP3K8	4.50869e-14	0.324072	0.446	0.15	8.60122e-10	upregulated
HNRNPL	4.53509e-14	0.266036	0.601	0.26	8.65159e-10	upregulated
H2AFV	4.6991e-14	0.420091	0.826	0.577	8.96448e-10	upregulated
ATP5F1	5.45393e-14	0.304518	0.808	0.493	1.04045e-09	upregulated
HIST1H1E	5.7153e-14	0.382608	0.659	0.322	1.09031e-09	upregulated
ATP5D	6.02941e-14	0.261175	0.959	0.819	1.15023e-09	upregulated
DUSP5	6.6461e-14	0.262026	0.309	0.057	1.26788e-09	upregulated
SETD2	7.64707e-14	0.250146	0.425	0.128	1.45883e-09	upregulated
SRP19	7.92931e-14	0.260144	0.728	0.352	1.51267e-09	upregulated
DNAJB1	8.17904e-14	0.319923	0.735	0.388	1.56031e-09	upregulated
CENPF	8.64093e-14	0.517354	0.247	0.026	1.64843e-09	upregulated
SUMO1	8.67734e-14	0.295082	0.884	0.577	1.65538e-09	upregulated
RNF19A	9.23894e-14	0.31173	0.728	0.361	1.76251e-09	upregulated
BIRC5	9.47412e-14	0.498159	0.238	0.022	1.80738e-09	upregulated
NAP1L1	9.64778e-14	0.327835	0.901	0.678	1.84051e-09	upregulated
HIST2H2AC	9.6747e-14	0.382658	0.539	0.229	1.84564e-09	upregulated
DDIT4	1.00884e-13	0.311849	0.329	0.075	1.92457e-09	upregulated
SREK1	1.10853e-13	0.263962	0.597	0.264	2.11475e-09	upregulated
TPM4	1.14012e-13	0.324302	0.566	0.247	2.175e-09	upregulated
PSMD13	1.16047e-13	0.279187	0.755	0.388	2.21383e-09	upregulated
KLF2	1.16254e-13	-0.300048	0.982	0.965	2.21778e-09	downregulated
COX6A1	1.16881e-13	0.269675	0.95	0.837	2.22974e-09	upregulated
NDUFA10	1.30076e-13	0.286307	0.675	0.304	2.48146e-09	upregulated
LMNB1	1.30155e-13	0.28447	0.365	0.097	2.48297e-09	upregulated
PKM	1.45139e-13	0.32703	0.739	0.405	2.76881e-09	upregulated
LDHA	1.46533e-13	0.412009	0.864	0.621	2.79541e-09	upregulated
GADD45B	1.55406e-13	0.318778	0.663	0.304	2.96468e-09	upregulated
MZT2B	1.68739e-13	0.272069	0.961	0.815	3.21904e-09	upregulated
SNW1	1.7885e-13	0.275296	0.664	0.3	3.41191e-09	upregulated
IQGAP2	1.9066e-13	0.3298	0.737	0.401	3.63721e-09	upregulated
BTG1	1.9122e-13	-0.319038	0.983	0.987	3.6479e-09	downregulated
HNRNPH1	1.92268e-13	0.337346	0.87	0.604	3.6679e-09	upregulated
CTBP1	1.93847e-13	0.278753	0.615	0.273	3.69802e-09	upregulated
C1QBP	2.18684e-13	0.325806	0.759	0.441	4.17184e-09	upregulated
NR4A2	2.35304e-13	0.36597	0.382	0.115	4.48889e-09	upregulated
COX7A2	2.47003e-13	0.271362	0.972	0.841	4.71207e-09	upregulated
CAP1	2.52874e-13	0.270214	0.942	0.762	4.82407e-09	upregulated
DAZAP1	2.79851e-13	0.251916	0.569	0.229	5.33871e-09	upregulated
SNRPA1	2.93182e-13	0.288859	0.569	0.242	5.59303e-09	upregulated
HELLS	3.2447e-13	0.309876	0.412	0.137	6.18992e-09	upregulated
FBXO7	3.27705e-13	0.277832	0.629	0.278	6.25163e-09	upregulated
BCLAF1	3.37001e-13	0.331888	0.766	0.445	6.42897e-09	upregulated
MT1X	3.647e-13	0.291682	0.729	0.361	6.95739e-09	upregulated
CBX5	3.84376e-13	0.306338	0.461	0.172	7.33274e-09	upregulated
HMGXB4	3.93463e-13	0.251709	0.411	0.128	7.50609e-09	upregulated
FTL	4.37259e-13	-0.265316	0.999	1	8.3416e-09	downregulated
HLA-F	4.65376e-13	-0.303734	0.932	0.899	8.87799e-09	downregulated
COPS3	4.74976e-13	0.255819	0.478	0.176	9.06112e-09	upregulated
ZNF326	5.6106e-13	0.260671	0.444	0.154	1.07033e-08	upregulated
SNRPA	6.41926e-13	0.277544	0.631	0.291	1.2246e-08	upregulated
DDX5	6.47557e-13	-0.251266	0.994	0.987	1.23534e-08	downregulated
ARF5	6.63525e-13	0.287522	0.785	0.419	1.26581e-08	upregulated
RSL24D1	7.13146e-13	0.30625	0.888	0.621	1.36047e-08	upregulated
TLN1	7.47824e-13	0.279542	0.903	0.656	1.42662e-08	upregulated
YWHAZ	8.51709e-13	0.25587	0.988	0.899	1.62481e-08	upregulated
PPIA	1.15599e-12	0.319443	0.995	0.978	2.20528e-08	upregulated
RBBP6	1.21631e-12	0.298199	0.63	0.291	2.32035e-08	upregulated
PCBP2	1.25877e-12	0.261391	0.935	0.648	2.40136e-08	upregulated
EZH2	1.28128e-12	0.278708	0.451	0.167	2.4443e-08	upregulated
PSMB2	1.59619e-12	0.321768	0.81	0.515	3.04504e-08	upregulated
EIF4A1	1.67469e-12	0.256178	0.656	0.3	3.19481e-08	upregulated
N4BP2L2	1.71106e-12	-0.373042	0.737	0.753	3.26419e-08	downregulated
NDUFB11	1.84214e-12	0.276014	0.944	0.714	3.51425e-08	upregulated
PNN	2.16386e-12	0.321521	0.843	0.555	4.12799e-08	upregulated
LDHB	2.36149e-12	0.256185	0.976	0.837	4.50502e-08	upregulated
P4HB	2.37173e-12	0.316211	0.809	0.493	4.52456e-08	upregulated
HNRNPM	2.41956e-12	0.299299	0.846	0.529	4.61579e-08	upregulated
HNRNPU	2.63003e-12	0.317238	0.904	0.683	5.01731e-08	upregulated
PPP2CA	2.70675e-12	0.269448	0.595	0.26	5.16366e-08	upregulated
NUDT21	2.73489e-12	0.266251	0.573	0.251	5.21734e-08	upregulated
SNRPF	2.92059e-12	0.302737	0.861	0.656	5.57162e-08	upregulated
H2AFZ	3.71054e-12	0.561706	0.868	0.643	7.07859e-08	upregulated
PSMD7	3.71655e-12	0.258836	0.801	0.467	7.09006e-08	upregulated
HLA-DMA	3.84828e-12	0.26637	0.606	0.273	7.34136e-08	upregulated
ZWINT	3.95462e-12	0.302825	0.225	0.026	7.54422e-08	upregulated
HSPD1	4.00097e-12	0.335487	0.594	0.286	7.63266e-08	upregulated
BTG2	4.15966e-12	0.306593	0.542	0.242	7.93539e-08	upregulated
ATP6V0E1	4.66827e-12	-0.293815	0.884	0.859	8.90565e-08	downregulated
RPN2	4.84802e-12	0.26632	0.697	0.361	9.24857e-08	upregulated
CYC1	5.59206e-12	0.276625	0.697	0.344	1.0668e-07	upregulated
DECR1	6.26344e-12	0.257037	0.764	0.419	1.19488e-07	upregulated
SBDS	6.31875e-12	0.253149	0.568	0.247	1.20543e-07	upregulated
RTRAF	6.51532e-12	0.268694	0.892	0.674	1.24293e-07	upregulated
GNB2	6.71735e-12	0.27079	0.791	0.445	1.28147e-07	upregulated
PARVG	7.72655e-12	0.263055	0.576	0.251	1.47399e-07	upregulated
CLSPN	7.87511e-12	0.312602	0.238	0.035	1.50233e-07	upregulated
TALDO1	8.21779e-12	0.291545	0.802	0.52	1.56771e-07	upregulated
CASP4	8.47983e-12	0.28316	0.835	0.493	1.6177e-07	upregulated
RPA3	8.568e-12	0.396415	0.579	0.313	1.63452e-07	upregulated
PCNA	8.84297e-12	0.662752	0.395	0.159	1.68697e-07	upregulated
NUDT1	8.89911e-12	0.319483	0.575	0.286	1.69768e-07	upregulated
H1FX	9.05354e-12	0.371879	0.825	0.559	1.72714e-07	upregulated
LSM4	9.17333e-12	0.331861	0.658	0.374	1.75e-07	upregulated
HDAC1	9.3205e-12	0.264193	0.759	0.419	1.77807e-07	upregulated
MCM7	9.32832e-12	0.357677	0.319	0.093	1.77956e-07	upregulated
HIST1H1B	9.93742e-12	0.414898	0.227	0.031	1.89576e-07	upregulated
NONO	1.0909e-11	0.269069	0.722	0.396	2.08112e-07	upregulated
GTF3C6	1.13225e-11	0.287824	0.796	0.507	2.16e-07	upregulated
GNAI2	1.22833e-11	0.254653	0.963	0.806	2.34329e-07	upregulated
SF3B6	1.50417e-11	0.274972	0.905	0.634	2.8695e-07	upregulated
TUBA1C	1.88535e-11	0.301926	0.374	0.123	3.59669e-07	upregulated
SEC61B	1.95358e-11	0.257784	0.97	0.797	3.72684e-07	upregulated
CCL3	1.98061e-11	0.493032	0.406	0.159	3.77841e-07	upregulated
NDUFS2	2.07533e-11	0.250467	0.652	0.313	3.95911e-07	upregulated
SLBP	2.77427e-11	0.278457	0.489	0.211	5.29248e-07	upregulated
XBP1	3.05125e-11	-0.428954	0.473	0.564	5.82087e-07	downregulated
MT1F	3.19107e-11	0.25573	0.449	0.181	6.0876e-07	upregulated
ZYX	4.18948e-11	0.254304	0.626	0.308	7.99227e-07	upregulated
IFITM1	4.26891e-11	-0.357093	0.804	0.855	8.14381e-07	downregulated
MYO1G	4.44328e-11	0.296528	0.831	0.542	8.47645e-07	upregulated
DEK	4.72472e-11	0.387147	0.873	0.648	9.01334e-07	upregulated
TMPO	5.27662e-11	0.346947	0.573	0.3	1.00662e-06	upregulated
CYTIP	6.44518e-11	0.280458	0.744	0.441	1.22955e-06	upregulated
MYH9	6.72453e-11	0.261965	0.905	0.692	1.28284e-06	upregulated
ARPC5	8.96046e-11	0.283543	0.908	0.714	1.70939e-06	upregulated
USP1	9.04864e-11	0.254062	0.481	0.207	1.72621e-06	upregulated
GINS2	1.0962e-10	0.261743	0.207	0.026	2.09122e-06	upregulated
EIF4G2	1.17967e-10	0.272004	0.823	0.537	2.25045e-06	upregulated
DDOST	1.19787e-10	0.252687	0.853	0.542	2.28518e-06	upregulated
SRRM1	1.20284e-10	0.266457	0.89	0.643	2.29465e-06	upregulated
LTB	1.58325e-10	-0.653824	0.656	0.709	3.02036e-06	downregulated
MBP	1.92786e-10	-0.511564	0.499	0.568	3.67779e-06	downregulated
SIRPG	2.52306e-10	0.252817	0.533	0.247	4.81325e-06	upregulated
STK17B	2.67138e-10	0.299426	0.812	0.515	5.09619e-06	upregulated
CD74	2.80673e-10	0.263525	0.982	0.916	5.3544e-06	upregulated
EMP3	3.15948e-10	-0.251692	0.995	0.982	6.02735e-06	downregulated
FYB1	3.57057e-10	0.285992	0.915	0.687	6.81158e-06	upregulated
TPX2	4.02645e-10	0.276878	0.218	0.04	7.68126e-06	upregulated
CDKN3	4.07298e-10	0.290639	0.212	0.035	7.77002e-06	upregulated
POLR1D	4.31778e-10	0.260961	0.893	0.617	8.23703e-06	upregulated
RRM2	5.05189e-10	0.388004	0.196	0.026	9.63748e-06	upregulated
PGAM1	7.61465e-10	0.258085	0.831	0.537	1.45265e-05	upregulated
TXN	7.84284e-10	0.275723	0.893	0.74	1.49618e-05	upregulated
OSTF1	9.98127e-10	0.267079	0.824	0.546	1.90413e-05	upregulated
GSTP1	1.15748e-09	0.250019	0.912	0.696	2.20812e-05	upregulated
TUBB	1.51922e-09	0.609761	0.627	0.379	2.89821e-05	upregulated
PPP1R15A	1.5809e-09	0.265813	0.589	0.304	3.01588e-05	upregulated
HNRNPA2B1	2.19512e-09	0.295278	0.977	0.943	4.18764e-05	upregulated
TK1	2.26892e-09	0.280616	0.206	0.04	4.32841e-05	upregulated
NUSAP1	2.3278e-09	0.383567	0.273	0.084	4.44075e-05	upregulated
PGK1	2.69243e-09	0.266055	0.822	0.59	5.13635e-05	upregulated
CENPM	2.79784e-09	0.266455	0.276	0.084	5.33744e-05	upregulated
SNRPE	3.20746e-09	0.292965	0.79	0.564	6.11888e-05	upregulated
LIM2	4.38371e-09	0.364726	0.181	0.026	8.3628e-05	upregulated
TRAF3IP3	4.50282e-09	-0.306814	0.875	0.806	8.59003e-05	downregulated
SRSF2	5.55818e-09	0.303411	0.818	0.59	0.000106033	upregulated
GPR171	8.04585e-09	-0.434637	0.24	0.357	0.000153491	downregulated
S100A12	1.24952e-08	0.454882	0.136	0.004	0.000238371	upregulated
S1PR1	1.68973e-08	-0.363157	0.148	0.264	0.00032235	downregulated
ANP32E	1.76782e-08	0.329654	0.68	0.423	0.000337248	upregulated
NUCKS1	4.79452e-08	0.275207	0.827	0.639	0.00091465	upregulated
GIMAP1	5.10419e-08	-0.425036	0.561	0.577	0.000973726	downregulated
DNAJC9	6.13122e-08	0.25488	0.349	0.154	0.00116965	upregulated
DUSP2	7.48343e-08	0.304095	0.868	0.626	0.00142761	upregulated
CCL4L2	8.34899e-08	-0.429373	0.133	0.251	0.00159274	downregulated
CKS1B	9.08467e-08	0.266757	0.29	0.11	0.00173308	upregulated
S100A9	9.27735e-08	0.885391	0.468	0.256	0.00176984	upregulated
SPN	1.11064e-07	-0.350086	0.727	0.683	0.00211877	downregulated
CCL4	1.13613e-07	-0.333227	0.861	0.828	0.0021674	downregulated
RAN	1.65956e-07	0.301533	0.896	0.762	0.00316595	upregulated
UBE2S	2.3898e-07	0.303188	0.467	0.247	0.00455902	upregulated
TOP2A	4.44857e-07	0.392002	0.169	0.04	0.00848653	upregulated
CHST12	5.07817e-07	-0.324415	0.506	0.546	0.00968763	downregulated
SLFN5	9.21474e-07	-0.390369	0.647	0.626	0.017579	downregulated
C12orf57	1.02686e-06	-0.250575	0.912	0.841	0.0195894	downregulated
ID2	1.19374e-06	-0.283643	0.834	0.819	0.0227729	downregulated
UBE2C	1.40331e-06	0.332008	0.127	0.018	0.0267709	upregulated
GBP5	1.6965e-06	-0.326129	0.803	0.749	0.0323641	downregulated
RIPOR2	1.93274e-06	-0.285323	0.857	0.824	0.0368708	downregulated
HSP90AB1	9.72771e-06	0.292654	0.9	0.762	0.185576	upregulated
ATM	1.11856e-05	-0.338696	0.584	0.573	0.213388	downregulated
FOS	1.3919e-05	0.743589	0.329	0.198	0.265532	upregulated
BTN3A2	1.67054e-05	-0.317377	0.673	0.639	0.318689	downregulated
ZFP36	1.89597e-05	0.271852	0.638	0.432	0.361694	upregulated
GZMK	3.76155e-05	-0.339028	0.78	0.762	0.717591	downregulated
ASCL2	4.27111e-05	-0.363512	0.264	0.352	0.814799	downregulated
PRSS23	5.17232e-05	-0.307428	0.178	0.26	0.986724	downregulated
IL10RA	5.87066e-05	-0.288671	0.672	0.634	1	downregulated
PURA	6.37552e-05	-0.287325	0.168	0.247	1	downregulated
RSBN1L	6.60459e-05	-0.285899	0.507	0.507	1	downregulated
ITGB1	7.09264e-05	-0.282262	0.821	0.789	1	downregulated
MAT2B	0.000146876	-0.25492	0.529	0.52	1	downregulated
XAF1	0.000202174	-0.419942	0.496	0.502	1	downregulated
TRIM22	0.000376086	-0.307916	0.54	0.524	1	downregulated
PCNX4	0.0003769	-0.273008	0.126	0.194	1	downregulated
GBP4	0.000378513	-0.316718	0.622	0.568	1	downregulated
DUT	0.000706164	0.517213	0.6	0.463	1	upregulated
IKZF3	0.00148089	-0.271327	0.728	0.639	1	downregulated
HIST1H4C	0.00154671	0.675201	0.729	0.537	1	upregulated
PRMT2	0.00168599	-0.255832	0.729	0.639	1	downregulated
TOB1	0.00213714	-0.278052	0.38	0.401	1	downregulated
SP4	0.00277267	-0.28128	0.227	0.273	1	downregulated
SAMD9L	0.00292931	-0.3363	0.419	0.427	1	downregulated
TUBA1B	0.00436417	0.898683	0.672	0.599	1	upregulated
STK38	0.0053658	-0.267864	0.473	0.454	1	downregulated
LBH	0.00540725	-0.250094	0.66	0.59	1	downregulated
KLRD1	0.00688806	-0.369964	0.52	0.515	1	downregulated
GIMAP2	0.00703322	-0.253286	0.427	0.419	1	downregulated
PPP1R10	0.0122599	-0.265618	0.292	0.313	1	downregulated
FCGR3A	0.0137579	-0.334756	0.573	0.559	1	downregulated
TTC3	0.0213223	-0.298476	0.325	0.335	1	downregulated
GBP1	0.032062	-0.291151	0.484	0.449	1	downregulated
SORL1	0.0324401	-0.25252	0.256	0.278	1	downregulated
SH2D2A	0.035275	-0.260473	0.385	0.37	1	downregulated
CXCR6	0.0460456	-0.255476	0.232	0.256	1	downregulated
PARP9	0.0469667	-0.338874	0.351	0.344	1	downregulated
The data of patient-3 sample after 28 days treatment is excluded due to an unreliable low CAR+ cell number.
