# Supplementary material for: CRISPR/Cas-mediated non-viral genome specific targeted CAR T cells achieve high safety and efficacy in relapsed/refractory B-cell non-Hodgkin lymphoma
Source: Research Square preprint supplement (doi:10.21203/rs.3.rs-373651/v1), 2021-04-03
Supplement: Supplementary file 6 [file d3961da219f9007c30249d56.xlsx]

## Sheet: sheet1
Table S7: Differentially expressed genes in CD8+/CAR+ T cells between the infusion products (IP) and day 7/12 samples after infusion
*Calculated by two-sided Wilcoxon rank sum test in Seurat R package
**P-value corrected using Bonferroni method in Seurat R package
Gene	p_val*	avg_logFC	pct.1 (IP)	pct.2 (D7/D12)	p_val_adj**	up_down
CISH	0	1.38198	0.948	0.004	0	upregulated
LRRN3	0	1.12333	0.819	0.026	0	upregulated
SOCS1	1.11963e-292	1.19574	0.904	0.1	2.13591e-288	upregulated
MAL	1.02756e-268	1.43169	0.891	0.105	1.96027e-264	upregulated
OSM	1.94878e-250	1.13941	0.677	0.017	3.7177e-246	upregulated
ALOX5AP	1.49416e-248	1.13635	0.885	0.123	2.85042e-244	upregulated
CST7	1.28741e-239	-1.66356	0.725	0.998	2.45599e-235	downregulated
GZMH	2.14698e-238	-2.23169	0.078	0.957	4.09579e-234	downregulated
HDGFL3	1.09605e-234	0.778816	0.8	0.092	2.09094e-230	upregulated
PIM1	4.67351e-234	1.12159	0.961	0.274	8.91565e-230	upregulated
CAPG	1.01822e-233	1.08394	0.835	0.116	1.94246e-229	upregulated
NKG7	7.95482e-233	-1.73292	0.996	1	1.51754e-228	downregulated
LTB	9.14524e-231	2.65742	0.996	0.656	1.74464e-226	upregulated
IL2RA	6.98683e-226	0.797397	0.588	0.005	1.33288e-221	upregulated
CCND2	2.00302e-225	1.3599	0.969	0.403	3.82116e-221	upregulated
CCL5	7.24203e-221	-1.83833	0.896	0.999	1.38156e-216	downregulated
RPS27	1.13599e-212	-0.82969	1	1	2.16713e-208	downregulated
LST1	3.88313e-212	0.965671	0.85	0.153	7.40785e-208	upregulated
ENO1	3.96833e-210	1.40763	1	0.95	7.57038e-206	upregulated
FTL	1.87922e-208	1.14763	1	0.999	3.58499e-204	upregulated
TIMP1	1.20398e-204	0.898095	0.725	0.078	2.29684e-200	upregulated
GNLY	4.37959e-204	-3.42238	0.109	0.899	8.35495e-200	downregulated
HBB	4.77991e-204	-1.66393	0.002	0.859	9.11864e-200	downregulated
RARRES3	1.50718e-202	-1.12981	0.806	0.99	2.87525e-198	downregulated
ITM2C	2.57316e-202	0.691543	0.623	0.037	4.90882e-198	upregulated
RPS29	5.10911e-195	-0.640419	1	1	9.74664e-191	downregulated
SLC16A3	2.05924e-188	0.813937	0.734	0.108	3.92842e-184	upregulated
RFLNB	9.89386e-187	0.930554	0.954	0.371	1.88745e-182	upregulated
TPI1	1.89119e-186	1.52267	0.991	0.803	3.60782e-182	upregulated
BATF3	9.6102e-186	0.67352	0.51	0.009	1.83334e-181	upregulated
DUSP2	1.07594e-184	-1.64731	0.183	0.868	2.05258e-180	downregulated
ATP5E	9.17728e-181	-0.653532	1	1	1.75075e-176	downregulated
MMP25	2.37388e-179	0.437695	0.516	0.013	4.52865e-175	upregulated
CCL4	1.54526e-176	-0.898512	0.092	0.861	2.94789e-172	downregulated
GNA15	2.33819e-175	0.450094	0.549	0.029	4.46057e-171	upregulated
LITAF	2.39767e-175	-1.00944	0.752	0.974	4.57404e-171	downregulated
SATB1	3.09257e-175	1.03309	0.915	0.291	5.89969e-171	upregulated
AK4	3.71512e-174	0.598261	0.486	0.01	7.08733e-170	upregulated
HBA2	1.54207e-170	-1.29208	0.002	0.771	2.94181e-166	downregulated
PLEK	1.70396e-169	-1.196	0.081	0.813	3.25064e-165	downregulated
PGK1	2.29638e-169	1.29467	0.993	0.822	4.3808e-165	upregulated
TMEM123	4.8761e-167	0.782607	0.943	0.345	9.30214e-163	upregulated
RPL39	2.22512e-166	-0.534665	0.998	1	4.24486e-162	downregulated
GAPDH	7.42766e-165	0.885255	1	0.998	1.41697e-160	upregulated
SUSD3	3.66039e-163	0.4555	0.586	0.05	6.98293e-159	upregulated
FRMD4B	5.18858e-163	0.508809	0.614	0.06	9.89826e-159	upregulated
EGLN3	6.16195e-162	0.491249	0.434	0.003	1.17552e-157	upregulated
GCHFR	5.76276e-159	0.677168	0.765	0.158	1.09936e-154	upregulated
TNFSF10	1.5094e-158	1.22594	0.9	0.345	2.87948e-154	upregulated
TRABD2A	1.35058e-156	0.439163	0.59	0.062	2.5765e-152	upregulated
FGFBP2	1.60103e-156	-1.65844	0.216	0.847	3.05428e-152	downregulated
TNFAIP3	2.71309e-154	-1.28455	0.314	0.857	5.17576e-150	downregulated
SOS1	1.11327e-152	0.697433	0.776	0.175	2.12378e-148	upregulated
S100A11	2.26862e-152	1.01547	0.996	0.873	4.32785e-148	upregulated
C20orf204	5.54935e-152	0.382327	0.429	0.007	1.05865e-147	upregulated
RNF157	1.3466e-151	0.605701	0.75	0.152	2.5689e-147	upregulated
DUSP6	5.53246e-151	0.615275	0.641	0.09	1.05543e-146	upregulated
HCST	1.73312e-150	-0.829509	0.983	0.999	3.30628e-146	downregulated
DPP4	3.18098e-150	0.727196	0.882	0.287	6.06835e-146	upregulated
ACTN1	3.32411e-150	0.408633	0.475	0.022	6.3414e-146	upregulated
STX3	8.12353e-150	0.442697	0.518	0.036	1.54973e-145	upregulated
IFITM3	1.80699e-149	0.641328	0.625	0.081	3.4472e-145	upregulated
VIM	7.48074e-149	0.838017	1	0.98	1.4271e-144	upregulated
PKM	1.03535e-148	1.19438	0.97	0.739	1.97513e-144	upregulated
PNP	6.59869e-148	0.596117	0.8	0.208	1.25883e-143	upregulated
NFKBIA	1.61505e-146	-1.33224	0.577	0.893	3.08103e-142	downregulated
RPL37	7.09667e-146	-0.485721	1	1	1.35383e-141	downregulated
TUBA4A	2.10809e-144	1.02992	0.943	0.547	4.02159e-140	upregulated
LEF1	3.45554e-144	0.522569	0.627	0.087	6.59214e-140	upregulated
RPS15A	4.50628e-144	-0.549949	1	1	8.59663e-140	downregulated
PYHIN1	1.08912e-142	-0.978294	0.104	0.759	2.07771e-138	downregulated
LDHA	1.24469e-140	1.196	0.98	0.864	2.37449e-136	upregulated
GPR171	3.17065e-140	0.753648	0.83	0.24	6.04864e-136	upregulated
FYN	4.46411e-139	-0.898224	0.497	0.877	8.51619e-135	downregulated
ITGB1	1.50592e-138	-1.2296	0.357	0.821	2.87285e-134	downregulated
AQP3	7.42645e-137	0.751013	0.497	0.043	1.41674e-132	upregulated
CTSH	1.70136e-136	0.490463	0.453	0.025	3.24568e-132	upregulated
ALDOA	1.73622e-136	0.890246	0.996	0.949	3.31219e-132	upregulated
NCF4	2.66679e-136	0.638358	0.787	0.207	5.08744e-132	upregulated
IL7R	7.2723e-136	0.65641	0.656	0.108	1.38734e-131	upregulated
UBE2T	8.97753e-136	0.728096	0.699	0.165	1.71264e-131	upregulated
TPM4	1.7425e-132	0.849666	0.946	0.566	3.32417e-128	upregulated
PRDX2	1.30777e-131	0.723323	0.974	0.746	2.49484e-127	upregulated
FURIN	1.78598e-131	0.611285	0.797	0.214	3.40712e-127	upregulated
HLA-E	3.40298e-127	-0.687798	0.993	1	6.49187e-123	downregulated
CYTOR	8.9579e-127	-0.824423	0.784	0.928	1.7089e-122	downregulated
PPP2R5C	9.54434e-127	-0.830849	0.856	0.963	1.82077e-122	downregulated
IKBIP	3.31543e-126	0.455948	0.684	0.147	6.32485e-122	upregulated
KRT7	9.45244e-126	0.339915	0.336	0	1.80324e-121	upregulated
MAST4	1.36977e-122	0.276457	0.414	0.022	2.6131e-118	upregulated
JAML	4.69862e-122	0.352501	0.482	0.047	8.96356e-118	upregulated
ZEB2	6.26075e-122	-0.969415	0.068	0.666	1.19436e-117	downregulated
RCAN3	3.82849e-120	0.438573	0.669	0.135	7.30361e-116	upregulated
ENO2	5.34135e-120	0.350479	0.503	0.057	1.01897e-115	upregulated
MRPL17	6.46504e-120	0.551464	0.806	0.26	1.23334e-115	upregulated
HIC1	6.48428e-120	0.298718	0.353	0.008	1.23701e-115	upregulated
NDUFV2	2.61375e-119	0.652061	0.982	0.733	4.98626e-115	upregulated
GZMK	3.9942e-119	-1.76554	0.27	0.78	7.61973e-115	downregulated
TXN	8.25133e-119	0.738387	0.993	0.893	1.57411e-114	upregulated
NCR3	1.18019e-118	0.744416	0.823	0.283	2.25145e-114	upregulated
TEX30	2.69609e-118	0.486165	0.699	0.178	5.14333e-114	upregulated
CRIP1	4.6157e-118	-0.876793	0.776	0.926	8.80537e-114	downregulated
MXD4	6.62479e-118	-0.947345	0.274	0.766	1.26381e-113	downregulated
BCL2	4.51859e-117	0.540024	0.75	0.191	8.62012e-113	upregulated
TMEM14C	1.11031e-116	0.519223	0.797	0.243	2.11814e-112	upregulated
KLRG1	1.17501e-116	-1.02999	0.118	0.681	2.24157e-112	downregulated
MFAP1	1.31272e-115	0.432208	0.689	0.161	2.50428e-111	upregulated
EXOSC3	4.2142e-115	0.434674	0.691	0.174	8.03943e-111	upregulated
RPS26	5.87731e-112	-0.604506	0.998	0.999	1.12121e-107	downregulated
GLUL	6.0307e-112	0.525426	0.656	0.155	1.15048e-107	upregulated
XCL1	4.97763e-111	0.863092	0.364	0.019	9.49582e-107	upregulated
TSC22D3	5.19042e-111	-0.968862	0.49	0.868	9.90176e-107	downregulated
XBP1	6.25466e-111	0.709051	0.915	0.473	1.1932e-106	upregulated
RASGRP1	6.8269e-111	0.682807	0.946	0.529	1.30237e-106	upregulated
RBM39	1.70226e-110	-0.633263	0.943	0.974	3.24741e-106	downregulated
LIF	2.41139e-110	0.34172	0.298	0	4.6002e-106	upregulated
PA2G4	7.24452e-110	0.674261	0.967	0.744	1.38204e-105	upregulated
SLAMF1	5.3914e-109	0.366825	0.56	0.093	1.02852e-104	upregulated
TIGIT	6.61976e-109	-0.862084	0.076	0.643	1.26285e-104	downregulated
TXNIP	7.32039e-109	-0.885154	0.889	0.985	1.39651e-104	downregulated
CLEC2B	8.58828e-109	-0.717655	0.904	0.965	1.63839e-104	downregulated
C12orf65	1.15712e-108	0.404586	0.638	0.139	2.20743e-104	upregulated
CA6	1.8689e-108	0.307457	0.325	0.008	3.5653e-104	upregulated
ARL2	2.11426e-108	0.465711	0.739	0.224	4.03337e-104	upregulated
PNRC1	3.92222e-108	-0.815226	0.699	0.915	7.48241e-104	downregulated
LFNG	3.99383e-108	0.361472	0.586	0.105	7.61904e-104	upregulated
RCBTB2	2.28857e-107	0.303426	0.364	0.02	4.3659e-103	upregulated
PTGER2	6.85997e-107	0.603056	0.832	0.302	1.30868e-102	upregulated
SGO1	3.36549e-106	0.416237	0.547	0.101	6.42034e-102	upregulated
LYST	7.79821e-106	-0.820996	0.368	0.773	1.48766e-101	downregulated
MIR210HG	8.4024e-106	0.314204	0.314	0.007	1.60292e-101	upregulated
SPINT2	3.2304e-105	0.279711	0.338	0.014	6.16264e-101	upregulated
FCGR3A	3.64062e-105	-1.12316	0.011	0.573	6.94521e-101	downregulated
TNFSF14	3.68494e-105	0.268345	0.362	0.021	7.02976e-101	upregulated
HLA-C	4.31329e-105	-0.690243	1	1	8.22846e-101	downregulated
PSMB5	5.47675e-105	0.471183	0.739	0.237	1.0448e-100	upregulated
IL32	7.83057e-105	0.529978	1	1	1.49384e-100	upregulated
RPL41	4.57456e-103	-0.338305	1	1	8.72688e-99	downregulated
SGO2	5.23661e-103	0.509712	0.556	0.11	9.98988e-99	upregulated
UGP2	2.35068e-102	0.575319	0.884	0.421	4.48439e-98	upregulated
RPL38	3.70373e-102	-0.402501	0.996	0.999	7.0656e-98	downregulated
PHF23	7.05499e-102	0.289613	0.521	0.079	1.34588e-97	upregulated
SCOC	1.69662e-101	0.265742	0.527	0.084	3.23664e-97	upregulated
CD27	4.44235e-101	-0.846992	0.83	0.943	8.47467e-97	downregulated
TOP2A	7.78124e-101	1.06166	0.638	0.169	1.48443e-96	upregulated
ATG2A	9.10802e-101	-0.843722	0.163	0.662	1.73754e-96	downregulated
C9orf40	9.86273e-101	0.27753	0.451	0.06	1.88151e-96	upregulated
DARS	1.73506e-100	0.569066	0.885	0.434	3.30998e-96	upregulated
IMPDH2	2.95308e-100	0.540009	0.723	0.238	5.63358e-96	upregulated
SLC39A8	3.9292e-100	0.305638	0.534	0.097	7.49573e-96	upregulated
HMMR	4.77478e-100	0.646766	0.523	0.102	9.10884e-96	upregulated
PTPRC	6.16034e-100	-0.559876	0.991	0.998	1.17521e-95	downregulated
PRF1	8.72902e-100	-0.780031	0.861	0.955	1.66524e-95	downregulated
TYMS	9.55304e-100	0.841908	0.797	0.278	1.82243e-95	upregulated
RPL34	1.94132e-99	-0.398462	1	1	3.70346e-95	downregulated
TGFBR3	2.36834e-99	-0.753907	0.067	0.595	4.51808e-95	downregulated
CALHM2	1.06657e-98	0.344976	0.527	0.09	2.0347e-94	upregulated
AURKA	1.99907e-98	0.422433	0.445	0.063	3.81363e-94	upregulated
PDE6G	4.77503e-98	0.29395	0.379	0.032	9.10933e-94	upregulated
PLAC8	7.63632e-98	0.683397	0.634	0.166	1.45678e-93	upregulated
RAN	1.12821e-97	0.679432	0.978	0.896	2.15229e-93	upregulated
PGAM1	2.74952e-97	0.749272	0.97	0.831	5.24525e-93	upregulated
FLT3LG	1.05887e-96	0.527147	0.754	0.251	2.02e-92	upregulated
MFHAS1	1.47789e-96	0.362445	0.628	0.149	2.81937e-92	upregulated
RGS1	1.9806e-96	-1.03493	0.174	0.669	3.77839e-92	downregulated
ZNF706	2.71164e-96	0.561018	0.933	0.618	5.173e-92	upregulated
ADAM19	2.74999e-96	0.454326	0.713	0.211	5.24616e-92	upregulated
TUBB	3.18168e-96	1.09166	0.946	0.627	6.06969e-92	upregulated
CD81	3.74629e-96	-0.634443	0.917	0.96	7.14679e-92	downregulated
CYSTM1	5.21798e-95	0.307754	0.521	0.096	9.95434e-91	upregulated
HNRNPF	1.72366e-94	0.554207	0.98	0.794	3.28822e-90	upregulated
ASF1B	5.72837e-94	0.4746	0.604	0.155	1.0928e-89	upregulated
PURA	1.08668e-93	0.373055	0.647	0.168	2.07305e-89	upregulated
HBA1	1.10056e-93	-0.894114	0.006	0.523	2.09953e-89	downregulated
HSPA8	1.1183e-93	0.596766	0.998	0.967	2.13338e-89	upregulated
B2M	1.23526e-93	-0.383591	1	1	2.3565e-89	downregulated
MAPKAPK3	2.08845e-93	0.432595	0.76	0.253	3.98413e-89	upregulated
BUB1	2.2653e-93	0.326195	0.457	0.074	4.32151e-89	upregulated
DHRS3	2.90217e-93	0.288746	0.325	0.019	5.53646e-89	upregulated
CD247	2.97866e-93	-0.646149	0.983	0.998	5.68239e-89	downregulated
GPX4	3.16386e-93	0.536728	0.961	0.685	6.0357e-89	upregulated
MZB1	3.52049e-93	0.410808	0.53	0.107	6.71603e-89	upregulated
PPP1R14B	7.94422e-93	0.661621	0.823	0.368	1.51552e-88	upregulated
CCND3	1.26816e-92	0.558341	0.957	0.773	2.41927e-88	upregulated
CDCA3	1.52503e-92	0.395131	0.44	0.066	2.9093e-88	upregulated
CREBRF	1.8558e-92	-0.726336	0.244	0.705	3.54031e-88	downregulated
DDIT4	3.45073e-92	0.729062	0.797	0.329	6.58296e-88	upregulated
AES	4.63028e-92	-0.47014	0.996	1	8.83318e-88	downregulated
MANF	5.27613e-92	0.637386	0.865	0.46	1.00653e-87	upregulated
HLA-B	5.41723e-92	-0.389604	1	1	1.03344e-87	downregulated
ZFP36L2	1.05833e-91	-0.759586	0.824	0.949	2.01898e-87	downregulated
RPS6KA5	8.90725e-91	0.482891	0.678	0.201	1.69924e-86	upregulated
NUF2	5.92512e-90	0.530661	0.534	0.123	1.13034e-85	upregulated
HLA-DPB1	1.4337e-89	-0.755142	0.715	0.913	2.73508e-85	downregulated
RPL17	3.65859e-89	-0.602016	0.908	0.952	6.9795e-85	downregulated
ETFB	1.19937e-88	0.563837	0.959	0.66	2.28805e-84	upregulated
ANXA1	2.49645e-88	-0.788937	0.86	0.934	4.76248e-84	downregulated
RGCC	2.67717e-88	0.345161	0.569	0.132	5.10724e-84	upregulated
CD3G	3.32045e-88	-0.500922	0.974	0.992	6.33442e-84	downregulated
ZBTB32	4.57069e-87	0.327151	0.438	0.07	8.7195e-83	upregulated
PMAIP1	6.18377e-87	-0.898426	0.396	0.731	1.17968e-82	downregulated
SMC2	1.4317e-86	0.572522	0.763	0.3	2.73126e-82	upregulated
PLP2	2.22666e-86	0.569072	0.909	0.489	4.24779e-82	upregulated
GPI	5.74817e-86	0.806653	0.852	0.472	1.09658e-81	upregulated
STIP1	6.25942e-86	0.51283	0.767	0.332	1.19411e-81	upregulated
CXCR3	9.9038e-86	0.562576	0.791	0.34	1.88935e-81	upregulated
TRAT1	9.9695e-86	0.49074	0.675	0.212	1.90188e-81	upregulated
CCNB1	3.7151e-85	0.76363	0.505	0.117	7.08729e-81	upregulated
HILPDA	6.98123e-85	0.334986	0.338	0.033	1.33181e-80	upregulated
PIK3R1	1.25584e-84	-0.800945	0.713	0.861	2.39576e-80	downregulated
REG4	1.30945e-84	0.282899	0.242	0.003	2.49803e-80	upregulated
FAM162A	2.91036e-84	0.923372	0.835	0.434	5.55209e-80	upregulated
RSRP1	3.114e-84	-0.661794	0.774	0.897	5.94059e-80	downregulated
TNFSF8	3.8179e-84	0.419765	0.368	0.043	7.28342e-80	upregulated
IKZF3	4.55535e-84	-0.687304	0.338	0.728	8.69024e-80	downregulated
CD99	5.2716e-84	-0.521459	0.957	0.985	1.00566e-79	downregulated
RPS28	5.3767e-84	-0.321601	1	1	1.02571e-79	downregulated
HEMK1	9.76367e-84	0.267275	0.481	0.087	1.86262e-79	upregulated
HAUS8	1.81429e-83	0.255934	0.482	0.096	3.46111e-79	upregulated
UBE2C	2.53222e-83	0.873214	0.529	0.127	4.83073e-79	upregulated
PCNA	2.71178e-83	0.648047	0.884	0.395	5.17326e-79	upregulated
LDHB	3.29686e-83	0.411096	0.996	0.976	6.28941e-79	upregulated
LYAR	3.31737e-83	-0.759389	0.623	0.839	6.32855e-79	downregulated
COMMD6	3.72259e-83	-0.489357	0.961	0.982	7.10159e-79	downregulated
H2AFX	1.07192e-82	0.789108	0.695	0.28	2.0449e-78	upregulated
PRDX1	1.11297e-82	0.654083	0.945	0.801	2.12321e-78	upregulated
ICAM2	1.45895e-82	0.410007	0.701	0.227	2.78323e-78	upregulated
DLGAP5	1.82676e-82	0.487784	0.477	0.096	3.48492e-78	upregulated
RAB11FIP1	1.93889e-82	0.51989	0.813	0.364	3.69882e-78	upregulated
MAD2L1	2.33384e-82	0.551723	0.736	0.283	4.45226e-78	upregulated
SRSF5	2.99872e-82	-0.4918	0.952	0.975	5.72065e-78	downregulated
RPS21	3.13975e-82	-0.363371	1	0.999	5.98969e-78	downregulated
CCNA2	4.17488e-82	0.525171	0.525	0.132	7.96442e-78	upregulated
H2AFZ	6.60005e-82	0.819828	0.985	0.868	1.25909e-77	upregulated
MLLT3	8.33115e-82	0.394544	0.677	0.207	1.58933e-77	upregulated
ETS1	1.31893e-81	-0.563096	0.913	0.955	2.51612e-77	downregulated
YBX3	2.08969e-81	0.482953	0.815	0.358	3.98651e-77	upregulated
S100A9	2.19211e-81	-1.36869	0	0.468	4.18188e-77	downregulated
ABHD17A	2.32844e-81	-0.621742	0.885	0.939	4.44196e-77	downregulated
MRPL10	2.82247e-81	-0.658277	0.505	0.76	5.38443e-77	downregulated
S100A8	6.24745e-81	-1.86645	0	0.466	1.19183e-76	downregulated
CDK6	1.14921e-80	0.513598	0.843	0.396	2.19236e-76	upregulated
GLO1	1.16881e-80	0.480848	0.839	0.431	2.22973e-76	upregulated
RPL37A	1.24111e-80	-0.323345	1	1	2.36766e-76	downregulated
BCL2L12	4.02012e-80	0.363683	0.634	0.195	7.66918e-76	upregulated
CCR2	5.53125e-80	0.258485	0.338	0.036	1.0552e-75	upregulated
DDX5	1.83901e-79	-0.50109	0.963	0.994	3.50828e-75	downregulated
PCLAF	3.32224e-79	0.742088	0.791	0.366	6.33784e-75	upregulated
CDK1	4.28598e-79	0.669752	0.545	0.154	8.17636e-75	upregulated
NCAPH	6.93634e-79	0.34233	0.508	0.117	1.32324e-74	upregulated
KNSTRN	1.00878e-78	0.296616	0.412	0.069	1.92446e-74	upregulated
ASF1A	1.55564e-78	0.334948	0.634	0.191	2.9677e-74	upregulated
AURKB	1.71571e-78	0.517228	0.512	0.13	3.27307e-74	upregulated
TRGC2	1.96395e-78	-0.902673	0.285	0.697	3.74664e-74	downregulated
PPCDC	2.0963e-78	0.285068	0.503	0.112	3.99912e-74	upregulated
GTSE1	2.71421e-78	0.545177	0.499	0.123	5.1779e-74	upregulated
CKS1B	4.08141e-78	0.65147	0.712	0.29	7.7861e-74	upregulated
UBE2S	9.15212e-78	0.908686	0.832	0.467	1.74595e-73	upregulated
KLRD1	2.53084e-77	-0.971223	0.061	0.52	4.82809e-73	downregulated
TMEM2	2.80365e-77	-0.764112	0.196	0.613	5.34853e-73	downregulated
KIF3A	4.29396e-77	0.315103	0.518	0.12	8.19159e-73	upregulated
PLK1	4.44657e-77	0.459416	0.407	0.07	8.48272e-73	upregulated
TAB2	4.54702e-77	0.372403	0.688	0.223	8.67436e-73	upregulated
CCR7	5.29097e-77	0.361394	0.235	0.006	1.00936e-72	upregulated
TGFBR1	8.74972e-77	0.316833	0.56	0.145	1.66918e-72	upregulated
IFI44L	9.17752e-77	0.521776	0.401	0.066	1.7508e-72	upregulated
CDCA8	1.08477e-76	0.324404	0.464	0.095	2.06942e-72	upregulated
CHCHD2	1.37106e-76	0.392347	0.996	0.997	2.61557e-72	upregulated
IFITM2	1.49152e-76	0.70445	0.983	0.79	2.84538e-72	upregulated
NCAPG	1.70507e-76	0.373893	0.473	0.107	3.25277e-72	upregulated
CDCA5	1.98754e-76	0.317742	0.482	0.104	3.79162e-72	upregulated
RRAS2	1.99582e-76	0.416959	0.762	0.306	3.80742e-72	upregulated
CEP55	2.63163e-76	0.383309	0.523	0.134	5.02035e-72	upregulated
TUBA1B	3.35485e-76	0.881985	0.95	0.672	6.40004e-72	upregulated
TALDO1	1.17625e-75	0.457181	0.963	0.802	2.24393e-71	upregulated
TOP1	1.3456e-75	0.476159	0.891	0.522	2.56699e-71	upregulated
FXYD5	1.82051e-75	0.524747	0.989	0.872	3.47299e-71	upregulated
BCL2L11	1.89483e-75	-0.670248	0.111	0.544	3.61476e-71	downregulated
CENPA	3.19055e-75	0.394759	0.438	0.088	6.08661e-71	upregulated
LAIR2	3.68185e-75	-0.945846	0.004	0.445	7.02386e-71	downregulated
SHCBP1	4.81404e-75	0.305866	0.488	0.113	9.18374e-71	upregulated
SYNE1	5.07665e-75	-0.739623	0.388	0.706	9.68472e-71	downregulated
CDC20	7.94253e-75	0.590826	0.488	0.121	1.5152e-70	upregulated
RRM2	8.15086e-75	0.671563	0.617	0.196	1.55494e-70	upregulated
MRPL51	8.88865e-75	0.474289	0.963	0.735	1.69569e-70	upregulated
TUBA1C	1.3768e-74	0.720786	0.782	0.374	2.62653e-70	upregulated
ITGB2	1.458e-74	-0.496405	0.97	0.988	2.78142e-70	downregulated
ALDOC	1.71738e-74	0.37557	0.433	0.086	3.27624e-70	upregulated
CIP2A	1.88389e-74	0.277295	0.471	0.101	3.5939e-70	upregulated
TK1	1.91682e-74	0.560408	0.625	0.206	3.65671e-70	upregulated
HTATSF1	4.13105e-74	0.553188	0.837	0.411	7.8808e-70	upregulated
DDX6	4.57675e-74	-0.608878	0.686	0.844	8.73107e-70	downregulated
RNF19A	4.9382e-74	-0.706079	0.442	0.728	9.42061e-70	downregulated
FEN1	8.72924e-74	0.506462	0.654	0.239	1.66528e-69	upregulated
KIF15	9.02234e-74	0.320503	0.442	0.091	1.72119e-69	upregulated
SLC1A5	1.61175e-73	0.331902	0.534	0.144	3.07474e-69	upregulated
GZMB	1.631e-73	-0.647953	0.769	0.959	3.11145e-69	downregulated
ANP32B	1.69676e-73	0.49324	0.985	0.879	3.23692e-69	upregulated
KIFC1	1.79633e-73	0.333827	0.455	0.097	3.42686e-69	upregulated
HNRNPAB	2.66873e-73	0.610481	0.871	0.483	5.09113e-69	upregulated
POLR3K	3.60619e-73	0.412407	0.715	0.28	6.87953e-69	upregulated
PSMB10	4.06983e-73	-0.548938	0.725	0.829	7.76402e-69	downregulated
CD44	4.7527e-73	-0.603653	0.641	0.848	9.06673e-69	downregulated
PRDM1	5.24349e-73	-0.712516	0.434	0.726	1.0003e-68	downregulated
LMNA	6.16498e-73	0.322165	0.29	0.026	1.17609e-68	upregulated
RPLP0	6.98949e-73	0.399033	1	0.999	1.33338e-68	upregulated
CLTA	1.54078e-72	0.435911	0.974	0.775	2.93935e-68	upregulated
TNFAIP8L2	1.60805e-72	0.267633	0.455	0.094	3.06767e-68	upregulated
HSPH1	1.89083e-72	0.458646	0.706	0.276	3.60713e-68	upregulated
RPL23	2.74546e-72	0.425464	0.996	0.983	5.23752e-68	upregulated
S100A4	2.95725e-72	-0.460351	0.993	1	5.64154e-68	downregulated
CD84	3.75009e-72	-0.687316	0.25	0.626	7.15405e-68	downregulated
MRPS6	4.26536e-72	0.460967	0.889	0.496	8.13702e-68	upregulated
TUBB4B	5.04469e-72	0.915234	0.813	0.454	9.62375e-68	upregulated
CCNB2	9.34873e-72	0.474577	0.545	0.151	1.78346e-67	upregulated
RPL30	1.22222e-71	-0.28534	1	1	2.33164e-67	downregulated
SNX10	1.90617e-71	0.373915	0.702	0.267	3.63639e-67	upregulated
BAX	2.52284e-71	0.609803	0.976	0.849	4.81282e-67	upregulated
C12orf57	3.59162e-71	-0.640492	0.787	0.912	6.85174e-67	downregulated
ESD	4.22461e-71	0.40193	0.771	0.347	8.05929e-67	upregulated
ARPC5	6.48908e-71	0.403372	0.996	0.908	1.23792e-66	upregulated
RAB33A	4.2477e-70	0.29312	0.582	0.17	8.10333e-66	upregulated
SRGN	4.29006e-70	-0.441954	0.957	0.981	8.18415e-66	downregulated
EBP	5.65239e-70	0.54379	0.906	0.655	1.07831e-65	upregulated
SAC3D1	8.49657e-70	0.337655	0.551	0.157	1.62089e-65	upregulated
AK6	1.27584e-69	0.305076	0.603	0.192	2.43392e-65	upregulated
FARSA	1.2928e-69	0.298348	0.616	0.192	2.46627e-65	upregulated
HOPX	1.6344e-69	0.612894	0.902	0.522	3.11795e-65	upregulated
BLM	1.90864e-69	0.282869	0.506	0.132	3.64111e-65	upregulated
S1PR1	2.39637e-69	0.309514	0.547	0.148	4.57155e-65	upregulated
CCDC34	2.73761e-69	0.334345	0.538	0.148	5.22255e-65	upregulated
DDB2	4.79e-69	0.413934	0.693	0.265	9.13788e-65	upregulated
CDK2AP1	4.90125e-69	0.325865	0.665	0.225	9.35012e-65	upregulated
TUBG1	4.92568e-69	0.268707	0.514	0.139	9.39673e-65	upregulated
TPX2	7.00805e-69	0.597331	0.608	0.218	1.33693e-64	upregulated
RPL26	9.02308e-69	-0.302953	1	1	1.72133e-64	downregulated
YWHAH	1.01198e-68	0.485274	0.817	0.44	1.93056e-64	upregulated
RPS24	1.06972e-68	-0.264507	1	1	2.0407e-64	downregulated
KIF2C	1.29208e-68	0.307206	0.444	0.097	2.46491e-64	upregulated
CDCA2	2.00144e-68	0.304343	0.386	0.073	3.81815e-64	upregulated
CD3D	2.63196e-68	-0.379618	0.998	0.999	5.02099e-64	downregulated
ZNF593	3.377e-68	0.323857	0.571	0.171	6.4423e-64	upregulated
LRR1	3.38845e-68	0.343349	0.586	0.192	6.46414e-64	upregulated
CORO1B	3.42926e-68	0.616029	0.741	0.333	6.54201e-64	upregulated
POLR2H	5.23908e-68	0.472072	0.819	0.413	9.99459e-64	upregulated
SPC25	7.52143e-68	0.367407	0.47	0.112	1.43486e-63	upregulated
CX3CR1	8.57661e-68	-0.543348	0.013	0.425	1.63616e-63	downregulated
RFC2	1.66645e-67	0.338697	0.63	0.212	3.17909e-63	upregulated
LGALS3BP	1.8354e-67	0.313669	0.604	0.184	3.5014e-63	upregulated
DYNLL1	2.47964e-67	0.503318	0.97	0.827	4.73041e-63	upregulated
PLEKHF1	2.74698e-67	0.277682	0.495	0.121	5.24042e-63	upregulated
UQCRB	8.83973e-67	-0.366986	0.983	0.995	1.68636e-62	downregulated
CNIH4	1.06709e-66	0.36225	0.701	0.279	2.03569e-62	upregulated
BNIP3	4.21945e-66	0.654369	0.521	0.174	8.04944e-62	upregulated
TMA7	4.36171e-66	-0.320859	0.996	0.997	8.32084e-62	downregulated
RACGAP1	5.03681e-66	0.277402	0.447	0.105	9.60873e-62	upregulated
RSAD2	6.03941e-66	0.35366	0.344	0.054	1.15214e-61	upregulated
TMSB10	6.84685e-66	0.299572	1	1	1.30617e-61	upregulated
ESCO2	1.18541e-65	0.322475	0.447	0.107	2.2614e-61	upregulated
VDAC1	1.44235e-65	0.501238	0.93	0.675	2.75157e-61	upregulated
ERO1A	1.942e-65	0.433043	0.826	0.43	3.70476e-61	upregulated
CCNL1	2.5296e-65	-0.576608	0.776	0.871	4.82572e-61	downregulated
SLC2A3	2.53394e-65	0.428551	0.834	0.38	4.834e-61	upregulated
CENPW	3.78452e-65	0.420988	0.641	0.234	7.21974e-61	upregulated
VKORC1	3.94888e-65	0.383634	0.799	0.378	7.53329e-61	upregulated
GMPPB	5.96822e-65	0.276992	0.51	0.143	1.13856e-60	upregulated
VAMP2	6.91078e-65	-0.52712	0.778	0.903	1.31837e-60	downregulated
ASPM	8.92478e-65	0.737663	0.529	0.172	1.70258e-60	upregulated
KLRC1	8.9522e-65	-1.00505	0.031	0.428	1.70781e-60	downregulated
PAICS	9.0421e-65	0.458387	0.652	0.252	1.72496e-60	upregulated
FGR	9.89878e-65	-0.476374	0.006	0.4	1.88839e-60	downregulated
UBC	1.33877e-64	-0.394808	1	1	2.55397e-60	downregulated
VEGFB	1.68966e-64	0.316484	0.599	0.194	3.22337e-60	upregulated
ZWINT	2.01873e-64	0.418009	0.638	0.225	3.85112e-60	upregulated
RANBP1	2.30268e-64	0.573312	0.915	0.617	4.39283e-60	upregulated
LINC00861	5.33312e-64	-0.619479	0.17	0.564	1.0174e-59	downregulated
RRM1	8.46295e-64	0.406107	0.739	0.308	1.61448e-59	upregulated
RPL8	1.33339e-63	0.312488	1	1	2.5437e-59	upregulated
CDKN3	1.40713e-63	0.502492	0.595	0.212	2.68439e-59	upregulated
RPS11	1.7969e-63	0.304578	1	1	3.42795e-59	upregulated
IGFBP2	2.41191e-63	0.441626	0.185	0.003	4.60121e-59	upregulated
MND1	2.8477e-63	0.257897	0.458	0.115	5.43256e-59	upregulated
MOSPD3	6.47997e-63	0.379417	0.645	0.238	1.23618e-58	upregulated
EFHD2	7.54952e-63	-0.59586	0.83	0.877	1.44022e-58	downregulated
IL18R1	1.71905e-62	0.252258	0.346	0.059	3.27943e-58	upregulated
RALB	2.83707e-62	0.257375	0.447	0.107	5.41229e-58	upregulated
LTA	5.10355e-62	0.3314	0.357	0.067	9.73604e-58	upregulated
HMGB1	7.93758e-62	0.442235	1	0.999	1.51425e-57	upregulated
LSM2	8.44057e-62	0.41173	0.921	0.684	1.61021e-57	upregulated
CARHSP1	1.01387e-61	0.477947	0.943	0.664	1.93415e-57	upregulated
YWHAZ	1.02357e-61	-0.391528	0.974	0.988	1.95267e-57	downregulated
EPC1	1.55136e-61	-0.529833	0.662	0.803	2.95952e-57	downregulated
CIRBP	1.79328e-61	-0.482981	0.902	0.928	3.42104e-57	downregulated
CSE1L	2.43609e-61	0.256008	0.499	0.145	4.64733e-57	upregulated
CD55	5.19539e-61	0.477501	0.889	0.502	9.91124e-57	upregulated
CBFB	5.28251e-61	0.384257	0.723	0.322	1.00774e-56	upregulated
RPL35A	5.72945e-61	-0.296741	1	1	1.09301e-56	downregulated
NME1	8.02372e-61	0.536605	0.839	0.505	1.53068e-56	upregulated
RIOX2	8.34555e-61	0.268225	0.394	0.087	1.59208e-56	upregulated
CKAP2L	8.57496e-61	0.276719	0.405	0.09	1.63585e-56	upregulated
NUSAP1	9.68125e-61	0.608593	0.656	0.273	1.84689e-56	upregulated
P4HA1	1.46125e-60	0.284712	0.453	0.117	2.78762e-56	upregulated
FKBP4	1.75213e-60	0.317508	0.521	0.161	3.34254e-56	upregulated
PTDSS1	8.13851e-60	0.304177	0.654	0.242	1.55258e-55	upregulated
MRPL27	9.25541e-60	0.381156	0.819	0.423	1.76565e-55	upregulated
NUCKS1	1.10822e-59	0.484982	0.965	0.827	2.11415e-55	upregulated
C1orf35	1.30904e-59	0.300144	0.638	0.227	2.49725e-55	upregulated
CARD19	1.48365e-59	0.285348	0.617	0.209	2.83037e-55	upregulated
CHCHD10	1.81667e-59	0.443386	0.869	0.501	3.46566e-55	upregulated
SNRPG	2.21183e-59	0.398805	0.97	0.829	4.21952e-55	upregulated
HAPLN3	4.03317e-59	0.293605	0.603	0.205	7.69407e-55	upregulated
IRF1	4.81025e-59	-0.576541	0.926	0.932	9.17651e-55	downregulated
KIF14	6.54593e-59	0.301104	0.351	0.069	1.24877e-54	upregulated
CKS2	9.67643e-59	0.60309	0.71	0.336	1.84597e-54	upregulated
MATK	1.38454e-58	-0.587193	0.207	0.569	2.64129e-54	downregulated
HSPA1A	1.41523e-58	0.34805	0.551	0.176	2.69984e-54	upregulated
VMP1	1.50933e-58	0.473508	0.841	0.464	2.87934e-54	upregulated
CENPF	2.31475e-58	0.677711	0.619	0.247	4.41584e-54	upregulated
MYC	2.79871e-58	0.361488	0.51	0.16	5.3391e-54	upregulated
CDK4	3.65781e-58	0.374725	0.689	0.303	6.97801e-54	upregulated
EVI2B	4.13251e-58	-0.583422	0.555	0.771	7.88359e-54	downregulated
DEGS1	5.14364e-58	0.368627	0.81	0.392	9.81252e-54	upregulated
HJURP	5.74459e-58	0.26785	0.379	0.082	1.09589e-53	upregulated
MTHFD2	6.51808e-58	0.344371	0.68	0.274	1.24346e-53	upregulated
RAD23A	6.74825e-58	0.418798	0.896	0.6	1.28736e-53	upregulated
CENPM	8.42168e-58	0.39129	0.686	0.276	1.6066e-53	upregulated
BRCA1	8.64404e-58	0.273204	0.499	0.147	1.64902e-53	upregulated
C14orf119	9.48781e-58	0.287074	0.697	0.273	1.80999e-53	upregulated
EXOSC8	1.57898e-57	0.374104	0.747	0.358	3.01222e-53	upregulated
DDX39A	1.78889e-57	0.459503	0.839	0.503	3.41266e-53	upregulated
CENPE	2.53743e-57	0.455117	0.494	0.158	4.84066e-53	upregulated
MRPL12	2.78107e-57	0.454198	0.741	0.358	5.30545e-53	upregulated
ABRACL	2.9464e-57	0.388103	0.957	0.779	5.62085e-53	upregulated
GPANK1	3.20014e-57	0.255031	0.621	0.215	6.1049e-53	upregulated
KIF11	3.30178e-57	0.334793	0.523	0.165	6.2988e-53	upregulated
CLIC3	5.64525e-57	-0.767281	0.189	0.566	1.07694e-52	downregulated
GZMM	6.12819e-57	-0.613515	0.799	0.881	1.16907e-52	downregulated
ZBP1	6.18597e-57	-0.507243	0.055	0.422	1.1801e-52	downregulated
CCNF	8.67129e-57	0.263788	0.377	0.086	1.65422e-52	upregulated
TRBC2	1.32462e-56	-0.681662	0.939	0.969	2.52698e-52	downregulated
MIF	1.51195e-56	0.515075	0.957	0.779	2.88435e-52	upregulated
PRDX3	1.94292e-56	0.420863	0.834	0.48	3.7065e-52	upregulated
HSPD1	3.00477e-56	0.672641	0.867	0.594	5.73221e-52	upregulated
GRAP2	4.27758e-56	0.387923	0.78	0.391	8.16033e-52	upregulated
KIF23	5.38358e-56	0.276999	0.384	0.09	1.02703e-51	upregulated
APOBEC3G	5.52855e-56	-0.496454	0.915	0.926	1.05468e-51	downregulated
NFKB1	5.86399e-56	0.355568	0.769	0.351	1.11867e-51	upregulated
H2AFJ	8.92069e-56	0.399026	0.826	0.438	1.7018e-51	upregulated
NUDT1	1.33178e-55	0.476303	0.885	0.575	2.54063e-51	upregulated
ATP5I	1.92294e-55	-0.416677	0.943	0.944	3.66839e-51	downregulated
PRDX4	2.05341e-55	0.303466	0.536	0.183	3.91729e-51	upregulated
PPIA	2.12343e-55	0.341674	1	0.995	4.05088e-51	upregulated
NUP62	2.41371e-55	0.28247	0.599	0.225	4.60463e-51	upregulated
ADGRG1	2.53617e-55	-0.640926	0.024	0.377	4.83825e-51	downregulated
TOMM7	2.56339e-55	-0.37253	0.989	0.982	4.89017e-51	downregulated
LAGE3	4.01767e-55	0.350055	0.804	0.402	7.6645e-51	upregulated
C19orf48	5.37623e-55	0.364069	0.634	0.26	1.02562e-50	upregulated
HDDC3	5.38682e-55	0.28022	0.617	0.232	1.02764e-50	upregulated
PYCR2	5.657e-55	0.280534	0.647	0.252	1.07919e-50	upregulated
DHFR	1.2138e-54	0.404847	0.695	0.311	2.31556e-50	upregulated
FOXM1	1.50984e-54	0.250261	0.445	0.125	2.88033e-50	upregulated
GPX1	1.90744e-54	0.416139	0.861	0.546	3.63882e-50	upregulated
PRC1	2.23831e-54	0.362287	0.553	0.198	4.27002e-50	upregulated
EAPP	2.7348e-54	-0.489902	0.59	0.757	5.21718e-50	downregulated
DNAJB1	3.05096e-54	-0.5742	0.567	0.735	5.82032e-50	downregulated
MAT2A	3.8399e-54	0.306591	0.66	0.261	7.32539e-50	upregulated
PNISR	4.72767e-54	-0.471873	0.911	0.948	9.01898e-50	downregulated
MYBL2	4.75699e-54	0.30487	0.516	0.165	9.07491e-50	upregulated
ACTL6A	5.54077e-54	0.274323	0.617	0.235	1.05701e-49	upregulated
H3F3B	5.95484e-54	-0.329853	1	1	1.136e-49	downregulated
DCTPP1	6.09777e-54	0.411058	0.712	0.335	1.16327e-49	upregulated
PSMB8	9.87868e-54	0.322106	0.996	0.957	1.88456e-49	upregulated
CBR1	1.22717e-53	0.302796	0.641	0.26	2.34108e-49	upregulated
RPS27L	1.39358e-53	0.587205	0.98	0.85	2.65854e-49	upregulated
CDKN1A	1.75231e-53	0.262983	0.292	0.049	3.34288e-49	upregulated
PSMG1	2.58139e-53	0.287867	0.623	0.247	4.92453e-49	upregulated
STMN1	2.59457e-53	0.549805	0.861	0.474	4.94966e-49	upregulated
MRPL35	2.75133e-53	0.259716	0.647	0.254	5.24871e-49	upregulated
MKI67	3.35972e-53	0.70552	0.725	0.388	6.40933e-49	upregulated
FCMR	3.47438e-53	-0.48816	0.133	0.493	6.62808e-49	downregulated
TNF	8.07426e-53	0.254468	0.264	0.039	1.54033e-48	upregulated
CLSPN	8.68717e-53	0.351647	0.627	0.238	1.65725e-48	upregulated
NOSIP	1.25817e-52	0.457962	0.969	0.724	2.40021e-48	upregulated
CCT5	1.33584e-52	0.451035	0.895	0.668	2.54838e-48	upregulated
ATXN1	1.70749e-52	-0.537482	0.433	0.67	3.25738e-48	downregulated
LAG3	2.02374e-52	-0.523603	0.416	0.706	3.86068e-48	downregulated
PPDPF	2.38452e-52	-0.457553	0.909	0.955	4.54895e-48	downregulated
IL13	2.60455e-52	0.488037	0.15	0.001	4.96869e-48	upregulated
CDT1	2.98554e-52	0.308371	0.612	0.223	5.69551e-48	upregulated
CCT8	3.95578e-52	0.38742	0.957	0.749	7.54644e-48	upregulated
MDFIC	5.75435e-52	0.308584	0.704	0.307	1.09776e-47	upregulated
BRI3BP	7.39274e-52	0.254126	0.506	0.167	1.41031e-47	upregulated
PET100	1.34234e-51	-0.443138	0.813	0.839	2.56078e-47	downregulated
LSM5	1.59917e-51	0.409984	0.889	0.602	3.05074e-47	upregulated
MRPL57	2.00115e-51	0.352141	0.922	0.657	3.81759e-47	upregulated
LGALS3	3.07144e-51	0.75238	0.658	0.338	5.85939e-47	upregulated
DUT	5.87999e-51	0.541747	0.895	0.6	1.12173e-46	upregulated
PSME1	6.07737e-51	-0.322693	0.994	0.99	1.15938e-46	downregulated
MORF4L2	6.1552e-51	0.274135	0.601	0.236	1.17423e-46	upregulated
RPS2	6.58711e-51	0.357332	1	1	1.25662e-46	upregulated
MRPL14	8.62195e-51	0.34635	0.852	0.493	1.64481e-46	upregulated
ACTR3	9.4413e-51	0.360137	0.982	0.848	1.80112e-46	upregulated
SPOCK2	1.07161e-50	0.393581	0.85	0.449	2.04432e-46	upregulated
MALAT1	1.09583e-50	-0.755457	0.998	0.999	2.09052e-46	downregulated
FLNA	1.5084e-50	-0.395747	0.941	0.966	2.87757e-46	downregulated
YBX1	2.5292e-50	0.381739	0.989	0.972	4.82496e-46	upregulated
DTYMK	2.53296e-50	0.385668	0.667	0.323	4.83212e-46	upregulated
HLA-A	3.13495e-50	-0.319926	1	1	5.98054e-46	downregulated
PHGDH	3.9196e-50	0.274217	0.488	0.159	7.47742e-46	upregulated
CENPH	4.09296e-50	0.308621	0.59	0.23	7.80815e-46	upregulated
PCMT1	4.20131e-50	0.349843	0.882	0.563	8.01484e-46	upregulated
LSM4	4.74381e-50	0.43126	0.904	0.658	9.04977e-46	upregulated
SELENOH	5.8179e-50	0.386598	0.974	0.801	1.10988e-45	upregulated
BIRC5	6.35462e-50	0.420887	0.599	0.238	1.21227e-45	upregulated
NANS	6.53107e-50	0.284881	0.647	0.271	1.24593e-45	upregulated
GMFG	8.88601e-50	-0.310805	0.991	0.994	1.69518e-45	downregulated
PLEKHO1	9.56666e-50	0.322277	0.704	0.318	1.82503e-45	upregulated
KDELR1	1.3307e-49	0.330038	0.817	0.453	2.53857e-45	upregulated
SEPT7	1.78268e-49	-0.33715	0.98	0.977	3.40081e-45	downregulated
MCM7	1.80609e-49	0.425837	0.71	0.319	3.44548e-45	upregulated
CD37	2.19275e-49	-0.465366	0.928	0.943	4.18311e-45	downregulated
ATP5G2	2.60072e-49	-0.299582	0.996	0.996	4.9614e-45	downregulated
RAB10	4.53049e-49	0.289896	0.693	0.307	8.64282e-45	upregulated
CARS	4.90143e-49	0.305279	0.675	0.281	9.35045e-45	upregulated
YPEL5	5.16096e-49	-0.534572	0.373	0.632	9.84556e-45	downregulated
ATP5G3	5.98066e-49	0.334604	0.994	0.954	1.14093e-44	upregulated
MRPL18	6.93237e-49	0.344652	0.81	0.472	1.32249e-44	upregulated
MXD3	1.30322e-48	0.295441	0.392	0.107	2.48614e-44	upregulated
FDPS	2.01491e-48	0.4101	0.896	0.647	3.84384e-44	upregulated
MRPL13	2.32906e-48	0.346054	0.845	0.488	4.44314e-44	upregulated
TCF25	2.94112e-48	-0.523782	0.802	0.863	5.61078e-44	downregulated
KPNA2	3.75953e-48	0.625182	0.649	0.315	7.17206e-44	upregulated
MOB3A	4.20923e-48	0.259668	0.621	0.235	8.02994e-44	upregulated
LPGAT1	4.85085e-48	0.301773	0.747	0.35	9.25397e-44	upregulated
CD3E	5.26421e-48	-0.357144	0.993	0.993	1.00425e-43	downregulated
PSMA7	8.12591e-48	0.328316	0.994	0.964	1.55018e-43	upregulated
NR4A2	8.57529e-48	-0.538579	0.057	0.382	1.63591e-43	downregulated
COX7C	9.97069e-48	-0.265509	0.998	0.995	1.90211e-43	downregulated
RPL27A	1.10742e-47	0.274834	1	0.998	2.11262e-43	upregulated
SNRNP25	1.6674e-47	0.325672	0.721	0.36	3.18089e-43	upregulated
RNASEH2C	1.74138e-47	0.364906	0.902	0.591	3.32203e-43	upregulated
PHF19	2.04226e-47	0.377455	0.776	0.41	3.89603e-43	upregulated
RNASEH2A	2.22648e-47	0.288807	0.595	0.234	4.24746e-43	upregulated
PRELID1	2.26848e-47	0.376137	0.97	0.864	4.32758e-43	upregulated
WHAMM	3.72181e-47	-0.490882	0.253	0.55	7.10009e-43	downregulated
NPC2	4.01289e-47	0.313272	0.656	0.283	7.65539e-43	upregulated
AAK1	6.30207e-47	-0.441127	0.734	0.831	1.20225e-42	downregulated
RBX1	1.12114e-46	0.310707	0.978	0.847	2.13879e-42	upregulated
ORC6	1.32957e-46	0.259371	0.532	0.19	2.53641e-42	upregulated
S1PR4	1.5237e-46	0.43124	0.97	0.781	2.90676e-42	upregulated
MDM4	1.99773e-46	-0.491757	0.471	0.671	3.81108e-42	downregulated
ZDHHC12	2.38701e-46	0.34785	0.767	0.414	4.55369e-42	upregulated
SUB1	2.39558e-46	-0.30695	0.993	0.998	4.57005e-42	downregulated
UBE2M	2.45747e-46	0.329701	0.896	0.62	4.68812e-42	upregulated
MT2A	3.19046e-46	-0.643428	0.895	0.901	6.08644e-42	downregulated
EIF4E	3.27617e-46	0.271376	0.741	0.349	6.24996e-42	upregulated
ITGB7	3.28917e-46	0.360051	0.911	0.589	6.27475e-42	upregulated
GINS2	3.37789e-46	0.350142	0.536	0.207	6.444e-42	upregulated
MTCH2	3.64001e-46	0.317707	0.771	0.42	6.94405e-42	upregulated
CHEK1	8.76317e-46	0.276407	0.625	0.25	1.67175e-41	upregulated
RRP7A	8.94773e-46	0.364335	0.713	0.363	1.70696e-41	upregulated
HSPE1	9.69669e-46	0.512924	0.932	0.74	1.84984e-41	upregulated
ACAT2	1.12506e-45	0.35821	0.704	0.366	2.14629e-41	upregulated
NAP1L1	1.59315e-45	0.370743	0.98	0.901	3.03926e-41	upregulated
ARGLU1	1.64935e-45	-0.424931	0.824	0.87	3.14647e-41	downregulated
MRPL20	1.86639e-45	0.373551	0.911	0.626	3.56052e-41	upregulated
NOP56	1.91704e-45	0.407849	0.823	0.489	3.65713e-41	upregulated
MZT2A	1.92356e-45	0.338317	0.989	0.869	3.66958e-41	upregulated
MLEC	2.58625e-45	0.324477	0.784	0.43	4.93378e-41	upregulated
HNRNPD	2.82322e-45	0.347391	0.985	0.825	5.38585e-41	upregulated
PDE7A	4.16694e-45	0.272808	0.651	0.28	7.94926e-41	upregulated
SINHCAF	4.4611e-45	0.281086	0.706	0.336	8.51044e-41	upregulated
RBM38	4.53948e-45	-0.484131	0.442	0.661	8.65997e-41	downregulated
TMEM106C	4.71799e-45	0.338	0.662	0.31	9.00051e-41	upregulated
VDAC3	5.13376e-45	0.354601	0.908	0.653	9.79367e-41	upregulated
CCT2	5.57985e-45	0.397999	0.871	0.567	1.06447e-40	upregulated
AIF1	7.2221e-45	0.366702	0.85	0.488	1.37776e-40	upregulated
CHMP5	7.76687e-45	0.330981	0.806	0.45	1.48169e-40	upregulated
MAP2K1	9.00784e-45	0.250312	0.645	0.277	1.71842e-40	upregulated
PRMT1	1.29233e-44	0.430233	0.858	0.566	2.46538e-40	upregulated
NDUFAF3	1.43813e-44	0.3394	0.841	0.513	2.74352e-40	upregulated
HAX1	1.72057e-44	0.301828	0.852	0.519	3.28232e-40	upregulated
COA4	1.89273e-44	0.308501	0.769	0.402	3.61075e-40	upregulated
NUDC	2.16905e-44	0.384729	0.88	0.593	4.1379e-40	upregulated
CD320	2.90207e-44	0.294065	0.638	0.284	5.53627e-40	upregulated
CASP8	5.2572e-44	-0.477376	0.612	0.746	1.00292e-39	downregulated
RPS10	5.51717e-44	-0.254706	1	1	1.05251e-39	downregulated
APMAP	6.12549e-44	-0.467023	0.471	0.653	1.16856e-39	downregulated
FDXR	7.20099e-44	0.269416	0.442	0.147	1.37373e-39	upregulated
PFKP	7.20188e-44	0.326176	0.743	0.385	1.3739e-39	upregulated
CKAP5	7.47235e-44	0.250051	0.497	0.176	1.4255e-39	upregulated
DTHD1	8.68976e-44	-0.345907	0.002	0.289	1.65775e-39	downregulated
CASP4	8.99074e-44	-0.440724	0.754	0.835	1.71516e-39	downregulated
ZNRD1	9.02991e-44	0.306426	0.861	0.491	1.72264e-39	upregulated
AKAP13	1.05968e-43	-0.476363	0.749	0.831	2.02156e-39	downregulated
MRPL36	1.12352e-43	0.308396	0.776	0.418	2.14334e-39	upregulated
IMP3	2.08232e-43	0.309001	0.841	0.497	3.97245e-39	upregulated
KRT10	2.60562e-43	-0.399082	0.847	0.887	4.97075e-39	downregulated
MIR4435-2HG	2.81361e-43	-0.497696	0.575	0.716	5.36752e-39	downregulated
CCDC85B	3.03586e-43	0.385542	0.965	0.839	5.7915e-39	upregulated
CCL3	3.05393e-43	-0.353096	0.083	0.406	5.82598e-39	downregulated
RFC4	3.78453e-43	0.269094	0.632	0.272	7.21974e-39	upregulated
ARAP2	4.70452e-43	-0.485342	0.323	0.573	8.97481e-39	downregulated
NIFK	4.94967e-43	0.31222	0.743	0.396	9.44248e-39	upregulated
PTMA	5.03795e-43	0.321536	1	0.999	9.61089e-39	upregulated
BIN2	5.72764e-43	-0.442831	0.85	0.894	1.09266e-38	downregulated
COX17	7.98392e-43	0.342034	0.86	0.548	1.52309e-38	upregulated
GMNN	8.01571e-43	0.303995	0.713	0.332	1.52916e-38	upregulated
MALSU1	8.32547e-43	0.250028	0.612	0.268	1.58825e-38	upregulated
EIF4A3	1.05066e-42	0.322578	0.747	0.393	2.00434e-38	upregulated
ELOC	1.47524e-42	0.330582	0.939	0.711	2.81431e-38	upregulated
EEF1D	1.89245e-42	-0.26831	0.998	0.995	3.61022e-38	downregulated
EEF1B2	1.91256e-42	0.309279	1	0.982	3.64859e-38	upregulated
TIMM10	1.96147e-42	0.307517	0.734	0.383	3.7419e-38	upregulated
MSI2	1.96787e-42	0.319318	0.767	0.386	3.75411e-38	upregulated
PTGES3	2.43414e-42	0.372839	0.948	0.801	4.64361e-38	upregulated
TKT	2.76653e-42	0.34904	0.952	0.737	5.27771e-38	upregulated
MYO1F	4.62395e-42	-0.446549	0.75	0.808	8.82112e-38	downregulated
S1PR5	4.7102e-42	-0.446509	0.004	0.281	8.98565e-38	downregulated
PIK3CD	4.79201e-42	0.275462	0.691	0.314	9.14171e-38	upregulated
KNL1	5.29456e-42	0.326845	0.492	0.185	1.01004e-37	upregulated
CBLB	5.36557e-42	-0.524007	0.427	0.633	1.02359e-37	downregulated
COPS9	5.44161e-42	-0.31806	0.906	0.91	1.0381e-37	downregulated
FAM207A	5.81716e-42	0.292479	0.778	0.409	1.10974e-37	upregulated
SIT1	7.66262e-42	0.370616	0.946	0.733	1.4618e-37	upregulated
UQCRH	8.96361e-42	0.271148	0.991	0.957	1.70999e-37	upregulated
RPL31	1.31967e-41	-0.292237	0.985	0.996	2.51754e-37	downregulated
ARHGEF1	1.58275e-41	-0.419269	0.824	0.847	3.01941e-37	downregulated
COTL1	1.63389e-41	0.32999	0.993	0.928	3.11698e-37	upregulated
NCAPD2	1.76418e-41	0.265777	0.603	0.263	3.36553e-37	upregulated
ACADVL	3.16544e-41	0.301696	0.795	0.444	6.03871e-37	upregulated
DCAF7	3.34934e-41	0.299639	0.721	0.367	6.38953e-37	upregulated
ITGA4	4.4025e-41	-0.478227	0.823	0.87	8.39864e-37	downregulated
NSD2	4.60677e-41	0.261996	0.569	0.238	8.78834e-37	upregulated
COA6	5.66227e-41	0.290524	0.767	0.422	1.08019e-36	upregulated
CHCHD1	6.71048e-41	0.325551	0.885	0.585	1.28016e-36	upregulated
ATF7IP2	1.08305e-40	-0.462723	0.305	0.552	2.06613e-36	downregulated
EIF1	1.19427e-40	-0.261751	0.998	1	2.27832e-36	downregulated
HMGB3	1.24201e-40	0.281161	0.606	0.27	2.36938e-36	upregulated
CISD2	2.1632e-40	0.298517	0.769	0.429	4.12675e-36	upregulated
PPIF	2.21387e-40	0.298416	0.643	0.305	4.2234e-36	upregulated
AURKAIP1	2.34793e-40	0.311621	0.956	0.826	4.47914e-36	upregulated
H2AFY	2.37598e-40	0.343816	0.933	0.715	4.53266e-36	upregulated
FANCI	2.83721e-40	0.268824	0.534	0.216	5.41254e-36	upregulated
GSTP1	4.54326e-40	0.411422	0.959	0.912	8.66717e-36	upregulated
PPP1R35	4.70662e-40	0.254576	0.738	0.364	8.97882e-36	upregulated
CHI3L2	5.55897e-40	-0.481415	0.098	0.385	1.06049e-35	downregulated
FAM111B	6.12755e-40	0.283308	0.37	0.115	1.16895e-35	upregulated
WIPF1	6.59614e-40	-0.371313	0.856	0.881	1.25835e-35	downregulated
LMNB1	8.41937e-40	0.333352	0.697	0.365	1.60616e-35	upregulated
CCT3	1.0948e-39	0.356876	0.913	0.726	2.08855e-35	upregulated
LCP2	1.10884e-39	0.310712	0.915	0.629	2.11533e-35	upregulated
RBM17	2.02542e-39	0.348832	0.869	0.592	3.86389e-35	upregulated
PCBP1	2.13936e-39	0.284972	0.991	0.915	4.08125e-35	upregulated
SLC25A5	2.68785e-39	0.325623	0.983	0.949	5.12761e-35	upregulated
SHMT2	4.64105e-39	0.283372	0.715	0.38	8.85373e-35	upregulated
CDC42SE2	6.07912e-39	-0.369915	0.867	0.897	1.15971e-34	downregulated
ANP32E	8.17149e-39	0.404717	0.9	0.68	1.55887e-34	upregulated
SAMD3	1.05497e-38	-0.418467	0.701	0.828	2.01256e-34	downregulated
NCAPD3	1.15244e-38	0.255625	0.542	0.225	2.1985e-34	upregulated
CD74	1.48481e-38	-0.375756	0.982	0.982	2.83256e-34	downregulated
BATF	1.52284e-38	0.293985	0.701	0.343	2.90512e-34	upregulated
MRPS15	1.74442e-38	0.3027	0.922	0.708	3.32783e-34	upregulated
MCM3	2.05746e-38	0.322026	0.697	0.35	3.92502e-34	upregulated
S100A6	2.41842e-38	-0.291852	1	1	4.61362e-34	downregulated
FAM96B	4.56775e-38	0.294078	0.956	0.802	8.7139e-34	upregulated
ASCL2	5.11138e-38	-0.417254	0.007	0.264	9.75099e-34	downregulated
RPS17	5.20958e-38	0.343819	0.994	0.979	9.93831e-34	upregulated
TAGLN2	6.9517e-38	0.303556	0.978	0.86	1.32618e-33	upregulated
DKC1	1.23857e-37	0.274853	0.617	0.294	2.36283e-33	upregulated
TXNRD1	1.56142e-37	0.273735	0.636	0.309	2.97872e-33	upregulated
PPM1K	2.38396e-37	0.265375	0.625	0.278	4.54787e-33	upregulated
RSL24D1	2.85015e-37	-0.349677	0.882	0.888	5.43723e-33	downregulated
CAB39	2.85688e-37	0.26672	0.736	0.39	5.45006e-33	upregulated
CFLAR	4.30208e-37	-0.405279	0.754	0.821	8.20707e-33	downregulated
SSR3	4.30575e-37	0.295076	0.926	0.687	8.21408e-33	upregulated
CCDC47	4.43949e-37	0.255519	0.667	0.327	8.46921e-33	upregulated
CYB5B	5.62845e-37	0.270574	0.767	0.434	1.07374e-32	upregulated
IFI27L2	5.81125e-37	-0.356604	0.867	0.862	1.10861e-32	downregulated
FKBP2	6.25264e-37	0.320813	0.834	0.504	1.19282e-32	upregulated
CLPP	6.30906e-37	0.292404	0.895	0.62	1.20358e-32	upregulated
BICDL1	8.21379e-37	-0.400587	0.166	0.433	1.56694e-32	downregulated
STK17A	1.06975e-36	-0.413571	0.815	0.835	2.04076e-32	downregulated
ARF4	1.46153e-36	0.285636	0.763	0.427	2.78815e-32	upregulated
BTG1	1.60316e-36	-0.350371	0.969	0.983	3.05836e-32	downregulated
PCSK7	1.98985e-36	-0.474327	0.664	0.773	3.79603e-32	downregulated
PIP4K2A	2.60502e-36	-0.400009	0.726	0.774	4.96959e-32	downregulated
RPA1	3.80045e-36	0.256697	0.71	0.363	7.25012e-32	upregulated
MX1	3.87922e-36	0.407351	0.61	0.318	7.40038e-32	upregulated
USP14	3.9496e-36	0.26539	0.695	0.366	7.53466e-32	upregulated
ZBTB38	3.97109e-36	-0.469787	0.307	0.539	7.57565e-32	downregulated
ARL6IP5	4.81463e-36	0.311639	0.987	0.946	9.18486e-32	upregulated
MSN	5.41022e-36	-0.306834	0.967	0.972	1.03211e-31	downregulated
SERBP1	6.96701e-36	0.324543	0.982	0.88	1.3291e-31	upregulated
HSBP1	7.09979e-36	0.27405	0.85	0.515	1.35443e-31	upregulated
BHLHE40	7.99631e-36	0.330551	0.889	0.604	1.52546e-31	upregulated
CD52	8.61786e-36	-0.28859	0.993	1	1.64403e-31	downregulated
APBB1IP	9.01425e-36	-0.403152	0.799	0.805	1.71965e-31	downregulated
LSP1	9.41695e-36	-0.326411	0.963	0.968	1.79647e-31	downregulated
HK1	1.21705e-35	0.254168	0.645	0.314	2.32176e-31	upregulated
RNF149	1.26019e-35	0.26447	0.739	0.371	2.40407e-31	upregulated
UQCC2	1.27523e-35	0.289953	0.765	0.453	2.43275e-31	upregulated
NDUFA1	1.61029e-35	-0.283267	0.967	0.958	3.07196e-31	downregulated
SH2D1A	2.40704e-35	-0.389551	0.806	0.823	4.59191e-31	downregulated
SKAP1	2.58674e-35	-0.387428	0.834	0.87	4.93473e-31	downregulated
SYF2	3.44067e-35	-0.37984	0.871	0.865	6.56376e-31	downregulated
ERH	4.01961e-35	0.281333	0.959	0.829	7.6682e-31	upregulated
COX5A	4.23836e-35	0.26707	0.982	0.884	8.08553e-31	upregulated
HIST1H1B	5.86787e-35	0.551655	0.492	0.227	1.11941e-30	upregulated
RGS19	7.37462e-35	0.275176	0.891	0.594	1.40686e-30	upregulated
PSMC2	7.64325e-35	0.264469	0.767	0.438	1.4581e-30	upregulated
TRA2A	1.35622e-34	-0.436226	0.603	0.688	2.58725e-30	downregulated
SH3BP5	1.81489e-34	0.316068	0.745	0.433	3.46226e-30	upregulated
TOMM40	2.07852e-34	0.315088	0.671	0.361	3.96518e-30	upregulated
HSP90AA1	2.20766e-34	0.421892	0.998	0.988	4.21155e-30	upregulated
PSMD1	2.97338e-34	0.29619	0.78	0.464	5.67232e-30	upregulated
HLA-DRB1	3.02276e-34	-0.356778	0.706	0.873	5.76652e-30	downregulated
RAP1B	3.59051e-34	-0.313652	0.959	0.949	6.84962e-30	downregulated
DOCK8	4.30609e-34	0.278783	0.921	0.626	8.21474e-30	upregulated
NCOA1	4.84758e-34	-0.40904	0.22	0.46	9.24772e-30	downregulated
EIF4G1	5.3736e-34	0.293959	0.612	0.315	1.02512e-29	upregulated
HLA-F	6.17335e-34	-0.374506	0.921	0.932	1.17769e-29	downregulated
LAMTOR5	6.26147e-34	0.268847	0.952	0.792	1.1945e-29	upregulated
EIF3F	6.45487e-34	-0.313205	0.976	0.976	1.2314e-29	downregulated
ATP5J	8.08258e-34	0.259208	0.974	0.895	1.54191e-29	upregulated
IMMT	1.04876e-33	0.255971	0.793	0.467	2.00071e-29	upregulated
TCP1	1.09192e-33	0.33465	0.804	0.516	2.08306e-29	upregulated
EIF2S2	1.4114e-33	0.293068	0.935	0.762	2.69253e-29	upregulated
SIVA1	1.61475e-33	0.354607	0.834	0.64	3.08046e-29	upregulated
TAPBP	2.74586e-33	-0.339837	0.898	0.91	5.23829e-29	downregulated
TESC	2.94168e-33	0.34043	0.793	0.489	5.61185e-29	upregulated
SH3BGRL	4.79968e-33	-0.350747	0.856	0.858	9.15635e-29	downregulated
DNPH1	4.83812e-33	0.271278	0.808	0.47	9.22968e-29	upregulated
MGAT4A	4.88339e-33	-0.45694	0.567	0.684	9.31604e-29	downregulated
MZT2B	4.88618e-33	0.255401	0.994	0.961	9.32137e-29	upregulated
SNHG9	5.26498e-33	-0.37766	0.196	0.438	1.0044e-28	downregulated
GIMAP1	7.4747e-33	0.344212	0.86	0.561	1.42595e-28	upregulated
MRPL41	8.97727e-33	0.278452	0.937	0.784	1.71259e-28	upregulated
SAT1	9.81958e-33	-0.387141	0.843	0.861	1.87328e-28	downregulated
MDH1	9.90131e-33	0.272293	0.937	0.731	1.88887e-28	upregulated
CBX5	1.08455e-32	0.279815	0.787	0.461	2.069e-28	upregulated
REXO2	1.43376e-32	0.283954	0.789	0.484	2.73518e-28	upregulated
MCM6	1.47389e-32	0.271856	0.591	0.28	2.81174e-28	upregulated
MESD	1.93187e-32	0.28418	0.83	0.526	3.68542e-28	upregulated
PHPT1	2.06234e-32	0.351132	0.913	0.689	3.93432e-28	upregulated
ATAD2	2.08946e-32	0.306259	0.632	0.33	3.98607e-28	upregulated
MTDH	2.33726e-32	0.288264	0.972	0.863	4.4588e-28	upregulated
PAXX	2.40706e-32	-0.377591	0.837	0.844	4.59195e-28	downregulated
HIGD2A	2.44676e-32	-0.325253	0.945	0.952	4.66768e-28	downregulated
CDK2AP2	2.98041e-32	0.294453	0.911	0.644	5.68573e-28	upregulated
TXNDC17	3.63753e-32	0.287146	0.917	0.703	6.93932e-28	upregulated
NSMCE1	4.09265e-32	0.276274	0.832	0.509	7.80756e-28	upregulated
NDUFB9	5.67953e-32	-0.308637	0.924	0.903	1.08348e-27	downregulated
ATP6V0B	6.00917e-32	0.277231	0.921	0.758	1.14637e-27	upregulated
PDCD5	6.58088e-32	0.296111	0.917	0.685	1.25543e-27	upregulated
P4HB	6.87277e-32	0.267767	0.943	0.809	1.31112e-27	upregulated
CNOT1	7.43942e-32	-0.39909	0.547	0.648	1.41922e-27	downregulated
UBB	8.60959e-32	-0.278391	0.994	0.995	1.64245e-27	downregulated
PCIF1	9.60626e-32	-0.405061	0.303	0.498	1.83259e-27	downregulated
UCP2	1.09426e-31	-0.39735	0.945	0.948	2.08752e-27	downregulated
EIF1AY	1.28672e-31	0.300112	0.856	0.582	2.45468e-27	upregulated
LMAN1	1.34099e-31	0.295984	0.874	0.605	2.55821e-27	upregulated
UBALD2	1.59291e-31	0.37551	0.982	0.85	3.03879e-27	upregulated
EIF5A	2.0947e-31	0.323938	0.976	0.886	3.99607e-27	upregulated
SON	2.11397e-31	-0.313448	0.924	0.932	4.03281e-27	downregulated
CELF2	2.26929e-31	-0.408904	0.823	0.858	4.32912e-27	downregulated
MED10	2.32447e-31	-0.304209	0.823	0.835	4.43439e-27	downregulated
UBXN4	2.48184e-31	0.270553	0.945	0.731	4.73461e-27	upregulated
TLN1	2.80311e-31	-0.340406	0.898	0.903	5.3475e-27	downregulated
STOML2	3.37475e-31	0.279069	0.848	0.606	6.43801e-27	upregulated
PTMS	4.04833e-31	-0.6101	0.506	0.666	7.72301e-27	downregulated
MIB2	4.06017e-31	-0.408665	0.266	0.48	7.74559e-27	downregulated
MRPS34	4.22019e-31	0.297359	0.919	0.697	8.05087e-27	upregulated
TANK	5.28402e-31	0.258798	0.776	0.438	1.00803e-26	upregulated
B4GALT1	7.62559e-31	-0.430986	0.397	0.564	1.45473e-26	downregulated
MRPL37	7.65428e-31	0.255119	0.765	0.447	1.46021e-26	upregulated
PARP8	7.76355e-31	-0.397521	0.364	0.558	1.48105e-26	downregulated
HSP90AB1	1.03492e-30	0.5037	0.98	0.9	1.97432e-26	upregulated
TRADD	1.06265e-30	0.284153	0.878	0.577	2.02721e-26	upregulated
MRPS33	1.30423e-30	0.256885	0.778	0.464	2.48808e-26	upregulated
HIST1H4C	1.34055e-30	0.913447	0.874	0.729	2.55736e-26	upregulated
MGEA5	1.44996e-30	-0.389523	0.599	0.691	2.76608e-26	downregulated
CCT7	1.87637e-30	0.299091	0.871	0.686	3.57955e-26	upregulated
TSPO	1.92428e-30	-0.314257	0.946	0.943	3.67094e-26	downregulated
LYZ	2.13043e-30	-0.45798	0.004	0.215	4.06422e-26	downregulated
PSMA3	2.34136e-30	0.299394	0.915	0.751	4.46661e-26	upregulated
NDUFA3	2.46563e-30	-0.332747	0.837	0.833	4.70368e-26	downregulated
GADD45GIP1	2.54535e-30	0.29765	0.922	0.695	4.85576e-26	upregulated
EIF3G	2.72556e-30	-0.303856	0.974	0.961	5.19955e-26	downregulated
PRDX5	2.87004e-30	0.255559	0.963	0.795	5.47518e-26	upregulated
LBR	3.11869e-30	0.32699	0.83	0.606	5.94952e-26	upregulated
SSRP1	3.28977e-30	0.273484	0.791	0.471	6.2759e-26	upregulated
ATP5F1	3.44361e-30	0.25785	0.965	0.808	6.56937e-26	upregulated
PPA1	3.5071e-30	0.307434	0.908	0.679	6.69049e-26	upregulated
UBE2N	3.66367e-30	0.262344	0.911	0.72	6.98919e-26	upregulated
UFC1	4.08112e-30	-0.294375	0.922	0.923	7.78556e-26	downregulated
CNOT6L	4.15229e-30	-0.430037	0.499	0.64	7.92133e-26	downregulated
MRPL16	4.90746e-30	0.251496	0.81	0.52	9.36196e-26	upregulated
CNPY2	4.93657e-30	0.257098	0.841	0.567	9.4175e-26	upregulated
CENPX	5.65483e-30	0.268831	0.774	0.471	1.07877e-25	upregulated
SMCHD1	6.78119e-30	-0.376897	0.786	0.828	1.29365e-25	downregulated
HMGA1	8.52698e-30	0.358778	0.867	0.682	1.62669e-25	upregulated
SYNE2	1.01732e-29	-0.405816	0.738	0.833	1.94074e-25	downregulated
C4orf3	1.12742e-29	0.442823	0.956	0.85	2.15078e-25	upregulated
PFDN2	1.19381e-29	0.268624	0.909	0.672	2.27744e-25	upregulated
CD8A	1.19775e-29	-0.271711	1	1	2.28495e-25	downregulated
EPB41	1.66886e-29	-0.434236	0.505	0.629	3.18369e-25	downregulated
KPNB1	1.7284e-29	0.317301	0.854	0.627	3.29728e-25	upregulated
TNFRSF14	2.01254e-29	-0.44147	0.689	0.739	3.83932e-25	downregulated
ZBTB1	2.14862e-29	-0.428212	0.407	0.571	4.09891e-25	downregulated
PRR5L	2.57229e-29	-0.254653	0.02	0.233	4.90716e-25	downregulated
SNRPD1	3.7905e-29	0.28801	0.948	0.819	7.23113e-25	upregulated
ITGAL	4.47842e-29	-0.400226	0.765	0.81	8.54348e-25	downregulated
TNFRSF9	5.40172e-29	-0.336573	0.078	0.306	1.03049e-24	downregulated
CTSS	5.43088e-29	-0.35514	0.695	0.759	1.03605e-24	downregulated
RAP1GAP2	6.11369e-29	-0.335921	0.12	0.348	1.16631e-24	downregulated
PGP	8.7153e-29	0.260894	0.726	0.444	1.66262e-24	upregulated
HLA-DRB5	1.01257e-28	-0.399703	0.076	0.329	1.93169e-24	downregulated
DNMT1	1.09026e-28	0.272685	0.826	0.511	2.0799e-24	upregulated
PSMD11	1.2485e-28	0.263944	0.799	0.514	2.38177e-24	upregulated
PRR5	1.407e-28	-0.426264	0.421	0.578	2.68413e-24	downregulated
PSMB2	1.88097e-28	0.261316	0.95	0.81	3.58833e-24	upregulated
CARD16	2.03005e-28	-0.357811	0.797	0.801	3.87273e-24	downregulated
APOBEC3C	2.48797e-28	-0.350988	0.799	0.808	4.74629e-24	downregulated
BIN1	2.74123e-28	-0.360868	0.815	0.84	5.22945e-24	downregulated
SYNCRIP	3.14909e-28	0.279368	0.837	0.537	6.00752e-24	upregulated
JAK1	3.63762e-28	-0.316964	0.924	0.904	6.93949e-24	downregulated
VPS37B	4.30101e-28	-0.397083	0.353	0.524	8.20504e-24	downregulated
CLK1	7.23744e-28	-0.432627	0.464	0.6	1.38069e-23	downregulated
SPON2	7.343e-28	-0.453596	0.111	0.329	1.40082e-23	downregulated
JPT1	1.32376e-27	0.334726	0.943	0.821	2.52533e-23	upregulated
NFKBIZ	1.571e-27	-0.433942	0.335	0.518	2.99699e-23	downregulated
BANF1	1.61103e-27	0.252987	0.876	0.644	3.07335e-23	upregulated
KIF20B	1.6516e-27	0.346017	0.621	0.357	3.15076e-23	upregulated
ALYREF	1.67995e-27	0.282266	0.824	0.574	3.20483e-23	upregulated
TACC3	1.70965e-27	0.25905	0.591	0.315	3.26151e-23	upregulated
ADAP1	1.76273e-27	-0.254049	0.065	0.283	3.36275e-23	downregulated
TOX	2.55284e-27	-0.330205	0.087	0.306	4.87005e-23	downregulated
ILK	3.23914e-27	0.253157	0.841	0.531	6.17931e-23	upregulated
HNRNPDL	3.65548e-27	-0.306435	0.954	0.952	6.97357e-23	downregulated
PHB	4.11936e-27	0.266545	0.884	0.629	7.85851e-23	upregulated
HNRNPH1	5.72994e-27	-0.363169	0.878	0.87	1.0931e-22	downregulated
SSB	7.42896e-27	0.273477	0.884	0.657	1.41722e-22	upregulated
REL	8.37421e-27	-0.424371	0.471	0.59	1.59755e-22	downregulated
RPS19	8.37819e-27	0.25384	1	1	1.59831e-22	upregulated
DECR1	9.43991e-27	-0.325566	0.789	0.764	1.80085e-22	downregulated
ARF5	9.86477e-27	-0.307084	0.78	0.785	1.8819e-22	downregulated
CEBPD	1.05532e-26	-0.255669	0.02	0.218	2.01323e-22	downregulated
GSTO1	1.08591e-26	0.260673	0.917	0.733	2.07159e-22	upregulated
TIMD4	1.16372e-26	-0.454512	0.259	0.468	2.22002e-22	downregulated
PTTG1	1.34254e-26	0.41209	0.728	0.481	2.56116e-22	upregulated
CD82	2.25136e-26	0.261126	0.695	0.387	4.29492e-22	upregulated
RICTOR	2.57522e-26	-0.395471	0.49	0.609	4.91275e-22	downregulated
SLAMF6	3.08323e-26	-0.344806	0.214	0.416	5.88187e-22	downregulated
ARHGAP9	3.37023e-26	-0.360455	0.499	0.616	6.42939e-22	downregulated
PRPF4B	3.37795e-26	-0.387396	0.675	0.716	6.44411e-22	downregulated
SRSF2	3.52486e-26	0.270365	0.945	0.818	6.72438e-22	upregulated
RNF213	7.97902e-26	-0.305992	0.913	0.943	1.52216e-21	downregulated
FDFT1	9.48215e-26	0.259611	0.795	0.558	1.80891e-21	upregulated
KRTCAP2	2.11656e-25	-0.288472	0.821	0.828	4.03776e-21	downregulated
BST2	3.05055e-25	0.27729	0.945	0.776	5.81953e-21	upregulated
CYTIP	3.84037e-25	0.251873	0.952	0.744	7.32628e-21	upregulated
LIM2	4.29242e-25	-0.466157	0.004	0.181	8.18865e-21	downregulated
TCF7	5.10829e-25	-0.303245	0.139	0.355	9.74508e-21	downregulated
EMB	7.09216e-25	-0.35739	0.802	0.824	1.35297e-20	downregulated
LINC01871	1.80785e-24	0.318551	0.826	0.535	3.44883e-20	upregulated
METRN	2.14864e-24	-0.299969	0.129	0.335	4.09896e-20	downregulated
RPL36A	5.16479e-24	-0.282127	0.961	0.951	9.85287e-20	downregulated
CCT6A	6.2712e-24	0.303867	0.843	0.613	1.19636e-19	upregulated
PTPN7	6.51634e-24	0.26765	0.865	0.609	1.24312e-19	upregulated
FBXO3	6.95678e-24	-0.33632	0.224	0.415	1.32715e-19	downregulated
RASAL3	8.09549e-24	-0.358348	0.553	0.645	1.54438e-19	downregulated
TMX4	8.53729e-24	-0.375511	0.462	0.585	1.62866e-19	downregulated
SERPINB1	8.89227e-24	-0.345796	0.852	0.811	1.69638e-19	downregulated
FAM46C	1.61033e-23	-0.397086	0.281	0.456	3.07202e-19	downregulated
FAM133B	1.63329e-23	-0.364307	0.771	0.758	3.11583e-19	downregulated
SF1	1.78721e-23	-0.271622	0.893	0.881	3.40946e-19	downregulated
YPEL3	2.85518e-23	-0.377729	0.628	0.722	5.44683e-19	downregulated
H2AFV	4.05164e-23	0.26415	0.963	0.826	7.7293e-19	upregulated
LBH	4.87841e-23	-0.377242	0.558	0.66	9.30655e-19	downregulated
ZNF428	5.34855e-23	-0.343064	0.519	0.609	1.02034e-18	downregulated
PIK3IP1	5.79856e-23	-0.336749	0.168	0.362	1.10619e-18	downregulated
SLAMF7	1.31072e-22	-0.340288	0.299	0.484	2.50046e-18	downregulated
DAZAP2	1.44838e-22	-0.282055	0.896	0.877	2.76307e-18	downregulated
SSBP4	1.61399e-22	-0.289196	0.83	0.841	3.07901e-18	downregulated
C1orf56	1.65318e-22	-0.484621	0.545	0.661	3.15377e-18	downregulated
C5orf56	1.76639e-22	-0.370604	0.534	0.628	3.36975e-18	downregulated
TIMM13	2.2654e-22	0.263155	0.828	0.593	4.32171e-18	upregulated
ELF2	2.76526e-22	-0.323243	0.403	0.535	5.27528e-18	downregulated
SLC25A4	4.23213e-22	-0.303017	0.133	0.321	8.07364e-18	downregulated
PEBP1	4.71534e-22	0.256162	0.856	0.666	8.99546e-18	upregulated
HLA-DPA1	4.94567e-22	-0.304256	0.745	0.826	9.43485e-18	downregulated
ATP5G1	5.11218e-22	0.250468	0.863	0.642	9.7525e-18	upregulated
KLF6	8.413e-22	-0.438756	0.83	0.836	1.60495e-17	downregulated
C16orf87	1.00143e-21	-0.313062	0.436	0.546	1.91042e-17	downregulated
RORA	1.36633e-21	-0.473428	0.521	0.596	2.60654e-17	downregulated
GIMAP7	1.6725e-21	0.364858	0.965	0.879	3.19064e-17	upregulated
RGS10	2.55333e-21	-0.268421	0.948	0.924	4.87099e-17	downregulated
SH3KBP1	2.62738e-21	-0.324413	0.723	0.727	5.01225e-17	downregulated
AHNAK	2.77202e-21	-0.351886	0.81	0.848	5.28819e-17	downregulated
SPN	2.88058e-21	0.251782	0.904	0.727	5.49528e-17	upregulated
SYTL1	3.02386e-21	-0.368589	0.508	0.625	5.76862e-17	downregulated
PRKCH	3.14344e-21	-0.307435	0.745	0.744	5.99673e-17	downregulated
OPTN	3.78885e-21	-0.294947	0.85	0.837	7.228e-17	downregulated
CYCS	4.0366e-21	0.266083	0.941	0.795	7.70062e-17	upregulated
CNN2	4.1838e-21	-0.282372	0.957	0.939	7.98143e-17	downregulated
SMC4	5.72537e-21	0.356118	0.73	0.568	1.09223e-16	upregulated
PREX1	8.34674e-21	-0.326444	0.654	0.692	1.59231e-16	downregulated
ELF1	1.6487e-20	-0.305941	0.852	0.838	3.14522e-16	downregulated
DGKZ	2.52713e-20	-0.30945	0.621	0.671	4.82101e-16	downregulated
IQGAP1	2.71884e-20	-0.267208	0.896	0.893	5.18672e-16	downregulated
DDX3X	2.78213e-20	-0.326228	0.701	0.715	5.30747e-16	downregulated
NLRC5	3.16332e-20	-0.319725	0.327	0.473	6.03467e-16	downregulated
VPS13C	5.62139e-20	-0.331469	0.508	0.609	1.07239e-15	downregulated
ZFP36	7.50932e-20	-0.495382	0.59	0.638	1.43255e-15	downregulated
MCRIP1	1.2075e-19	-0.291752	0.495	0.593	2.30355e-15	downregulated
SIPA1	1.28487e-19	-0.310384	0.551	0.618	2.45114e-15	downregulated
FNBP1	1.4617e-19	-0.309951	0.78	0.774	2.78849e-15	downregulated
KLHL24	1.77406e-19	-0.277139	0.135	0.316	3.38438e-15	downregulated
ERN1	2.04109e-19	-0.327506	0.333	0.489	3.89379e-15	downregulated
S100A12	2.04759e-19	-0.45937	0	0.136	3.90618e-15	downregulated
COG3	2.25655e-19	-0.301888	0.233	0.399	4.30483e-15	downregulated
CD70	4.24656e-19	0.418911	0.521	0.318	8.10116e-15	upregulated
CIR1	5.30967e-19	-0.317606	0.684	0.697	1.01293e-14	downregulated
LENG8	5.90535e-19	-0.305404	0.296	0.447	1.12656e-14	downregulated
LINC01089	5.95011e-19	-0.273522	0.15	0.323	1.1351e-14	downregulated
ARID4B	6.57981e-19	-0.293943	0.786	0.777	1.25523e-14	downregulated
F2R	7.02321e-19	-0.299419	0.196	0.362	1.33982e-14	downregulated
TFDP2	1.05664e-18	-0.320012	0.368	0.482	2.01576e-14	downregulated
HERPUD1	1.14776e-18	-0.342928	0.693	0.719	2.18957e-14	downregulated
EPS15	2.39135e-18	-0.315015	0.418	0.52	4.56197e-14	downregulated
TBX21	2.81393e-18	-0.29627	0.209	0.374	5.36813e-14	downregulated
CD69	3.42892e-18	-0.529542	0.843	0.833	6.54136e-14	downregulated
CYTH1	3.44895e-18	-0.318378	0.619	0.664	6.57955e-14	downregulated
PPP6R2	3.58311e-18	-0.369351	0.377	0.486	6.83551e-14	downregulated
PIM3	5.5229e-18	-0.400856	0.516	0.575	1.0536e-13	downregulated
RIOK3	7.49914e-18	-0.317228	0.59	0.64	1.43061e-13	downregulated
HLA-DQB1	7.70502e-18	0.45968	0.558	0.332	1.46989e-13	upregulated
FMNL1	8.18064e-18	-0.269068	0.856	0.841	1.56062e-13	downregulated
RAD21	8.82869e-18	0.311762	0.865	0.748	1.68425e-13	upregulated
PLA2G16	1.12152e-17	-0.314681	0.34	0.476	2.13952e-13	downregulated
JUNB	1.4791e-17	-0.349306	0.848	0.876	2.82168e-13	downregulated
TRAPPC10	1.93944e-17	-0.311156	0.416	0.507	3.69986e-13	downregulated
NSA2	1.99443e-17	-0.263991	0.893	0.885	3.80477e-13	downregulated
SPTAN1	2.20198e-17	-0.300945	0.604	0.653	4.20071e-13	downregulated
SUN2	2.33351e-17	-0.28588	0.765	0.775	4.45164e-13	downregulated
CCDC12	2.63432e-17	-0.250212	0.793	0.782	5.02548e-13	downregulated
MTERF4	4.19345e-17	-0.301049	0.429	0.515	7.99984e-13	downregulated
GK5	5.17242e-17	-0.328752	0.25	0.394	9.86742e-13	downregulated
FAM107B	5.36716e-17	-0.27293	0.887	0.874	1.02389e-12	downregulated
CAST	5.9501e-17	-0.281341	0.861	0.837	1.1351e-12	downregulated
CDC25B	6.87069e-17	0.252188	0.834	0.668	1.31072e-12	upregulated
OGT	7.10293e-17	-0.328953	0.545	0.59	1.35503e-12	downregulated
BCLAF1	9.01452e-17	-0.287407	0.756	0.766	1.7197e-12	downregulated
DNAJB6	1.04405e-16	-0.284619	0.697	0.691	1.99174e-12	downregulated
CXCR4	1.08222e-16	-0.31637	0.909	0.902	2.06456e-12	downregulated
DUSP1	1.19902e-16	-0.425766	0.397	0.533	2.28737e-12	downregulated
CEP78	1.27889e-16	-0.421755	0.423	0.502	2.43974e-12	downregulated
TRA2B	1.47711e-16	-0.298069	0.889	0.829	2.81788e-12	downregulated
TERF2IP	2.06211e-16	-0.260761	0.876	0.859	3.9339e-12	downregulated
ABTB1	2.40279e-16	-0.256034	0.152	0.306	4.5838e-12	downregulated
EPB41L4A-AS1	2.87079e-16	-0.290864	0.396	0.501	5.4766e-12	downregulated
PHACTR2	3.506e-16	-0.333086	0.366	0.473	6.6884e-12	downregulated
NCBP2-AS2	3.71638e-16	-0.254802	0.558	0.608	7.08975e-12	downregulated
CHD3	4.93305e-16	-0.294968	0.494	0.564	9.41079e-12	downregulated
SIGIRR	6.14202e-16	-0.288819	0.645	0.666	1.17171e-11	downregulated
NOP53	6.5951e-16	-0.255759	0.959	0.93	1.25815e-11	downregulated
HELZ	8.08848e-16	-0.30163	0.499	0.56	1.54304e-11	downregulated
TRANK1	8.55297e-16	-0.251446	0.207	0.361	1.63165e-11	downregulated
AC058791.1	8.8545e-16	-0.283661	0.231	0.367	1.68917e-11	downregulated
HPGD	1.05067e-15	0.256432	0.597	0.382	2.00437e-11	upregulated
RNF139	1.21168e-15	-0.270727	0.281	0.409	2.31151e-11	downregulated
MT1X	1.26703e-15	-0.266693	0.732	0.729	2.41711e-11	downregulated
CD2	1.4142e-15	-0.263678	0.957	0.94	2.69787e-11	downregulated
PTPRA	1.77649e-15	-0.320597	0.56	0.586	3.389e-11	downregulated
ATF7IP	4.31072e-15	-0.30597	0.421	0.52	8.22356e-11	downregulated
ZNF394	5.09761e-15	-0.318915	0.418	0.498	9.72471e-11	downregulated
TIPARP	9.12451e-15	-0.301781	0.314	0.432	1.74068e-10	downregulated
NKTR	9.17966e-15	-0.274115	0.743	0.735	1.7512e-10	downregulated
SNHG25	1.02002e-14	-0.273443	0.253	0.378	1.94588e-10	downregulated
MCL1	1.45175e-14	-0.274634	0.845	0.808	2.7695e-10	downregulated
BNIP3L	1.53108e-14	0.324147	0.61	0.456	2.92085e-10	upregulated
HMGB2	1.64597e-14	0.320994	0.926	0.941	3.14001e-10	upregulated
ARID1B	1.66735e-14	-0.276273	0.677	0.677	3.1808e-10	downregulated
DDX17	1.91967e-14	-0.257847	0.891	0.854	3.66216e-10	downregulated
KDM2A	2.0645e-14	-0.286707	0.551	0.589	3.93844e-10	downregulated
FAM173A	3.25111e-14	-0.251353	0.187	0.319	6.20215e-10	downregulated
GCC2	3.85309e-14	-0.323257	0.675	0.684	7.35054e-10	downregulated
TTC38	3.9304e-14	-0.29635	0.129	0.263	7.49803e-10	downregulated
KLRB1	5.16645e-14	-0.463164	0.028	0.145	9.85603e-10	downregulated
DNAJC1	7.32964e-14	-0.278648	0.593	0.613	1.39828e-09	downregulated
KLF3	7.6009e-14	-0.2929	0.165	0.306	1.45002e-09	downregulated
PTPN18	7.62003e-14	-0.293794	0.56	0.613	1.45367e-09	downregulated
RBM4	9.55036e-14	-0.268112	0.296	0.413	1.82192e-09	downregulated
N4BP2L1	1.23651e-13	-0.259015	0.312	0.427	2.3589e-09	downregulated
RNF220	1.26836e-13	-0.255975	0.342	0.441	2.41966e-09	downregulated
EHD1	1.28888e-13	-0.269103	0.481	0.546	2.45879e-09	downregulated
PXN	1.45718e-13	-0.264921	0.501	0.578	2.77987e-09	downregulated
USP28	2.05243e-13	-0.267386	0.301	0.411	3.91543e-09	downregulated
NCKAP1L	9.30256e-13	-0.262661	0.651	0.644	1.77465e-08	downregulated
KANSL1	1.20542e-12	-0.255131	0.652	0.647	2.29957e-08	downregulated
LGALS1	1.35964e-12	0.254679	0.989	0.971	2.59379e-08	upregulated
HACD4	1.68885e-12	-0.266912	0.536	0.569	3.22181e-08	downregulated
ZFAND2A	2.36487e-12	-0.261068	0.299	0.398	4.51146e-08	downregulated
PPP1R15A	2.39509e-12	-0.372556	0.558	0.589	4.56912e-08	downregulated
CBX4	2.65122e-12	-0.271604	0.325	0.418	5.05773e-08	downregulated
TTC14	3.30657e-12	-0.297203	0.59	0.603	6.30794e-08	downregulated
INPP5D	4.69476e-12	-0.261612	0.536	0.573	8.95619e-08	downregulated
ING3	7.11838e-12	-0.26796	0.421	0.478	1.35797e-07	downregulated
RBM5	1.1119e-11	-0.273912	0.501	0.534	2.12118e-07	downregulated
MECP2	2.29343e-11	-0.253624	0.54	0.567	4.37517e-07	downregulated
NELFCD	2.34656e-11	-0.287076	0.54	0.543	4.47654e-07	downregulated
MAPKAPK5-AS1	2.5803e-11	-0.250012	0.462	0.522	4.92244e-07	downregulated
CDKN1B	3.02722e-11	-0.302672	0.51	0.549	5.77503e-07	downregulated
CCDC59	3.8293e-11	-0.253082	0.71	0.685	7.30515e-07	downregulated
C1orf21	3.85052e-11	-0.25169	0.135	0.25	7.34564e-07	downregulated
MAN2A1	3.95594e-11	-0.26484	0.307	0.391	7.54674e-07	downregulated
P2RY8	4.66642e-11	-0.274834	0.503	0.539	8.90213e-07	downregulated
PDCD4	4.70121e-11	-0.264445	0.495	0.554	8.96849e-07	downregulated
GLIPR1	6.23813e-11	-0.292652	0.604	0.606	1.19005e-06	downregulated
MAP3K8	1.15717e-10	-0.324162	0.381	0.446	2.20754e-06	downregulated
IGF2R	1.23687e-10	-0.288119	0.407	0.469	2.35958e-06	downregulated
CD6	1.25204e-10	-0.312861	0.516	0.535	2.38852e-06	downregulated
GTF3C1	2.14634e-10	-0.265816	0.346	0.418	4.09456e-06	downregulated
NUB1	2.62835e-10	-0.25659	0.558	0.566	5.01409e-06	downregulated
IRF9	2.69775e-10	-0.296865	0.438	0.489	5.14649e-06	downregulated
SBDS	6.48911e-10	-0.27388	0.579	0.568	1.23793e-05	downregulated
MT1F	1.17378e-09	-0.284635	0.394	0.449	2.23922e-05	downregulated
C5orf24	1.21134e-09	-0.256977	0.41	0.456	2.31087e-05	downregulated
CENPC	3.99842e-09	-0.250938	0.486	0.505	7.62779e-05	downregulated
ARL6IP1	4.76852e-09	0.304034	0.878	0.756	9.0969e-05	upregulated
NFAT5	4.84825e-09	-0.265455	0.292	0.367	9.24901e-05	downregulated
RB1CC1	6.15982e-09	-0.296581	0.51	0.512	0.000117511	downregulated
SIRPG	6.44247e-09	-0.258867	0.514	0.533	0.000122903	downregulated
GPR65	1.91089e-08	-0.265548	0.479	0.498	0.000364541	downregulated
CCDC186	7.04466e-08	-0.256805	0.399	0.446	0.00134391	downregulated
ATRX	1.18894e-07	-0.257034	0.774	0.728	0.00226814	downregulated
RNF125	1.33806e-07	-0.260391	0.51	0.509	0.00255261	downregulated
TRBC1	8.77948e-07	-0.549518	0.575	0.6	0.0167486	downregulated
H1FX	0.000196717	-0.262014	0.941	0.825	1	downregulated
HLA-DQA1	0.0022221	0.39833	0.227	0.177	1	upregulated
FOS	0.00499779	-0.587445	0.316	0.329	1	downregulated
